# Supplementary material for: Phylogeny and a structural model of plant MHX transporters
Source: PubMed Central journal article supplement (PMC3679957; doi:10.1186/1471-2229-13-75), 2013-05-02
Supplement: 1471-2229-13-75-S5.pdf [file 1471-2229-13-75-S5.pdf]

**Additional file 5. Alignment of MHX proteins**

The file presents the alignment of all currently identified MHX proteins. The sequences were aligned by Multalin using the identity-1-0 method. Identical residues were indicated by white letters on a red background and by uppercase letters in the consensus sequence. Similar residues, or the most conserved residues in each position, were indicated by red letters in the protein sequences and a lowercase letter in the consensus sequence. The similarity codes are ! - I or V, \$ - L or M, % - F or Y, and # - D, E, N, or Q. Dots indicate gaps.

|                  | 1                              | 10                    | 20                          | 30       | 40          |          |           |
|------------------|--------------------------------|-----------------------|-----------------------------|----------|-------------|----------|-----------|
| A.thaliana       | .....MASILNQTQELQESSKVLGH      | LR                    | CENFFLFP                    | GGENTLS  | DGLRGVLYFLG |          |           |
| A.halleri        | .....MASILNQTQELQEASKVLGH      | HVR                   | CENFFLFP                    | GGENTLS  | DGLRGVLYFLG |          |           |
| A.lyrata         | .....MASILNQTQELQEASKVLGH      | HVR                   | CENFFLFP                    | GGENTLS  | DGLRGVLYFLG |          |           |
| E.grandis        | MQACFASVRLSLSSSLDLSLPI         | FVSFRRAGTPGDISRSHMMGH | GV                          | CESYLLFP | GGETALGD    | DAFR     | RTFLYFLG  |
| C.clementina     | .....MASIHQAIESISRAFNLHY       | EK                    | CESYLLFR                    | GGETS    | LDG         | FR       | RAFLYFLG  |
| R.communis       | .....MALETNQSGWSRFGLLNILAS     | EK                    | CESYLVFR                    | GGETALS  | VG          | FR       | RTFLYFLG  |
| M.esculenta      | .....MALETNQSGWSRFGLLNILGR     | ER                    | CESYLLFH                    | GGETAL   | LDNG        | FR       | RTFLYFLA  |
| P.trichocarpa    | .....MASAYNQSDGGRFGDTNIVGH     | EK                    | CESYFLFR                    | GGETTLD  | EG          | FR       | RTFLYFLG  |
| P.persica        | .....MPGNSSTMGQ                | EN                    | CESYFLFR                    | GGETTLD  | EG          | FR       | RTFLYFLG  |
| C.papaya         | .....MTWAHWRNAESIQNFNVLQ       | EK                    | CESYLLFR                    | GGETS    | LDG         | FR       | RAFLYFLG  |
| A.coerulea       | .....                          |                       | KCESYFLFR                   | GGEMAL   | GNGL        | FR       | RAFLYLLG  |
| V.vinifera       | .....MAWVHEQLPGNILEAYNISVRE    | EK                    | CESYLLFR                    | GGETS    | LDG         | FR       | RTFLYFLG  |
| G.max            | .....MVPFNSNIGLH               | EK                    | CESYLLFR                    | GGETTLD  | GN          | FR       | RAFIFYFLC |
| M.truncatula     | .....MYKMIGYLSFLAHD            | EK                    | CESYLLFR                    | GGETTLD  | GN          | FR       | RILLYFLG  |
| S.tuberosum      | .....MTSLGNYTTDSTNGHNSNLRH     | EK                    | CDAYLLIH                    | HELETAL  | GG          | FR       | RTFLYFLG  |
| S.lycopersicum   | .....MTSLGNYTTDSTNGHNSNLRH     | EK                    | CDAYLLIH                    | HELETAL  | GG          | FR       | RTFLYFLG  |
| M.guttatus_1     | .....MDPLNNSTAEIIDGGSNIGLV     | EK                    | COLYLLFH                    | DETVLSD  | FR          | RAFLYFLA |           |
| M.guttatus_2     | .....MASLNSSSTWDSNGLH          | ER                    | CLFYFIF                     | HFETKLS  | HGL         | FR       | RGFLYFLA  |
| C.sativus        | .....MASFAIENVESGQAISSISGTG    | K                     | CESYFIF                     | SIETS    | LDAL        | FR       | ILYFLFMG  |
| O.sativa_J1      | .....MANINMADTVPS              |                       | CDTYLLFN                    | GGETLLP  | IG          | FR       | RAFITYTAV |
| O.sativa_I1      | .....MANINMADTVPS              |                       | CDTYLLFN                    | GGETLLP  | IG          | FR       | RAFITYTAV |
| O.sativa_J2      | .....MANINMADTVPS              |                       | CDTYLLFN                    | GGETLLP  | IG          | FR       | RAFITYTAV |
| T.aestivum       | .....MGSTTR                    |                       | CDAYLLFN                    | GGETLLP  | NG          | FR       | RAFICTVA  |
| B.distachyon     | .....MANISMGSNAPS              |                       | CNAYLLFY                    | AEKMLP   | NG          | FR       | RAFAYTVA  |
| Z.mays           | .....MAGAATPPSSSSSSASCT        |                       | DAAYLLFR                    | GGETLLP  | DG          | FR       | VHASLYAVA |
| S.bicolor        | .....MSNIAMVAAPSSSDSDT         |                       | .....YLLFH                  | GGETLLST | GA          | FR       | RASLYTVA  |
| S.italica        | .....MSGPSSAC                  |                       | EGTYLLFH                    | GGETLLSG | GV          | FR       | RAFLYTVA  |
| S.moellendorffii | .....                          |                       | .....CPSLLT                 | QEEQR    | WR          | FR       | RAFAYCLG  |
| P.patens_1       | .....MAGFTNASISAHPSGVWTHNFANA  | AVNATA                | ELCSNHI                     | IFKAEPS  | WVLS        | FR       | RAILYGLC  |
| P.patens_2       | .....AGLSSALVSAFSSPEKNTIHVVHAS | ATSTA                 | ELCPNH                      | IMEAE    | ETWLS       | FR       | RAVLYAFC  |
| consensus>50     | .....                          |                       | e.ce.yllf.gEt.l.dg.raflyflg |          |             |          |           |

|                  | 50                  | 60               | 70                                 | 80    | 90     | 100      | 110              |               |               |
|------------------|---------------------|------------------|------------------------------------|-------|--------|----------|------------------|---------------|---------------|
| A.thaliana       | LAYCFHGLSAITARFFK   | ..               | SMENVVKHSR                         | KVV   | T      | IDPITKA  | EVITYKVVWNTIAD   | ISLLAFGTSFPQI |               |
| A.halleri        | LAYCFHGLSAITARFFK   | ..               | SMENVVKHSR                         | KVVA  |        | IDPITKA  | EITIKYKVVWNTIAD  | ISLLAFGTSFPQI |               |
| A.lyrata         | LAYCFHGLSAITARFFK   | ..               | SMENVVKHSR                         | KVVA  |        | VDPITKA  | EVITYKVVWNTIAD   | ISLLAFGTSFPQI |               |
| E.grandis        | LAYCFHGLSAITARFFS   | ..               | SMENVVKH                           | TR    | EVVE   | IDPQTN   | SKVVRQEKVWNTIAD  | ISLLAFGTSFPQI |               |
| C.clementina     | LAYCFHGLSAITARFFR   | ..               | SMENVVKHSR                         | KVVE  |        | IDPVTKA  | EVVRYEKVWNTIAD   | ISLLAFGTSFPQI |               |
| R.communis       | LAYCFHGLSAITGRFFR   | ..               | SMENVVKHSR                         | KVVE  |        | IDPYSNT  | EVIRYKVVWNTIAD   | ISLLAFGTSFPQI |               |
| M.esculenta      | LAYCFHGLSAITARFFR   | ..               | SMENVVKHSR                         | KVVE  |        | IDPDTNT  | EVIRYKVVWNTIAD   | ISLLAFGTSFPQI |               |
| P.trichocarpa    | LAYCFHGLSAITARFFR   | ..               | SMENVVKHSR                         | KVVE  |        | IDPYTNA  | EVIRYKVVWNTIAD   | ISLLAFGTSFPQI |               |
| P.persica        | LAYCFVGLSAITARFFQ   | ..               | SMESVVS                            | HTR   | KVV    | INPYTGA  | EITIRYKVVWNTIAD  | ISLLAFGTSFPQI |               |
| C.papaya         | IAYCFHGLSAITGRFFR   | ..               | SMENVVKH                           | TR    | EVVE   | IDPITNQ  | EITRHEKVVWNTIAD  | ISLLAFGTSFPQI |               |
| A.coerulea       | LAYCFHGLSAITARFFR   | ..               | SMENVVKH                           | TR    | KVVE   | IDHNTNT  | EVIRHEKVVWNTIAD  | ISLLAFGTSFPQI |               |
| V.vinifera       | LAYCFHGLSAITARFFQ   | ..               | SMENVVKH                           | TR    | KVVE   | IDPDRSNT | EVIRHEKVVWNTIAD  | ISLLAFGTSFPQI |               |
| G.max            | LAYCFHGLSAITARFFQ   | ..               | SMENVVKH                           | TR    | KVVE   | VDPVTK   | ETIRHEKVVWNTIAD  | ISLLAFGTSFPQI |               |
| M.truncatula     | LAYCFHGLSAITSRFFQ   | ..               | SMENVVKHSR                         | KVVE  |        | IDPVTKA  | ETIRHEKVVWNTIAD  | ISLLAFGTSFPQI |               |
| S.tuberosum      | LAYCFHGLSAITGRFFR   | ..               | SMENVVKHSR                         | KVVE  |        | IDPLTNT  | KIVKHEKVVWNTIAD  | ISLLAFGTSFPQI |               |
| S.lycopersicum   | LAYCFHGLSAITGRFFR   | ..               | SMENVVKHSR                         | KVVE  |        | IDPLTNT  | KAVKHEKVVWNTIAD  | ISLLAFGTSFPQI |               |
| M.guttatus_1     | LAYCFHGLSAITSRFFQ   | ..               | SMENVVKH                           | TR    | EVVE   | IDPCTNT  | KTVRHEKVVWNTIAD  | ISLLAFGTSFPQI |               |
| M.guttatus_2     | LAYCFVGLSAITDRFFR   | ..               | SMENVVKHSR                         | KVVE  |        | IDPLTNT  | KVIKHEKVVWNTIAD  | ISLLAFGTSFPQI |               |
| C.sativus        | LAYCFHGLSAITGRFFR   | ..               | SMENVVKHSR                         | KVVE  |        | IDPHTNT  | EIRYKVVWNTIAD    | ISLLAFGTSFPQI |               |
| O.sativa_J1      | LAYCFHGLSAITGRFFK   | ..               | SMESIMR                            | HSR   | EVV    | VDPHTNA  | TIVKHEKVVWNTIAD  | ISLLAFGTSFPQI |               |
| O.sativa_I1      | LAYCFHGLSAITGRFFK   | ..               | SMESIMR                            | HSR   | EVV    | VDPHTNA  | TIVKHEKVVWNTIAD  | ISLLAFGTSFPQI |               |
| O.sativa_J2      | LAYCFHGLSAITGRFFK   | ..               | SMESIMR                            | HSR   | EVV    | VDPHTNA  | TIVKHEKVVWNTIAD  | ISLLAFGTSFPQI |               |
| T.aestivum       | LAYCFHGLSAITGRFFK   | ..               | SMESITN                            | HSR   | EVV    | VDEHTNT  | PVIVKHEKVVWNTIAD | ISLLAFGTSFPQI |               |
| B.distachyon     | LGYCFHGLSAITGRFFK   | ..               | SMESITN                            | HSR   | EVV    | IDPHTNT  | PVIVKHEKVVWNTIAD | ISLLAFGTSFPQI |               |
| Z.mays           | LAYCFVGLSAVTRFFK    | ..               | SMEQIMR                            | HSR   | EVV    | VDPRTCA  | PVVRDKVWNTIAD    | ISLLAFGTSFPQI |               |
| S.bicolor        | LAYCFHGLSAITGRFFK   | ..               | SMEQIMR                            | HSR   | EVV    | IDPHTKE  | PVIVKHEKVVWNTIAD | ISLLAFGTSFPQI |               |
| S.italica        | LAYCFHGLSAITGRFFK   | ..               | SMEQIMR                            | HSR   | EVV    | VDPHTNA  | PVIVKHEKVVWNTIAD | ISLLAFGTSFPQI |               |
| S.moellendorffii | LAYCFHGLAVITRVYMR   | ALDS             | ..                                 | IVRHS | RKSVHR | DPITGLR  | IFSERIRWNTIAD    | ISLLAFGTSFPQI |               |
| P.patens_1       | LLYCFVGLATITNLFM    | QAGGS            | SAMGTIAN                           | TRKIV | RHNDE  | SGS      | EVVHVRWNTIAD     | ISLLAFGTSFPQI |               |
| P.patens_2       | IIVCFVGLATITNLFM    | QAGGS            | SAMEKIV                            | HTR   | KVVR   | HNYE     | IGSDIIVHER       | WNLVIAD       | ISLLAFGTSFPQI |
| consensus>50     | laYCFiGLsa!tar%f... | SmenvvkhSr.vv..i | #p.tn.evi..ek!WNYt!ADi.LLafGTSfPQ! |       |        |          |                  |               |               |

|                  | 120                                                                      | 130               | 140       | 150    | 160      | 170      | 180       |             |             |
|------------------|--------------------------------------------------------------------------|-------------------|-----------|--------|----------|----------|-----------|-------------|-------------|
| A.thaliana       | SLATIDAIRNMG                                                             | ERYAGGLPGPTLVGSA  | AADF      | DLFP   | IHAVCVVV | PKAGELKK | ISDLGVWLV | ELVWSFWAYIW |             |
| A.halleri        | SLATIDAIRNIG                                                             | ERYAGGLPGPTLVGSA  | AADF      | DLFP   | IHAVCVVV | PKAGELKK | ISDLGVWLV | ELVWSFWAYIW |             |
| A.lyrata         | SLATIDAIRNIG                                                             | ERYAGGLPGPTLVGSA  | AADF      | DLFP   | IHAVCVVV | PKAGELKK | ISDLGVWLV | ELVWSFWAYIW |             |
| E.grandis        | SLATIDAIRNLG                                                             | ELYAGGLPGPTLVGSA  | AADF      | DLFP   | IHAVCVVV | PKAGELKK | ISDLGVWLV | ELVWSFWAYIW |             |
| C.clementina     | SLATIDAIRSIG                                                             | NLYAGGLPGPTLVGSA  | AADF      | DLFP   | IHAVCVVV | PKAGELKK | ISDLGVWLV | ELVWSFWAYIW |             |
| R.communis       | SLATIDAIRNIG                                                             | NLYAGGLPGPTLVGSA  | AADF      | DLFP   | IHAVCVVV | PKAGELKK | ISDLGVWLV | ELVWSFWAYIW |             |
| M.esculenta      | SLATIDAIRNIG                                                             | NLYAGGLPGPTLVGSA  | AADF      | DLFP   | IHAVCVVV | PKAGELKK | ISDLGVWLV | ELVWSFWAYIW |             |
| P.trichocarpa    | SLATIDAIQNI                                                              | GNLYAGGM          | PGPTLVGSA | AADF   | DLFP     | IHAVCVVV | PKAGELKK  | ISDLGVWLV   | ELVWSFWAYIW |
| P.persica        | SLATIDAIRNLG                                                             | NLYAGGLPGPTLVGSA  | AADF      | DLFP   | IHAVCVVV | PRAGELKK | ISDLGVWLV | ELVWSFWAYIW |             |
| C.papaya         | SLATIDAIRNLG                                                             | NLYAGGLPGPTLVGSA  | AADF      | DLFP   | IHAVCVVV | PKAGELKK | ISDLGVWLV | ELVWSFWAYIW |             |
| A.coerulea       | SLATIDAIRNLG                                                             | QIYAGGLPGPTLVGSA  | AADF      | DLFP   | IHAVCVVV | PKAGELKK | ISDLGVWLV | ELVWSFWAYIW |             |
| V.vinifera       | SLAIDPSIQNLG                                                             | SRYAGGLPGPTLVGSA  | AADF      | DLFP   | IHAVCVVV | PKAGELKK | ISDLGVWLV | ELVWSFWAYIW |             |
| G.max            | SLATIDAIQNI                                                              | GKLYAGGLPGPTLVGSA | AADF      | DLFP   | IHAVCVVV | PKAGELKK | ISDLGVWLV | ELVWSFWAYIW |             |
| M.truncatula     | SLATIDAIRNLG                                                             | DLYAGGLPGPTLVGSA  | AADF      | DLFP   | IHAVCVVV | PKAGELKK | ISDLGVWLV | ELVWSFWAYIW |             |
| S.tuberosum      | SLATIDAIRNIG                                                             | KLYAGGLPGPTLVGSA  | AADF      | DLFP   | IHAVCVVV | PKAGELKK | ISDLGVWLV | ELVWSFWAYIW |             |
| S.lycopersicum   | SLATIDAIRNIG                                                             | KLYAGGLPGPTLVGSA  | AADF      | DLFP   | IHAVCVVV | PKAGELKK | ISDLGVWLV | ELVWSFWAYIW |             |
| M.guttatus_1     | SLATIDAIRNLG                                                             | SLYAGGLPGPTLVGSA  | AADF      | DLFP   | IHAVCVVV | PKAGELKK | ISDLGVWLV | ELVWSFWAYIW |             |
| M.guttatus_2     | SLATIDAIRNIG                                                             | SLTAGGLPGPTLVGSA  | AADF      | DLFP   | IHAVCVVV | PKAGELKK | ISDLGVWLV | ELVWSFWAYIW |             |
| C.sativus        | SLATIDAIRNIG                                                             | NLYAGGLPGPTLVGSA  | AADF      | DLFP   | IHAVCVVV | PKAGELKK | ISDLGVWLV | ELVWSFWAYIW |             |
| O.sativa_J1      | SLATIDAIRNLG                                                             | QLTAGGLPGPTLVGSA  | AADF      | DLFP   | IHAVCVVV | PRAGSKKK | ISDLGVWLV | ELVWSFWAYIW |             |
| O.sativa_I1      | SLATIDAIRNLG                                                             | QLTAGGLPGPTLVGSA  | AADF      | DLFP   | IHAVCVVV | PRAGSKKK | ISDLGVWLV | ELVWSFWAYIW |             |
| O.sativa_J2      | SLATIDAIRNLG                                                             | QLTAGGLPGPTLVGSA  | AADF      | DLFP   | IHAVCVVV | PRAGSKKK | ISDLGVWLV | ELVWSFWAYIW |             |
| T.aestivum       | SLATIDAIRNLG                                                             | QLTAGGLPGPTLVGSA  | AADF      | DLFP   | IHAVCVVV | PRAGSMKK | ISDLGVWLV | ELVWSFWAYIW |             |
| B.distachyon     | SLATIDAIRNLG                                                             | QLTAGGLPGPTLVGSA  | AADF      | DLFP   | IHAVCVVV | PRAGSMKK | ISDLGVWLV | ELVWSFWAYIW |             |
| Z.mays           | SLATIDAIRNLG                                                             | QLTAGGLPGPTLVGSA  | AADF      | DLFP   | IHAVCVVV | PRAGSKKK | ISDLGVWLV | ELVWSFWAYIW |             |
| S.bicolor        | SLAIDIDAIRNLG                                                            | QLTAGGLPGPTLVGSA  | AADF      | DLFP   | IHAVCVVV | PRAGSKKK | ISDLGVWLV | ELVWSFWAYIW |             |
| S.italica        | SLATIDAIRNLG                                                             | QLTAGGLPGPTLVGSA  | AADF      | DLFP   | IHAVCVVV | PRAGSKKK | ISDLGVWLV | ELVWSFWAYIW |             |
| S.moellendorffii | SLAVIDAIFQHI                                                             | GQ.TSGKLG         | AGTLLGS   | AFNLF  | LAVCVVAP | KRFQTK   | SRNVGVY   | IEVWSFWAYIW |             |
| P.patens_1       | SLSIDAIFQIQI                                                             | GKTNAGL           | GP        | TIVGSA | AFNLYP   | LAVCVVAP | KAGSVK    | RQNVGVWLV   | ELVWSFWAYIW |
| P.patens_2       | SLAIDDAFQQLG                                                             | QKTEAGL           | GP        | TIVGSA | AFNLYI   | LAVCVVAP | KAGSTKH   | RSIGVWLV    | ELVWSFWAYIW |
| consensus>50     | SLatIDairnlGqlYagg\$GpTlvGSAAF#\$\$pIhAVCVvvPkaGelKkIsdlGvWl!ElfwsfWAYIW |                   |           |        |          |          |           |             |             |

190 200 210 220 230 240 250  
A.thaliana LYIILEVWSPNVITLV EALLTVLQYGLLLVHAYAQDKRWPYLSIFMSRGRDRPEEWVPEIDTTSKDDNDND  
A.halleri LYIILEVWSPNVITLV EALLTVLQYGLLLVHAYAQDKRWPYLSIFMSRGRDRPEEWVPEIDTTSKDDNDND  
A.lyrata LYIILEVWSPNVITLV EALLTVLQYGLLLVHAYAQDKRWPYLSIFMSRGRDRPEEWVPEIDTTSKDDNDND  
E.grandis LYIILEVWTPDIVITLV EALLTVLQYGLLLVHAYAQDKRWPYLSIFLARGERPEEWVPEAASYSKHVNDVD  
C.clementina LYIILEVWTPNVITLW EALLTVLQYGLLLVHAYAQDKRWPYLSIFIARTERP EDWVPEITTSKDDNDND  
R.communis LYIILEVWTPNVITLW EALLTVLQYGLLLVHAYAQDKRWPYLSIFIERTERP EDWVPEITTSKDDNDND  
M.esculenta LYIILEVWTPNVITLW EALLTVLQYGLLLVHAYAQDKRWSYLSIFLGRTERPKEWVPEITTSKHQPIDY  
P.trichocarpa LYIILEVWTPNVITLW EALLTVLQYGLLLM HAYAQDKRWPYLSIFIPRTERPEEWVPEITTSKHQPIDY  
P.persica LYIILEVWTPNVITLW EALLTVLQYGLLLM HAYAQDKRWPYLSIFIPRTERPEEWVPEITTSKHQPIDY  
C.papaya LYIILEVWTPNVITLW EALLTVLQYGLLLM HAYAQDKRWPYLSIFIPRTERPEEWVPEITTSKHQPIDY  
A.coerulea LYIILEVWTPNVITLW EALLTVLQYGLLLM HAYAQDKRWPYLSIFIPRTERPEEWVPEITTSKHQPIDY  
V.vinifera LYIILEVWTPNVITLW EALLTVLQYGLLLM HAYAQDKRWPYLSIFIPRTERPEEWVPEITTSKHQPIDY  
G.max LYIILEVWTPNVITLW EALLTVLQYGLLLM HAYAQDKRWPYLSIFIPRTERPEEWVPEITTSKHQPIDY  
M.truncatula LYIILEVWTPNVITLW EALLTVLQYGLLLM HAYAQDKRWPYLSIFIPRTERPEEWVPEITTSKHQPIDY  
S.tuberosum LYIILEVWTPNVITLW EALLTVLQYGLLLM HAYAQDKRWPYLSIFIPRTERPEEWVPEITTSKHQPIDY  
S.lycopersicum LYIILEVWTPNVITLW EALLTVLQYGLLLM HAYAQDKRWPYLSIFIPRTERPEEWVPEITTSKHQPIDY  
M.guttatus\_1 LYIILEVWTPNVITLW EALLTVLQYGLLLM HAYAQDKRWPYLSIFIPRTERPEEWVPEITTSKHQPIDY  
M.guttatus\_2 LYIILEVWTPNVITLW EALLTVLQYGLLLM HAYAQDKRWPYLSIFIPRTERPEEWVPEITTSKHQPIDY  
C.sativus LYIILEVWTPNVITLW EALLTVLQYGLLLM HAYAQDKRWPYLSIFIPRTERPEEWVPEITTSKHQPIDY  
O.sativa\_J1 LYIILEVWTPNVITLW EALLTVLQYGLLLM HAYAQDKRWPYLSIFIPRTERPEEWVPEITTSKHQPIDY  
O.sativa\_I1 LYIILEVWTPNVITLW EALLTVLQYGLLLM HAYAQDKRWPYLSIFIPRTERPEEWVPEITTSKHQPIDY  
O.sativa\_J2 LYIILEVWTPNVITLW EALLTVLQYGLLLM HAYAQDKRWPYLSIFIPRTERPEEWVPEITTSKHQPIDY  
T.aestivum LYIILEVWTPNVITLW EALLTVLQYGLLLM HAYAQDKRWPYLSIFIPRTERPEEWVPEITTSKHQPIDY  
B.distachyon LYIILEVWTPNVITLW EALLTVLQYGLLLM HAYAQDKRWPYLSIFIPRTERPEEWVPEITTSKHQPIDY  
Z.mays LYVILEVWTPRVITLW EALLTVLQYGLLLM HAYAQDKRCPVSIFFARGERP EDWVPEITTSKHQPIDY  
S.bicolor LYVILEVWTPRVITLW EALLTVLQYGLLLM HAYAQDKRCPVSIFFARGERP EDWVPEITTSKHQPIDY  
S.italica LYVILEVWTPRVITLW EALLTVLQYGLLLM HAYAQDKRCPVSIFFARGERP EDWVPEITTSKHQPIDY  
S.moellendorffii LFLILKIEWTPNEITLW EAVTVAQFPFLVHAYIQDRNKWYLSIFLRSDAIESSDMMNHLHLAN...  
P.patens\_1 LAIILQVSSPNVVEPWEAMCTVQFPFLVHAYIQDRNKWYLSIFLRSDAIESSDMMNHLHLAN...  
P.patens\_2 LAIILQVSSPNVVEPWEAMCTVQFPFLVHAYIQDRNKWYLSIFLRSDAIESSDMMNHLHLAN...  
consensus>50 LyIiLe!wtPnvItlwEallTVlQ%glllHAYAQDKRWPYLSIFIP.r.ERP EDWVPEITTSKHQPIDY

260 270 280 290 300  
A.thaliana VHDVYSDAAQDAVESGSRNIVDIFSISHSANN DTGITYHTVADTPPDSATKKGKAKN...  
A.halleri VHDVYSDAAQDAVESGSRNIVDIFSISHSANN DTGITYHTVADTPPDSATKKGKAKN...  
A.lyrata VHDVYSDAAQDAVESGSRNIVDIFSISHSANN DTGITYHTVADTPPDSATKKGKAKN...  
E.grandis GPMYHNVPASDLAESSNELHVLAL...  
C.clementina DEC...SEILQLGEDENRNGVVDIFSISHPNGAVTSPLYQKVPGESEDAVEISKESFRE...  
R.communis EEY...SEIVQVSEEDSRNIVDIFSISHPVGT...TDVYQKVPETDAAVESNNYSLS...  
M.esculenta EEY...SEILQVDKDESRRNVVDIFSISHSNVE...TDQVYHKVPETDDAVEFSDKNFHS...  
P.trichocarpa GE...ENRNVVDIFSISHSNVE...T.VYQKVPETDDAAVESNNKHFHQ...  
P.persica NNY...SEILQVGEDENRNGVVDIFSISHSGLG...PVYQNVPTDTPPEYNNKDSPE...  
C.papaya F...VVDIFSISHSAP...STEYQKVPADENIPPEYSGKSSRK...  
A.coerulea SEI...LQLE...ED.NIVDIFSISHSKETGPLYQPVSN...DAVESSNMNFHN...  
V.vinifera DEC...SEILQ...ENRNVVDIFSISHSND...GSVYHRISGS...EVAEPSSNEHFQK...  
G.max VDF...SDIKHVNE.ENGDTVDIFSISHSNPTDPLYARVPSIND...EAEILDKAK...  
M.truncatula VEC...SEINHFNENRNGVVDIFSISHSNPTDMSYVRVPQIDD...AENSNDKVI...  
S.tuberosum EPH...SEVSVQVEEENRNGVVDIFSISHSNPTDMSYVRVPQIDD...LAGEDVTESTPNNG...  
S.lycopersicum EPH...SEVSVQVEEENRNGVVDIFSISHSNPTDMSYVRVPQIDD...LAGEDVTESTPNNG...  
M.guttatus\_1 EIP...EDHESGR...IVDIFSISHSNPTDMSYVRVPQIDD...HUYQN...LSGSDSGEPSSGSH...  
M.guttatus\_2 KTR...DNYPQAHENRNSIIVDIFSISHSNPTDMSYVRVPQIDD...ADTDIHESSSEQCRV...  
C.sativus NPC...REFQAHENRNSIIVDIFSISHSNPTDMSYVRVPQIDD...HDIAESSSNPIPEEM...  
O.sativa\_J1 GI...GDILPGQ...NEIDVDFSAHSYSNEG.YHHV...SEEDVEESS.TGLTL...  
O.sativa\_I1 GI...GDILPGQ...NEIDVDFSAHSYSNEG.YHHV...SEEDVEESS.TGLTL...  
O.sativa\_J2 GI...GDILPGQ...NEIDVDFSAHSYSNEG.YHHV...SEEDVEESS.TGLTL...  
T.aestivum EN...SDILPSE...NDVVDIFSISHSYNNAG.YHHV...PEKDIEESSKTTLVV...  
B.distachyon ES...SEILPRE...NEIDVDFSMHSYNNAG.YHHV...PEKDIEESSKTTLVV...  
Z.mays GI...DETLMGADGNDGIVDIFSISHSYNDAAEYSQL...AEEDMEGSSSTMDDQVV...  
S.bicolor DT...NETLPIANRNDGIVDIFSISHSYNNAG.YHHV...PEKDMEGSSSTMDDQVV...  
S.italica ET...SEILPGSSDKD...IADVFSHSYNNAG.YHHV...PENDEMEGSSSTMDDQVV...  
S.moellendorffii ...VSRSSKFAAMRELVATRPHNFRLLFFSSRAEDV...  
P.patens\_1 DQSTAYSSSPRVLDLQHRSEWELVDLQHPKQEIIRNRVTCDHHPKPIEIQVAVAVDKNEEDSDPG...  
P.patens\_2 HDQSASFSLNLEVFSEQSTSDLERVDLQYLFMKEIRNGVTFDDHRISPFERQVIGANDISEQLTCGSKNS...  
consensus>50 e.e.e.n.nivdifsish.n.d.e.s

310 320 330 340 350  
A.thaliana ...STVFDIWKHFQVDAITLETS ESKKVDSIYLRIAKSFWHLLLPWKLLF...  
A.halleri ...SSVFDIWKHFQVDAITLETS ESKKVDSIYLRIANSFWQLLLAPWKLLF...  
A.lyrata ...STVFGIWKHFQVDAITLETS ESKKVDSIYLRIAKSFWQLLLAPWKLLF...  
E.grandis ...WKEQFVDAALMLESATKKLYSIYVRLARMLWQSLLPWRLLF...  
C.clementina ...EINSELPVHALWQKQFVDALESPEERKMNXYLRLARIYVQSLLPWRLLF...  
R.communis ...EKDL...DVAALWQKQFVDAITLESLESRNMFSIHRLARTFWEILLAPWRLLF...  
M.esculenta ...EQDF...NVAALWQKQFVDAITLESLESRNMFSIHRLARTFWEILLAPWRLLF...  
P.trichocarpa ...EKDL...HVLSLWKEQFVDALTLLESLETRKLNXYLRLARIYVQSLLPWRLLF...  
P.persica ...KMSLEDYVFAIWKQFVDAVVKLSESRQLNXYLRLARIYVQSLLPWRLLF...  
C.papaya ...EILLEDPNVITLWQKQFVDAITLESLESRKLNXYLRLARIYVQSLLPWRLLF...  
A.coerulea ...KSVLQDFNVFTVWKHFQVDAVMLENPEESRKLNDXYLRLARIFWQVILAPWRLLF...  
V.vinifera ...NILEDSHLLSLWQKQFVDAITLESLESRKLNXYLRLARIFWQVILAPWRLLF...  
G.max ...ETTLVDTHLLTIWRQOFVDAITLESLESRKLNXYLRLARIFWQVILAPWRLLF...  
M.truncatula ...ETRLDTCLLTIWKQFVDAITLESLESRKLNXYLRLARIFWQVILAPWRLLF...  
S.tuberosum ...NIIEESDILSLWKHFQVDAITLESLESRKLNXYLRLARIFWQVILAPWRLLF...  
S.lycopersicum ...YIIEESDILSLWKHFQVDAITLESLESRKLNXYLRLARIFWQVILAPWRLLF...  
M.guttatus\_1 ...DIHVKNLISLWKHFQVDAITLESLESRKLNXYLRAKVIYVQSLLPWRLLF...  
M.guttatus\_2 ...DTIPHKDDLVLKWKHFQVDAITLESLESRKLNXYLRAKVIYVQSLLPWRLLF...  
C.sativus ...DGKADHPVLKWKHFQVDAITLESLESRKLNXYLRAKVIYVQSLLPWRLLF...  
O.sativa\_J1 ...KNKWEDTHWFSIWKHFQVDAITLESLESRKLNXYLRAKVIYVQSLLPWRLLF...  
O.sativa\_I1 ...KNKWEDTHWFSIWKHFQVDAITLESLESRKLNXYLRAKVIYVQSLLPWRLLF...  
O.sativa\_J2 ...KNKWEDTHWFSIWKHFQVDAITLESLESRKLNXYLRAKVIYVQSLLPWRLLF...  
T.aestivum ...KNTQEDYIWLSSVWRQOFVDAITLESLESRKLNXYLRAKVIYVQSLLPWRLLF...  
B.distachyon ...KNTQEDYIWLSSVWRQOFVDAITLESLESRKLNXYLRAKVIYVQSLLPWRLLF...  
Z.mays ...KNTQEDYIWLSSVWRQOFVDAITLESLESRKLNXYLRAKVIYVQSLLPWRLLF...  
S.bicolor ...KNTQEDYIWLSSVWRQOFVDAITLESLESRKLNXYLRAKVIYVQSLLPWRLLF...  
S.italica ...KNTREDTSWRSIWKHFQVDAITLESLESRKLNXYLRAKVIYVQSLLPWRLLF...  
S.moellendorffii DTSSRDNF AFLREGAETHFSWKALGTAWKQFVDAITLESLESRKLNXYLRAKVIYVQSLLPWRLLF...  
P.patens\_1 ...SNQEFKQRLAYDIYEQTSMTWYIYSSWKHFQVDAITLESLESRKLNXYLRAKVIYVQSLLPWRLLF...  
P.patens\_2 ...ESNQELVKLRSTNEIDEHTSGRTNACSLWKHFQVDAITLESLESRKLNXYLRAKVIYVQSLLPWRLLF...  
consensus>50 ed.v.siwkqQFVDA.les.esrklid.i.ir.ari.wqlllapwrllf

360 370 380 390 400 410 420  
A.thaliana AFVPPCNIAHGWI AFICSLLEIFSGVAFVVTRFTDLIS CVTGINPYVIAFTALAS GTSWPDLVASKIAAER  
A.halleri AFVPPCNIAHGWI AFIFSLLEIFSGVAFVVTRFTDLIS CVTGINPYVIAFTALAS GTSWPDLVASKIAAER  
A.lyrata AFVPPCNIAHGWI AFICSLLEIFSGVAFVVTRFTDLIS CVTGINPYVIAFTALAS GTSWPDLVASKIAAER  
E.grandis ALVPPCQIAHGWI AFICSLLEIFSGIAYVVTKLTDLLIS CVTGINAYVIAFTALATGTSWPDLVASKIAAER  
C.clementina AFVPPYHIAHGWI AFICSLLEIFSGIAYVVTKLTDLLIS CVTGINAYVIAFTALAS GTSWPDLVASKIAAER  
R.communis AFVPPYHIAHGWI AFICSLLEIFSGIAYIVTKLTDLLIS CVTGINAYVIAFTALAS GTSWPDLVASKIAAER  
M.esculenta AFVPPYHIAHGWI AFICSLLEIFSGIAYIVTKLTDLLIS CVTGINAYVIAFTALAS GTSWPDLVASKIAAER  
P.trichocarpa AFVPPYHIAHGWI AFIFSLLEIFSGIAYIVTKLTDVLS CVTGINAYVIAFTALAS GTSWPDLVASKIAAER  
P.persica AFVPPYHIAHGWI AFICSLLEIFSAIAYIVTKLTDLLIS CVTGINPYVIAFTALAS GTSWPDLVASKIAAER  
C.papaya AFVPPYHISHGWI AFVCSLLLEIFSGIAYIVTKLTDVLS CVTGINPYVIAFTALACGTSWPDLVASKIAAER  
A.coerulea AFVPPCHIAHGWI AFICSLLEIFSGIAYIVTKLTDMLIS CVTGINPYVIAFTALAS GTSWPDLVASKIAAER  
V.vinifera AFVPPPHIAHGWI AFICSLLEIFSGIAYIVTKLTDLLIS CTSGINSYVIAFTALAS GTSWPDLVASKIAAER  
G.max AFVPPCQIAHGWI SFICSLLEIFSGIAYVVTKITDVIS CVTGINAYVIAFTALAS GTSWPDLVASKIAAER  
M.truncatula AFVPPCHIAHGWI SFICSLLEIFSGIAYVVTKITDVIS CVTGINAYVIAFTALAS GTSWPDLVASKIAAKR  
S.tuberosum AFVPPYQIAHGWI AFICSLLEIFSGIAYVVTKITDLLIS CVTGINPYVIAFTALAS GTSWPDLVASKIAAER  
S.lycopersicum AFVPPYQIAHGWI AFICSLLEIFSGIAYVVTKITDLLIS CVTGINPYVIAFTALAS GTSWPDLVASKIAAER  
M.guttatus\_1 AFVPPYQIAHGWI SFICSLLEIFSGIAYVVTKLTDLLIS CVTGINAYVIAFTALAS GTSWPDLVASKIAAER  
M.guttatus\_2 AFVPPYQIAHGWI AFIFSLLEIFSGIAYIVTKITDLLIS CVTGINAYVIAFTALAS GTSWPDLVASKIAAER  
C.sativus AFVPPYHIAHGWI AFICSLMPEIFSGIAYVTKFTDLLIS CVSGINPYVIAFTALAS GTSWPDLVASKIAAER  
O.sativa\_J1 AFVPPYHIAHGWI AFICSLLEIFSGIAYVTKITDQIS CVTGVSPYVIAFTALAS GTSWPDLVASKIAAER  
O.sativa\_I1 AFVPPYHIAHGWI AFICSLLEIFSGIAYVTKITDQIS CVTGVSPYVIAFTALAS GTSWPDLVASKIAAER  
O.sativa\_J2 AFVPPYHIAHGWI AFICSLLEIFSGIAYVTKITDQIS CVTGVSPYVIAFTALAS GTSWPDLVASKIAAER  
T.aestivum AFVPPYQIAHGWI AFIFSLLEIFSGIAYVTKITDQIS CVTGLNRYVIAFTALAS GTSWPDLVASKIAAER  
B.distachyon AFVPPYQIAHGWI AFICSLLEIFSGIAYVTKITDQIS CVTGVNLYVIAFTALAS GTSWPDLVASKIAAER  
Z.mays AFVPPYHIAHGWI AFICSLLEIFSGIAYVTKLTDQIS CVTGVSPYVIAFTALAS GTSWPDLVASKIAAER  
S.bicolor AFVPPYHIAHGWI AFICSLLEIFSGIAYVTKLTDQIS CVTGVSPYVIAFTALAS GTSWPDLVASKIAAER  
S.italica AFVPPYHIAHGWI AFICSLLEIFSGIAYVTKLTDQIS CVTGVSPYVIAFTALAS GTSWPDLVASKIAAER  
S.moellendorffii AFVPPYHIAHGWI AFICSLLEIFSGIAYVTKLTDQIS CVTGVSPYVIAFTALAS GTSWPDLVASKIAAER  
P.patens\_1 AFLPPSLLHGWAFLCALAHITVIACFLIKLTLNLFQ CVTGISKYLALTYLAAGTSPDLVASKIAAEI  
P.patens\_2 AFLPPMLLNGWAFMCALAHITVVISCFLLKLANSEFC CVTGVSDYVLLALTYLAAGTSPDLVASKIAAKH  
consensus>50 AfvPpyqiahGwiaFicslleifsgIayvvtklt#lisCvtGinpyVIAFTALAS.GTSWPD#LVASKIAAER

430 440 450 460 470 480 490  
A.thaliana QLTADSAIANITCSNSVNIYVGIQVPLINTVYNYFAYREPLYIENAKGLSFSLLIFFATSVGCIIVLVVL  
A.halleri QLTADSAIANITCSNSVNIYVGIQVPLINTVYNYFAYREPLYIENAKGLSFSLLIFFATSVGCIIVLVVL  
A.lyrata QLTADSAIANITCSNSVNIYVGIQVPLINTVYNYFAYREPLYIENAKGLSFSLLIFFATSVGCIIVLVVL  
E.grandis QLTADSAIANITCSNSVNIYVGIQVPLINTVYNYFAYREPLRIQNAAGLSFSLLIVFFATSVGCIIVLVVL  
C.clementina QLTADSAIANITCSNSVNIYVGIQVPLINTVYNYFAYREPLRVQNAAGLSFSLLIVFFATSVGCIIVLVVL  
R.communis QLTADSAIANITCSNSVNIYVGIQVPLINTVYNYFAYREPLRVQNAAGLSFSLLIVFFATSVGCIIVLVVL  
M.esculenta QLTADSAIANITCSNSVNIYVGIQVPLINTVYNYFAYREPLRVQNAAGLSFSLLIVFFATSVGCIIVLVVL  
P.trichocarpa QLTADSAIANITCSNSVNIYVGIQVPLINTVYNYFAYREPLRVQNAAGLSFSLLIVFFATSVGCIIVLVVL  
P.persica QLTADSAIANITCSNSVNIYVGIQVPLINTVYNYFAYREPLRVQNAAGLSFSLLIVFFATSVGCIIVLVVL  
C.papaya QLTADSAIANITCSNSVNIYVGIQVPLINTVYNYFAYREPLRVQNAAGLSFSLLIVFFATSVGCIIVLVVL  
A.coerulea QLTADSAIANITCSNSVNIYVGIQVPLINTVYNYFAYREPLRVQNAAGLSFSLLIVFFATSVGCIIVLVVL  
V.vinifera QLTADSAIANITCSNSVNIYVGIQVPLINTVYNYFAYREPLRVQNAAGLSFSLLIVFFATSVGCIIVLVVL  
G.max QLTADSAIANITCSNSVNIYVGIQVPLINTVYNYFAYREPLRVQNAAGLSFSLLIVFFATSVGCIIVLVVL  
M.truncatula QLTADSAIANITCSNSVNIYVGIQVPLINTVYNYFAYREPLRVQNAAGLSFSLLIVFFATSVGCIIVLVVL  
S.tuberosum QLTADSAIANITCSNSVNIYVGIQVPLINTVYNYFAYREPLRVQNAAGLSFSLLIVFFATSVGCIIVLVVL  
S.lycopersicum QLTADSAIANITCSNSVNIYVGIQVPLINTVYNYFAYREPLRVQNAAGLSFSLLIVFFATSVGCIIVLVVL  
M.guttatus\_1 QLTADSAIANITCSNSVNIYVGIQVPLINTVYNYFAYREPLRVQNAAGLSFSLLIVFFATSVGCIIVLVVL  
M.guttatus\_2 QLTADSAIANITCSNSVNIYVGIQVPLINTVYNYFAYREPLRVQNAAGLSFSLLIVFFATSVGCIIVLVVL  
C.sativus QLTADSAIANITCSNSVNIYVGIQVPLINTVYNYFAYREPLRVQNAAGLSFSLLIVFFATSVGCIIVLVVL  
O.sativa\_J1 QLTADSAIANITCSNSVNIYVGIQVPLINTVYNYFAYREPLRVQNAAGLSFSLLIVFFATSVGCIIVLVVL  
O.sativa\_I1 QLTADSAIANITCSNSVNIYVGIQVPLINTVYNYFAYREPLRVQNAAGLSFSLLIVFFATSVGCIIVLVVL  
O.sativa\_J2 QLTADSAIANITCSNSVNIYVGIQVPLINTVYNYFAYREPLRVQNAAGLSFSLLIVFFATSVGCIIVLVVL  
T.aestivum QLTADSAIANITCSNSVNIYVGIQVPLINTVYNYFAYREPLRVQNAAGLSFSLLIVFFATSVGCIIVLVVL  
B.distachyon QLTADSAIANITCSNSVNIYVGIQVPLINTVYNYFAYREPLRVQNAAGLSFSLLIVFFATSVGCIIVLVVL  
Z.mays QLTADSAIANITCSNSVNIYVGIQVPLINTVYNYFAYREPLRVQNAAGLSFSLLIVFFATSVGCIIVLVVL  
S.bicolor QLTADSAIANITCSNSVNIYVGIQVPLINTVYNYFAYREPLRVQNAAGLSFSLLIVFFATSVGCIIVLVVL  
S.italica QLTADSAIANITCSNSVNIYVGIQVPLINTVYNYFAYREPLRVQNAAGLSFSLLIVFFATSVGCIIVLVVL  
S.moellendorffii YLTADSAIANINASNINIVYVGIQVPLINTVYNYFAYREPLRVQNAAGLSFSLLIVFFATSVGCIIVLVVL  
P.patens\_1 QLTADSAIANINASNINIVYVGIQVPLINTVYNYFAYREPLRVQNAAGLSFSLLIVFFATSVGCIIVLVVL  
P.patens\_2 LPTADSAIANINASNINIVYVGIQVPLINTVYNYFAYREPLRVQNAAGLSFSLLIVFFATSVGCIIVLVVL  
consensus>50 q.TADSAIANITCSNS!N!YvGiG!Pwldt.Ynffay.eplr!ena.GlsFsliv%faTsvGci.vlvl

500 510 520 530  
A.thaliana RRLIIIGAEELGGPRLWAWLTSAYFMMLWVVFVVLSSKRVSGVI  
A.halleri RRLIIIGAEELGGPRLWAWLTSAYFMMLWVVFVVLSSKRVSGVI  
A.lyrata RRLIIIGAEELGGPRLWAWLTSAYFMMLWVVFVVLSSKRVSGVI  
E.grandis RRLTLGAEELGGPRLWAWLTSAYFMMLWVVFVVLSSKRVSGII  
C.clementina RRLTLGAEELGGPRLWAWLTSAYFMMLWVVFVVLSSKRVSGII  
R.communis RRLTLGAEELGGPRLWAWLTSAYFMMLWVVFVVLSSKRVSGII  
M.esculenta RRLTLGAEELGGPRLWAWLTSAYFMMLWVVFVVLSSKRVSGII  
P.trichocarpa RRLTLGAEELGGPRLWAWLTSAYFMMLWVVFVVLSSKRVSGII  
P.persica RRLTLGAEELGGPRLWAWLTSAYFMMLWVVFVVLSSKRVSGII  
C.papaya RRLTLGAEELGGPRLWAWLTSAYFMMLWVVFVVLSSKRVSGII  
A.coerulea RRLTLGAEELGGPRLWAWLTSAYFMMLWVVFVVLSSKRVSDII  
V.vinifera RRLTLGAEELGGPRLWAWLTSAYFMMLWVVFVVLSSKRVSGII  
G.max RRLIIIGAEELGGPRLWAWLTSAYFMMLWVVFVVLSSKRVSGFI  
M.truncatula RRLIIIGAEELGGPRLWAWLTSAYFMMLWVVFVVLSSKRVSGFI  
S.tuberosum RRLTLGAEELGGPRLWAWLTSAYFMMLWVVFVVLSSKRVSGII  
S.lycopersicum RRLTLGAEELGGPRLWAWLTSAYFMMLWVVFVVLSSKRVSGII  
M.guttatus\_1 RRLTLGAEELGGPRLWAWLTSAYFMMLWVVFVVLSSKRVSGII  
M.guttatus\_2 RRLTLGAEELGGPRLWAWLTSAYFMMLWVVFVVLSSKRVSGII  
C.sativus RRVTLGAEELGGPRLWAWLTSAYFMMLWVVFVVLSSKRVSDII  
O.sativa\_J1 RRVTLGAEELGGPRLWAWLTSAYFMMLWVVFVVLSSKRVSGII  
O.sativa\_I1 RRVTLGAEELGGPRLWAWLTSAYFMMLWVVFVVLSSKRVSGII  
O.sativa\_J2 RRVTLGAEELGGPRLWAWLTSAYFMMLWVVFVVLSSKRVSGII  
T.aestivum RRVTLGAEELGGPRLWAWLTSAYFMMLWVVFVVLSSKRVSGII  
B.distachyon RRVTLGAEELGGPRLWAWLTSAYFMMLWVVFVVLSSKRVSGII  
Z.mays RRLIIIGAEELGGPRLWAWLTSAYFMMLWVVFVVLSSKRVSGVI  
S.bicolor RRLIIIGAEELGGPRLWAWLTSAYFMMLWVVFVVLSSKRVSGVI  
S.italica RRLIIIGAEELGGPRLWAWLTSAYFMMLWVVFVVLSSKRVSGII  
S.moellendorffii RRLTLGAEELGGPRLWAWLTSAYFMMLWVVFVVLSSKRVSGII  
P.patens\_1 RRFLLGAEELGGPRLWAWLTSAYFMMLWVVFVVLSSKRVSGII  
P.patens\_2 RRFLLGAEELGGPRLWAWLTSAYFMMLWVVFVVLSSKRVSGII  
consensus>50 RRL.lgaELGGPrLWawvtsyvfmlLWvVfVvllssL.vsgii
