# Supplementary material for: Phylogeny and a structural model of plant MHX transporters
Source: PubMed Central journal article supplement (PMC3679957; doi:10.1186/1471-2229-13-75), 2013-05-02
Supplement: 1471-2229-13-75-S7.pdf [file 1471-2229-13-75-S7.pdf]

**Additional file 7. Alignment of NCX proteins**

The file presents the alignment of all NCX proteins that were utilized as markers or identified in this work (excluding CrNCX). See the legends of Additional file 5 for details of sequence alignment and color annotation.

|                      | 1                                             | 10                                                               |
|----------------------|-----------------------------------------------|------------------------------------------------------------------|
| H.sapiens_NCX1.1     | .....                                         | MYNMRRLSLSPTFSMGFHL                                              |
| P.troglodytes_NCX1.1 | .....                                         | MYNMRRLSLSPTFSMGFHL                                              |
| C.familiaris_NCX1.1  | .....                                         | MLQLRLLPPTFSMGCHL                                                |
| F.catus_NCX1.1       | .....                                         | MLRLRLSPTFSVGFHL                                                 |
| C.porcellus_NCX1.1   | .....                                         | MLRLSLSPTYSLGFHL                                                 |
| B.taurus_NCX1.1      | .....                                         | MLQFSLSPTLSMGFHV                                                 |
| R.norvegicus_NCX1.1  | .....                                         | MLRLSLPPNVSMGFRL                                                 |
| M.musculus_NCX1.1    | .....                                         | MLRLSLPPNVSMGFRL                                                 |
| M.mulatta_NCX1.3     | .....                                         | MRRLSLSPTFSMGFHL                                                 |
| O.cuniculus_NCX1.2   | .....                                         | MPRFSLSPFFSMGFHL                                                 |
| S.tropicalis_NCX1    | .....                                         | MMKLGTSLAFFARFHF                                                 |
| O.mossambicus_NCX1.1 | .....                                         | MSPVRTVPMFFTYKLIFFATVIS                                          |
| O.mykiss_NCX1        | .....                                         | MRRTGTSSFLFCALQTLVLLAVFS                                         |
| D.rerio_NCX1a        | .....                                         | MGQSGTSSYFSLALNLSIFLLVFS                                         |
| H.sapiens_NCX3.3     | .....                                         | MAWLRLQPLTSAFLHFGL                                               |
| R.norvegicus_NCX3.3  | .....                                         | MAWLRLQPLTSAFLHFGL                                               |
| M.musculus_NCX3.1    | .....                                         | MAWLRLQPLTSAFLHFGL                                               |
| G.gallus_NCX3        | .....                                         | MAWLSLQPLTSAFLHFGL                                               |
| D.rerio_NCX4a        | .....                                         | MFHLRLSRFSFSSITPCL                                               |
| T.nigroviridis_NCX4a | .....                                         | .....MPHTLI                                                      |
| H.sapiens_NCX2.1     | .....                                         | MAPLALVGVTLTL                                                    |
| R.norvegicus_NCX2.1  | .....                                         | MAPLALVGVALLL                                                    |
| M.musculus_NCX2.1    | .....                                         | MAPLALMGLVLLL                                                    |
| S.kowalevskii_3      | .....                                         | MMKLLCSILSRTLSELTTRGVGASALLLVAVFL                                |
| T.adhaerens_2        | .....                                         | MQLFSALLWVIAVVVLFKVDPTLGSSIIISERD                                |
| L.opalescens_NCX     | MNPFKISFSWGVPLFLLGLFFDFAHASEDSNDTCTTEAET..... | .....                                                            |
| A.mellifera_NCX      | .....                                         | .....                                                            |
| D.melanogaster_NCX   | .....                                         | MQLLLKSIFTCALFVIFVYATAQSLKQVQETEARQAYLNVTSSSSSNLSQDDGHFLSRRLRQVS |
| H.magnipapillata     | .....                                         | .....MQFVLT                                                      |
| C.elegans_NCX1       | .....                                         | .....MTKLLKIYLFVLSLT                                             |
| C.briggsae_NCX1      | .....                                         | .....MRVSLKTTITNAMTKLKIILFLVSVFG                                 |
| C.elegans_NCX2       | .....                                         | .....                                                            |
| C.briggsae_NCX2      | .....                                         | .....                                                            |
| T.spiralis           | .....                                         | .....                                                            |
| M.brevicollis_1      | .....                                         | .....MRPQTWPAWAVLAMLV                                            |
| Salpingoeca          | .....                                         | .....MVRGLSL                                                     |
| S.kowalevskii_1      | .....                                         | .....                                                            |
| S.kowalevskii_2      | .....                                         | .....                                                            |
| T.adhaerens_1        | .....                                         | .....                                                            |
| D.pulex_1            | .....                                         | .....                                                            |
| P.humanus_corporis   | .....                                         | .....                                                            |
| O.dioica             | .....                                         | .....                                                            |
| A.pisum              | .....                                         | .....                                                            |
| P.marinus            | .....                                         | .....MIGLSLWG                                                    |
| A.anophagefferens_1  | .....                                         | .....                                                            |
| E.huxleyi            | .....                                         | .....                                                            |
| C.intestinalis       | .....                                         | .....                                                            |
| B.floridae           | .....                                         | .....                                                            |
| T.adhaerens_3        | .....                                         | .....                                                            |
| N.vectensis_2        | .....                                         | .....                                                            |
| consensus>50         | .....                                         | .....                                                            |

|                      | 20      | 30      | 40       | 50      | 60      | 70                 | 80              |
|----------------------|---------|---------|----------|---------|---------|--------------------|-----------------|
| H.sapiens_NCX1.1     | LVTVSL  | LFSHVD  | HVIAET   | EMEGEG  | NETGEC  | TGSYY              | CKKGVILPIWE     |
| P.troglodytes_NCX1.1 | LVIVTLL | FSHVDH  | VIAETEM  | EGEGNET | GECTGS  | YCKKGVILPIWE       | PQ.DPSFGDKI     |
| C.familiaris_NCX1.1  | LAVVALL | FSHVDL  | ISAETEM  | EGEGNET | GECTGS  | YCKKGVILPIWE       | PQ.DPSFGDKI     |
| F.catus_NCX1.1       | LAFVPL  | LFSHVD  | LISADTE  | MEGEGNE | TGECTGS | YCKKGVILPIWE       | PQ.DPSFGDKI     |
| C.porcullus_NCX1.1   | LAMMTLL | ISHVDH  | ITAETEM  | VEGEGNE | TGECTGS | YCKKGVILPIWE       | PQ.DPSFGDKI     |
| B.taurus_NCX1.1      | IAMVALL | FSHVDH  | ISAETEM  | EGEGNET | GECTGS  | YCKKGVILPIWE       | PQ.DPSFGDKI     |
| R.norvegicus_NCX1.1  | VTLVALL | FTHVDH  | ITADTEA  | ETGGNET | TTECTGS | YCKKGVILPIWE       | PQ.DPSFGDKI     |
| M.musculus_NCX1.1    | VALVALL | FSHVDH  | ITADTEA  | ETGGNET | TTECTGS | YCKKGVILPIWE       | PQ.DPSFGDKI     |
| M.mulatta_NCX1.3     | LIVALL  | FSHVDY  | VIAETEM  | EGEGNET | GECTGS  | YCKKGVILPIWE       | PQ.DPSFGDKI     |
| O.cuniculus_NCX1.2   | LAIVALL | FFRVDH  | VSAETEM  | EGEGNET | GECTGS  | YCKKGVILPIWE       | PQ.DPSFGDKI     |
| S.stropicalis_NCX1   | LVLALL  | LLCNGV  | SIRSETT  | TVADFEN | HTDSTCS | YCKKGVILPIWE       | PQ.NPSFGDKI     |
| M.mossambicus_NCX1.1 | TEFFYS  | AAGSTL  | TLT...TS | NQTATN  | HSKCGS  | TDCKIEGVILPLWK     | PE.NPAFTDRL     |
| O.mykiss_NCX1        | SEIKFVT | AGNSNP  | SLGTNSS  | IGNQTN  | KKCDSV  | DECKVGVILPIWL      | PE.NTSFGDKL     |
| D.rerio_NCX1a        | YELTPVI | AGSSKSS | LDVDTSN  | ANSNQET | CGGSY   | ECKEGLVILPIW       | TPV.NPSFGDKL    |
| H.sapiens_NCX3.3     | VTFVLL  | FLNGLR  | AEAGSG   | DVPSTG  | QNNESC  | SGSSDCKEGLVILPIW   | YPE.NPSLGDKI    |
| R.norvegicus_NCX3.3  | VTFVLL  | FLNGLR  | AEAGDL   | RDPVSA  | GQNNESC | SGSSDCKEGLVILPIW   | YPE.NPSLGDKI    |
| M.musculus_NCX3.1    | VTFVLL  | FLNGLR  | AEAGSD   | VPSAGQ  | NNESC   | SGSSDCKEGLVILPIW   | YPE.NPSLGDKI    |
| G.gallus_NCX3        | VTFVLL  | FLHGLQ  | VDAGLT   | GDSTSS  | VQNS    | SCSGSFDCKEGLVILPIW | YPE.NPSLGDKI    |
| D.rerio_NCX4a        | SSVLLL  | LIFLSG  | LHLSQAS  | GDASHS  | GPNGCS  | GEDSCSEGVVLP       | INPQ.NPSVGDKV   |
| T.nigroviridis_NCX4a | SIVLLL  | FPVTRF  | SHSGV    | SHEDAGR | TTGNCS  | EDNCPSEGVVLP       | LNWNPQ.NPAVGDKV |
| H.sapiens_NCX2.1     | AAPPCSG | AATPTPS | LPPPPAN  | DSDTST  | GGCQGS  | YRCQPGLVLP         | WVEPD.DPSLGDKA  |
| R.norvegicus_NCX2.1  | GAPHC   | LGEATPT | PSLPPPP  | ANDSDA  | SPGGCQ  | GSYRCQPGLVLP       | WVEPD.DPSLGDKA  |
| M.musculus_NCX2.1    | GVPHCL  | GEATPT  | PSLPPPP  | ANDSDA  | SPGGCQ  | GSYRCQPGLVLP       | WVEPD.DPSLGDKA  |
| H.sapiens_NCX2.1     | NPHPTL  | TQETFR  | NSTYPP   | VWDGEE  | EEVCSR  | NATACKPGLVLP       | KWTPD.PVNVGDV   |
| T.adhaerens_2        | VSTINST | STPTLS  | DAEKRL   | IACNTT  | TRCKNG  | LFLPHWPY           | PKDSKGNIL       |
| L.opalescens_NCX     | .....   | .....   | .....    | .....   | .....   | .....              | .....           |
| A.mellifera_NCX      | .....   | .....   | .....    | .....   | .....   | .....              | .....           |
| D.melanogaster_NCX   | HGEEG   | DEGAPS  | QMDDE    | LEQMTK  | VHGEA   | PAEDV              | RECEGLVLP       |
| H.magnipapillata     | FVFIW   | FVNAV   | FANETI   | IIFTN   | ITVKNT  | CRTLEN             | LKCKPGLVLP      |
| C.elegans_NCX1       | TLGQY   | AAEPON  | GEI      | IHVSS   | QRIPGE  | PEPACAPAK          | PCSPGVI         |
| C.briggsae_NCX1      | QFQ..   | AQQQ    | NGTE     | VVRV    | FSQRL   | PSPED              | TACPAK          |
| C.elegans_NCX2       | .MTRLG  | CWLAV   | AFLVAL   | AGLAD   | AGSNCS  | AAADAT             | TRNCIDGLV       |
| C.briggsae_NCX2      | .MTRLG  | CWLAV   | AFLVAL   | AGLAD   | AGSNCS  | AAADAT             | TRNCIDGLV       |
| T.spiralis           | .....   | .....   | .....    | .....   | .....   | .....              | .....           |
| M.brevicollis_1      | AACVVP  | GLAQAP  | GPEPR    | PSDPP   | CSDTV   | LSQGT              | PICKGGS         |
| Salpingoeca          | ALVATT  | VIVLS   | LSLVAG   | VHGEPC  | GDRI    | VNNTK              | PICKGGS         |
| S.kowalevskii_1      | .....   | .....   | .....    | .....   | .....   | .....              | .....           |
| S.kowalevskii_2      | .....   | .....   | .....    | .....   | .....   | .....              | .....           |
| T.adhaerens_1        | .....   | .....   | .....    | .....   | .....   | .....              | .....           |
| D.pulex_1            | .....   | .....   | .....    | .....   | .....   | .....              | .....           |
| P.humanus_corporis   | .....   | .....   | .....    | .....   | .....   | .....              | .....           |
| O.dioica             | .....   | .....   | .....    | .....   | .....   | .....              | .....           |
| A.pisum              | .....   | .....   | .....    | .....   | .....   | .....              | .....           |
| P.marinus            | VDSPRS  | LATPVI  | EQPI     | ICEHGG  | SLVLE   | DRLMG              | YVEGSH          |
| A.anophagefferens_1  | .....   | .....   | .....    | .....   | .....   | .....              | .....           |
| E.huxleyi            | .....   | .....   | .....    | .....   | .....   | .....              | .....           |
| C.intestinalis       | .....   | .....   | .....    | .....   | .....   | .....              | .....           |
| B.floridae           | .....   | .....   | .....    | .....   | .....   | .....              | .....           |
| T.adhaerens_3        | .....   | .....   | .....    | .....   | .....   | .....              | .....           |
| N.vectensis_2        | .....   | .....   | .....    | .....   | .....   | .....              | .....           |
| consensus>50         | .....   | .....   | .....    | .....   | .....   | .....              | .....           |

.....c..gvilpiw.pq.d.s.gd..ara.vyfvval.ym

|                      | 90            | 100      | 110       | 120                        | 130       | 140                |                       |
|----------------------|---------------|----------|-----------|----------------------------|-----------|--------------------|-----------------------|
| H.sapiens_NCX1.1     | FLGVSIIADRFMS | SIEVITS  | QEKEITIK  | KPNGETTKTT                 | .....     | VRIWNETVSNLTLMA    |                       |
| P.troglodytes_NCX1.1 | FLGVSIIADRFMS | SIEVITS  | QEKEITIK  | KPNGETTKTT                 | .....     | VRIWNETVSNLTLMA    |                       |
| C.familiaris_NCX1.1  | FLGVSIIADRFMS | SIEVITS  | QEKEITIK  | KPNGETTKTT                 | .....     | VRIWNETVSNLTLMA    |                       |
| F.catus_NCX1.1       | FLGVSIIADRFMS | SIEVITS  | QEKEITIK  | KPNGETTKTT                 | .....     | VRIWNETVSNLTLMA    |                       |
| C.porcellus_NCX1.1   | FLGVSIIADRFMS | SIEVITS  | QEKEITIK  | KPNGETTKTT                 | .....     | VRIWNETVSNLTLMA    |                       |
| B.taurus_NCX1.1      | FLGVSIIADRFMS | SIEVITS  | QEKEITIK  | KPNGETTKTT                 | .....     | VRIWNETVSNLTLMA    |                       |
| R.norvegicus_NCX1.1  | FLGVSIIADRFMS | SIEVITS  | QEKEITIK  | KPNGETTKTT                 | .....     | VRIWNETVSNLTLMA    |                       |
| M.musculus_NCX1.1    | FLGVSIIADRFMS | SIEVITS  | QEKEITIK  | KPNGETTKTT                 | .....     | VRIWNETVSNLTLMA    |                       |
| M.mulatta_NCX1.3     | FLGVSIIADRFMS | SIEVITS  | QEKEITIK  | KPNGETTKTT                 | .....     | VRIWNETVSNLTLMA    |                       |
| O.cuniculus_NCX1.2   | FLGVSIIADRFMS | SIEVITS  | QEKEITIK  | KPNGETTKTT                 | .....     | VRIWNETVSNLTLMA    |                       |
| S.tropicalis_NCX1    | FLGVSIIADRFMS | SIEVITS  | QEKEITIK  | KPNGETTKTT                 | .....     | VRIWNETVSNLTLMA    |                       |
| O.mossambicus_NCX1.1 | FLGVSIIADRFMS | SIEVITS  | QEREITIK  | KPNGETKITT                 | .....     | VRIWNETVSNLTLMA    |                       |
| O.mykiss_NCX1        | FLGVSIIADRFMS | SIEVITS  | QEREITIK  | KPNGETKITT                 | .....     | VRIWNETVSNLTLMA    |                       |
| D.rerio_NCX1a        | FLGVSIIADRFMS | SIEVITS  | QEKEITIK  | KPNGETTTTT                 | .....     | VRIWNETVSNLTLMA    |                       |
| H.sapiens_NCX3.3     | FLGVSIIADRFMS | SIEVITS  | QEREVTIK  | KPNGETSTTT                 | .....     | IRVWNETVSNLTLMA    |                       |
| R.norvegicus_NCX3.3  | FLGVSIIADRFMS | SIEVITS  | QEREVTIK  | KPNGETSTTT                 | .....     | IRVWNETVSNLTLMA    |                       |
| M.musculus_NCX3.1    | FLGVSIIADRFMS | SIEVITS  | QEREVTIK  | KPNGETSTTT                 | .....     | IRVWNETVSNLTLMA    |                       |
| G.gallus_NCX3        | FLGVSIIADRFMS | SIEVITS  | QEKEITIK  | KPNGETTTTT                 | .....     | IRVWNETVSNLTLMA    |                       |
| D.rerio_NCX4a        | FLGVSIIADRFMS | SIEVITS  | QEKEITIK  | KPNGETTTTT                 | .....     | VRIWNETVSNLTLMA    |                       |
| T.nigroviridis_NCX4a | FLGVSIIADRFMS | SIEVITS  | QEKEITIK  | KPNGETTTTT                 | .....     | VRIWNETVSNLTLMA    |                       |
| H.sapiens_NCX2.1     | FLGVSIIADRFMS | AAIEVITS | KEKEITIT  | KANGETS                    | TSVGT     | VRIWNETVSNLTLMA    |                       |
| R.norvegicus_NCX2.1  | FLGVSIIADRFMS | AAIEVITS | KEKEITIT  | KANGETS                    | TSVGT     | VRIWNETVSNLTLMA    |                       |
| M.musculus_NCX2.1    | FLGVSIIADRFMS | AAIEVITS | KEKEITIT  | KANGETS                    | TSVGT     | VRIWNETVSNLTLMA    |                       |
| S.kowalevskii_3      | FLGVSIVADRFMS | AAIEVITS | KEKEVTVK  | RPNGETKVVVS                | .....     | VRIWNETVSNLTLMA    |                       |
| T.adhaerens_2        | FLGVSIIIDRFMS | AAIEVITS | KERFIKVK  | MSNGEYKRIS                 | .....     | VRVWNETVSNLTLMA    |                       |
| L.opalescens_NCX     | FLGVSIIIDRFMS | AAIEVITS | KEKLVVVK  | KPDGTTVVN                  | .....     | VRIWNETVSNLTLMA    |                       |
| A.mellifera_NCX      | FLGVSIIIDRFMS | AAIEVITS | KEKLVVVK  | RQKGPQIVV                  | .....     | VRVWNETVSNLTLMA    |                       |
| D.melanogaster_NCX   | FVGVSIIADRFMS | AAIEVITS | IERAVVVK  | GPNTKQVMH                  | .....     | VRIWNETVANLTLMA    |                       |
| H.magnipapillata     | FLGVSIIIDRFMS | SIEVITS  | KEKEVLVD  | RVTGKHSVT                  | .....     | VKIWNETVANLTLMA    |                       |
| C.elegans_NCX1       | FFGVSIVADRFMS | SIEVITS  | QKSKVKMK  | KITGEHFTIM                 | .....     | VRVWNETVSNLTLMA    |                       |
| C.briggsae_NCX1      | FFGVSIVADRFMS | SIEVITS  | QKSKVKMK  | KITGEPFTVL                 | .....     | VRVWNETVSNLTLMA    |                       |
| C.elegans_NCX2       | FLGISIVADRFMS | SIEVITS  | MERTIVVK  | RPGLDPMVQ                  | .....     | VRIWNETVSNLTLMA    |                       |
| C.briggsae_NCX2      | FLGISIVADRFMS | SIEVITS  | MERTIVVK  | RPGLDPMVQ                  | .....     | VRIWNETVSNLTLMA    |                       |
| T.spiralis           | FVGVAIADRFMS  | CAIEVITS | TKRTLKLT  | TAIDETGSVLEQYQ             | .....     | EVLWNETVANLTLMA    |                       |
| M.brevicollis_1      | FAGVGIIIDRFMS | AAIEVITS | RERHVMV   | DGI                        | .....     | ETVLIWNETVANLTLMA  |                       |
| Salpingoeca          | FSGIGIIIDRFMS | AAIEVITS | KEKEVKLKD | GR                         | .....     | VVHVQVWNETVANLTLMA |                       |
| S.kowalevskii_1      | FMGVSIIADRFMS | SIEVITS  | KTKTVNIA  | NPKAPGGTEE                 | .....     | IKVRVWNETVANLTLMA  |                       |
| S.kowalevskii_2      | LYGVSIIIDRFMS | SIEVITS  | KTKTVNIA  | NPKAPGGTQK                 | .....     | LKVRVWNETVANLTLMA  |                       |
| T.adhaerens_1        | FLGVAIIADRFMS | CAIEVITS | QTRRIKISD | KDGNMKE                    | .....     | VEVRIWNETVANLTLMA  |                       |
| D.pulex_1            | FTGVAAIADRFMS | GAIEVITS | TTRKVFINH | RSRSEPEV                   | .....     | IEVRIWNETVANLTLMA  |                       |
| P.humanus_corporis   | FVGVSIVADRFMS | SIEVITS  | QTKKVVYLG | KFKKKPESESALNVTATSTHQLDFIE | .....     | VRVWNETVANLTLMA    |                       |
| O.dioica             | FLGVAIVADRFMS | SIEVITS  | RETHITILV | DGOPEKQ                    | .....     | KVRFWNETVANLTLMA   |                       |
| A.pisum              | LLGISIVADRFMS | TAIDKITS | SHTKKVYLA | KEKPN                      | GSDVSLRPD | .....              | QPEVIEVRIWNETVANLTLMA |
| P.marinus            | FVGVAIIIDRFMS | GAIEVITS | KKKRARLTI | QGETK                      | .....     | LVTVRVWNETVANLTLMA |                       |
| A.anophagefferens_1  | FLGVSIIADRFMS | AAIEVITS | KEKVPVGTD | .....                      | .....     | VWNETVANLTLMA      |                       |
| E.huxleyi            | FLGVAIAADRFMS | LGIEVITS | QEQAQTVV  | DGRKR                      | .....     | VYSLKIWNETVANLTLMA |                       |
| C.intestinalis       | FLGVAIGSDRFMS | SIEVITS  | KKRRTIILW | DEELGENTKK                 | .....     | EVLWNETVANLTLMA    |                       |
| B.floridae           | FIGITIGSDRFMS | SIEVITS  | KKRKVVRWD | DEERQETVER                 | .....     | EVLWNETVANLTLMA    |                       |
| T.adhaerens_3        | FVGVAIVADRFMS | GAIEVITS | KKKTVITYD | RETGEQATK                  | .....     | EVLWNETVANLTLMA    |                       |
| N.vectensis_2        | FLGVAIVADRFMS | CAIEVITS | KKRKYTRYD | HEKGE                      | SVEI      | .....              | EVLWNETVANLTLMA       |
| consensus>50         | flGvs!iadrFM  | s!evITS  | qekeitik  | kpnge                      | .....     | vriwNet!sNlTLma    |                       |

|                      | 150               | 160        | 170                    | 180        | 190          | 200 |
|----------------------|-------------------|------------|------------------------|------------|--------------|-----|
| H.sapiens_NCX1.1     | LGSSAPEIILLSVIEVC | .....GHNFT | AGDGLPSTIVGSAAFNMFIIAL | CVYVVPDGET | RKIKHLRVFFV  |     |
| P.troglodytes_NCX1.1 | LGSSAPEIILLSVIEVC | .....GHNFT | AGDGLPSTIVGSAAFNMFIIAL | CVYVVPDGET | RKIKHLRVFFV  |     |
| C.familiaris_NCX1.1  | LGSSAPEIILLSVIEVC | .....GHNFT | AGDGLPSTIVGSAAFNMFIIAL | CVYVVPDGET | RKIKHLRVFFV  |     |
| F.catus_NCX1.1       | LGSSAPEIILLSVIEVC | .....GHNFT | AGDGLPSTIVGSAAFNMFIIAL | CVYVVPDGET | RKIKHLRVFFV  |     |
| C.porcullus_NCX1.1   | LGSSAPEIILLSVIEVC | .....GHNFT | AGDGLPSTIVGSAAFNMFIIAL | CVYVVPDGET | RKIKHLRVFFV  |     |
| B.taurus_NCX1.1      | LGSSAPEIILLSVIEVC | .....GHNFT | AGDGLPSTIVGSAAFNMFIIAL | CVYVVPDGET | RKIKHLRVFFV  |     |
| R.norvegicus_NCX1.1  | LGSSAPEIILLSVIEVC | .....GHNFT | AGDGLPSTIVGSAAFNMFIIAL | CVYVVPDGET | RKIKHLRVFFV  |     |
| M.musculus_NCX1.1    | LGSSAPEIILLSVIEVC | .....GHNFT | AGDGLPSTIVGSAAFNMFIIAL | CVYVVPDGET | RKIKHLRVFFV  |     |
| M.mulatta_NCX1.3     | LGSSAPEIILLSVIEVC | .....GHNFT | AGDGLPSTIVGSAAFNMFIIAL | CVYVVPDGET | RKIKHLRVFFV  |     |
| O.uniculus_NCX1.2    | LGSSAPEIILLSVIEVC | .....GHNFT | AGDGLPSTIVGSAAFNMFIIAL | CVYVVPDGET | RKIKHLRVFFV  |     |
| S.tropicalis_NCX1    | LGSSAPEIILLSVIEVC | .....GHNFT | AGDGLPSTIVGSAAFNMFIIAL | CVYVVPDGET | IRKIKHLRVFFV |     |
| O.mossambicus_NCX1.1 | LGSSAPEIILLSVIEVC | .....GHNFT | AGDGLPSTIVGSAAFNMFIIAL | CVYVVPDGET | RKIKHLRVFFV  |     |
| O.mykiss_NCX1        | LGSSAPEIILLSVIEVC | .....GHNFT | AGDGLPSTIVGSAAFNMFIIAL | CVYVVPDGET | HRKVKHLRVFFV |     |
| D.rerio_NCX1a        | LGSSAPEIILLSVIEVC | .....GHNFT | AGDGLPSTIVGSAAFNMFIIAL | CVYVVPDGET | HRKVKHLRVFFV |     |
| H.sapiens_NCX3.3     | LGSSAPEIILLSLIEVC | .....GHGFI | AGDGLPSTIVGSAAFNMFIIAL | CVYVVPDGET | RKIKHLRVFFV  |     |
| R.norvegicus_NCX3.3  | LGSSAPEIILLSLIEVC | .....GHGFI | AGDGLPSTIVGSAAFNMFIIAL | CVYVVPDGET | RKIKHLRVFFV  |     |
| M.musculus_NCX3.1    | LGSSAPEIILLSLIEVC | .....GHGFI | AGDGLPSTIVGSAAFNMFIIAL | CVYVVPDGET | RKIKHLRVFFV  |     |
| G.gallus_NCX3        | LGSSAPEIILLSLIEVC | .....GHGFI | AGDGLPSTIVGSAAFNMFIIAL | CVYVVPDGET | RKIKHLRVFFV  |     |
| D.rerio_NCX4a        | LGSSAPEIILLSVIEVC | .....GHKFE | AGHLGPSTIVGSAAFNMFIIAL | CVYVVPDGET | VRKIKHLRVFFV |     |
| T.nigroviridis_NCX4a | LGSSAPEIILLSVIEVC | .....GHNFT | AGDGLPSTIVGSAAFNMFIIAL | CVYVVPDGET | RRKIKHLRVFFV |     |
| H.sapiens_NCX2.1     | LGSSAPEIILLSVIEVC | .....GHNFT | AGDGLPSTIVGSAAFNMFIIAL | CVYVVPDGET | RRKIKHLRVFFV |     |
| R.norvegicus_NCX2.1  | LGSSAPEIILLSVIEVC | .....GHNFT | AGDGLPSTIVGSAAFNMFIIAL | CVYVVPDGET | RRKIKHLRVFFV |     |
| M.musculus_NCX2.1    | LGSSAPEIILLSVIEVC | .....GHNFT | AGDGLPSTIVGSAAFNMFIIAL | CVYVVPDGET | RRKIKHLRVFFV |     |
| S.kowalevskii_3      | LGSSAPEIILLSLIEVC | .....GNGFH | AGDGLPSTIVGSAAFNMFIIAL | CVYVVPDGET | RRKIKHLRVFFV |     |
| T.adhaerens_2        | LGSSAPEIILLSLIEVC | .....GNGFH | AGDGLPSTIVGSAAFNMFIIAL | CVYVVPDGET | RRKIKHLRVFFV |     |
| L.opalescens_NCX     | LGSSAPEIILLSVIEVC | .....GQKFE | AGDGLPSTIVGSAAFNMFIIAL | CVYVVPDGET | RTIKHLRVFFV  |     |
| A.mellifera_NCX      | LGSSAPEIILLSVIEVC | .....AKNFE | AGDGLPSTIVGSAAFNMFIIAL | CVYVVPDGET | RRKIKHLRVFFV |     |
| D.melanogaster_NCX   | LGSSAPEIILLSVIEVC | .....AKNFE | AGDGLPSTIVGSAAFNMFIIAL | CVYVVPDGET | RRKIKHLRVFFV |     |
| H.magnipapillata     | LGSSAPEIILLSVIEVC | .....GQKFE | AGDGLPSTIVGSAAFNMFIIAL | CVYVVPDGET | RRKIKHLRVFFV |     |
| C.elegans_NCX1       | LGSSAPEIILLSVIEVC | .....GNNFE | AGDGLPSTIVGSAAFNMFIIAL | CVYVVPDGET | RRVQHNGVFFV  |     |
| C.briggsae_NCX1      | LGSSAPEIILLSVIEVC | .....GNNFE | AGDGLPSTIVGSAAFNMFIIAL | CVYVVPDGET | RRVQHNGVFFV  |     |
| C.elegans_NCX2       | LGSSAPEIILLSVIEVC | .....GNNFE | AGDGLPSTIVGSAAFNMFIIAL | CVYVVPDGET | RRVQHNGVFFV  |     |
| C.briggsae_NCX2      | LGSSAPEIILLSVIEVC | .....GNNFE | AGDGLPSTIVGSAAFNMFIIAL | CVYVVPDGET | RRVQHNGVFFV  |     |
| T.spiralis           | LGSSAPEIILLSVIEVC | .....ARGFE | AGDGLPSTIVGSAAFNMFIIAL | CVYVVPDGET | IRRQKHLRVFFV |     |
| M.brevicollis_1      | LGSSAPEIILLSVIEVC | .....GNGFH | AGDGLPSTIVGSAAFNMFIIAL | CVYVVPDGET | RRKIKHLRVFFV |     |
| Salpingoeca          | LGSSAPEIILLSVIEVC | .....AGEFF | AGALGPSTIVGSAAFNMFIIAL | CVYVVPDGET | RRLESMGVFFV  |     |
| S.kowalevskii_1      | LGSSAPEIILLSVIEVC | .....AGNFF | AGALGPSTIVGSAAFNMFIIAL | CVYVVPDGET | RRLESMGVFFV  |     |
| S.kowalevskii_2      | LGSSAPEIILLSVIEVC | .....GNGFH | AGDGLPSTIVGSAAFNMFIIAL | CVYVVPDGET | RRYIKLVKVFAL |     |
| T.adhaerens_1        | LGSSAPEIILLSVIEVC | .....GNGFH | AGDGLPSTIVGSAAFNMFIIAL | CVYVVPDGET | RRYIKLVKVFAL |     |
| D.pulex_1            | LGSSAPEIILLSVIEVC | .....GNNFK | AGDGLPSTIVGSAAFNMFIIAL | CVYVVPDGET | RRYIKLVKVFAL |     |
| P.humanus_corporis   | LGSSAPEIILLSVIEVC | .....GNNFK | AGDGLPSTIVGSAAFNMFIIAL | CVYVVPDGET | RRYIKLVKVFAL |     |
| O.dioica             | MGSSMPEIILLNIEIV  | .....FNNFE | AGDGLPSTIVGSAAFNMFIIAL | CVYVVPDGET | RRYIKLVKVFAL |     |
| A.pisum              | LGSSAPEIILLSVIEVC | .....GNNFK | AGDGLPSTIVGSAAFNMFIIAL | CVYVVPDGET | RRYIKLVKVFAL |     |
| P.marinus            | LGSSAPEIILLSVIEVC | .....GNNFK | AGDGLPSTIVGSAAFNMFIIAL | CVYVVPDGET | RRYIKLVKVFAL |     |
| A.anophagefferens_1  | LGSSAPEIILLSVIEVC | .....GNNFK | AGDGLPSTIVGSAAFNMFIIAL | CVYVVPDGET | RRYIKLVKVFAL |     |
| E.huxleyi            | LGSSAPEIILLSVIEVC | .....GNNFK | AGDGLPSTIVGSAAFNMFIIAL | CVYVVPDGET | RRYIKLVKVFAL |     |
| C.intestinalis       | LGSSAPEIILLSVIEVC | .....GNNFK | AGDGLPSTIVGSAAFNMFIIAL | CVYVVPDGET | RRYIKLVKVFAL |     |
| B.floridiae          | LGSSAPEIILLSVIEVC | .....GNNFK | AGDGLPSTIVGSAAFNMFIIAL | CVYVVPDGET | RRYIKLVKVFAL |     |
| T.adhaerens_3        | LGSSAPEIILLSVIEVC | .....GNNFK | AGDGLPSTIVGSAAFNMFIIAL | CVYVVPDGET | RRYIKLVKVFAL |     |
| N.vectensis_2        | LGSSAPEIILLSVIEVC | .....GNNFK | AGDGLPSTIVGSAAFNMFIIAL | CVYVVPDGET | RRYIKLVKVFAL |     |
| consensus>50         | LGSSAPEIILLSVIEVC | .....GNNFK | AGDGLPSTIVGSAAFNMFIIAL | CVYVVPDGET | RRYIKLVKVFAL |     |

|                      | 210 | 220 | 230   | 240 | 250   | 260  | 270 |
|----------------------|-----|-----|-------|-----|-------|------|-----|
| H.sapiens_NCX1.1     | TA  | AW  | SIFAY | TW  | LYIIL | SV   | IS  |
| P.troglodytes_NCX1.1 | TA  | AW  | SIFAY | TW  | LYIIL | SV   | IS  |
| C.familiaris_NCX1.1  | TA  | AW  | SIFAY | TW  | LYIIL | SV   | IS  |
| F.catus_NCX1.1       | TA  | AW  | SIFAY | TW  | LYIIL | SV   | IS  |
| C.porcullus_NCX1.1   | TA  | AW  | SIFAY | TW  | LYIIL | SV   | IS  |
| B.taurus_NCX1.1      | TA  | AW  | SIFAY | TW  | LYIIL | SV   | IS  |
| R.norvegicus_NCX1.1  | TA  | AW  | SIFAY | TW  | LYIIL | SV   | IS  |
| M.musculus_NCX1.1    | TA  | AW  | SIFAY | TW  | LYIIL | SV   | IS  |
| M.mulatta_NCX1.3     | TA  | AW  | SIFAY | TW  | LYIIL | SV   | IS  |
| M.uniculus_NCX1.2    | TA  | AW  | SIFAY | TW  | LYIIL | SV   | IS  |
| S.stropicalis_NCX1   | TA  | AW  | SIFAY | TW  | LYMIL | SV   | IS  |
| O.mossambicus_NCX1.1 | TA  | AW  | SIFAY | TW  | LYLIL | AV   | IS  |
| O.mykiss_NCX1        | TAT | W   | SIFAY | TW  | LYLIL | AV   | IS  |
| D.rerio_NCX1a        | TAT | W   | SIFAY | TW  | LYLIL | AV   | IS  |
| H.sapiens_NCX3.3     | TA  | AW  | SIFAY | TW  | LYMIL | AV   | IS  |
| R.norvegicus_NCX3.3  | TA  | AW  | SIFAY | TW  | LYMIL | AV   | IS  |
| R.musculus_NCX3.1    | TA  | AW  | SIFAY | TW  | LYMIL | AV   | IS  |
| G.gallus_NCX3        | TA  | AW  | SIFAY | TW  | LYMIL | AV   | IS  |
| D.rerio_NCX4a        | TA  | AW  | SIFAY | TW  | LYLIL | SV   | IS  |
| T.nigroviridis_NCX4a | TA  | AW  | SIFAY | TW  | LYLIL | SV   | IS  |
| H.sapiens_NCX2.1     | TAS | W   | SIFAY | TW  | LYLIL | AV   | IS  |
| R.norvegicus_NCX2.1  | TAS | W   | SIFAY | TW  | LYLIL | AV   | IS  |
| M.musculus_NCX2.1    | TAS | W   | SIFAY | TW  | LYLIL | AV   | IS  |
| S.kowalevskii_3      | TAT | C   | S     | L   | F     | A    | Y   |
| T.adhaerens_2        | TAS | C   | S     | V   | F     | A    | Y   |
| L.opalescens_NCX     | TAT | W   | S     | V   | F     | A    | Y   |
| A.mellifera_NCX      | TAT | W   | S     | I   | F     | A    | Y   |
| D.melanogaster_NCX   | TAL | F   | S     | V   | F     | A    | Y   |
| H.magnipapillata     | TAS | C   | S     | M   | F     | A    | Y   |
| C.elegans_NCX1       | T   | V   | W     | S   | T     | F    | A   |
| C.briggsae_NCX1      | T   | V   | W     | S   | T     | F    | A   |
| C.elegans_NCX2       | TAT | W   | S     | V   | F     | A    | Y   |
| C.briggsae_NCX2      | TAT | W   | S     | V   | F     | A    | Y   |
| T.spiralis           | T   | T   | G     | S   | V     | F    | A   |
| M.brevicollis_1      | TAL | F   | S     | I   | F     | A    | Y   |
| S.salpingoeca        | TAL | F   | S     | V   | F     | A    | Y   |
| S.kowalevskii_1      | T   | S   | F     | F   | C     | I    | F   |
| S.kowalevskii_2      | TAA | F   | S     | I   | I     | A    | Y   |
| T.adhaerens_1        | TAT | F   | S     | I   | F     | A    | Y   |
| D.pulex_1            | TAV | F   | S     | I   | L     | A    | Y   |
| P.humanus_corporis   | CS  | I   | F     | S   | I     | L    | A   |
| O.dioica             | TAF | F   | S     | I   | F     | A    | Y   |
| A.pisum              | IG  | A   | F     | S   | F     | F    | A   |
| P.marinus            | TAG | C   | S     | I   | F     | A    | Y   |
| A.anophagefferens_1  | TAF | F   | S     | V   | F     | A    | Y   |
| E.huxleyi            | TAA | A   | S     | V   | F     | A    | Y   |
| C.intestinalis       | T   | S   | L     | W   | S     | M    | S   |
| B.floridae           | T   | S   | L     | W   | S     | M    | S   |
| T.adhaerens_3        | TAI | W   | S     | V   | F     | A    | Y   |
| N.vectensis_2        | TAV | W   | S     | M   | F     | A    | Y   |
| consensus>50         | ta  | .w  | sifAY | vW  | yl    | l.v. | s   |

ta.w.sifAY.vW.yl.l.v.spgvvevW.EgllTf.ffpi.v..awvadrll.yky..k.yr.....g.ii

H.sapiens\_NCX1.1 EHEGDRPS.S.  
P.troglodytes\_NCX1.1 EHEGDRPS.S.  
C.familiaris\_NCX1.1 EHEGDRPS.S.  
F.catus\_NCX1.1 EHEGDRPS.S.  
C.porcellus\_NCX1.1 EHEGDRPS.S.  
B.taurus\_NCX1.1 EHEGDRPS.S.  
R.norvegicus\_NCX1.1 EHEGDRPA.S.  
M.musculus\_NCX1.1 EHEGDRPA.S.  
M.mulatta\_NCX1.3 EHEGDRPS.S.  
O.cuniculus\_NCX1.2 EHEGDRPS.S.  
S.tropicalis\_NCX1 ETEGDRPS.S.  
O.mossambicus\_NCX1.1 ETEGEPELPS.  
O.mykiss\_NCX1 ETEGEAQIPS.  
D.rerio\_NCX1a ETEGEPELQS.  
H.sapiens\_NCX3.3 ETEGDHPKG.  
R.norvegicus\_NCX3.3 ETEGEHPKG.  
M.musculus\_NCX3.1 ETEGDHPKG.  
G.gallus\_NCX3 ESEGDHPKG.  
D.rerio\_NCX4a ETEGDMFT.  
T.nigroviridis\_NCX4a ESEGDAMFT.  
H.sapiens\_NCX2.1 GAEGDPPKSI.  
R.norvegicus\_NCX2.1 GAEGDPPKSI.  
M.musculus\_NCX2.1 GAEGDPPKSI.  
S.kowalevskii\_3 GNHYP.  
T.adhaerens\_2 VEPDSI.  
L.opalescens\_NCX CEGQDAEAGE.  
A.mellifera\_NCX AEAGDSGGV.  
D.melanogaster\_NCX GEHDQVEMDA.  
H.magnipapillata IQTGDDVVA.  
C.elegans\_NCX1 R.  
C.briggsae\_NCX1 R.  
C.elegans\_NCX2 T.  
C.briggsae\_NCX2 T.  
T.spiralis LRELNRRSWT.  
M.brevicollis\_1 IRT.  
Salpingoeca NDV.  
S.kowalevskii\_1 DRY.  
S.kowalevskii\_2 .  
T.adhaerens\_1 DTE.  
D.pulex\_1 SIO.  
P.humanus\_corporis MEE.  
O.dioica NPD.  
A.pisum .  
P.marinus MFS.  
A.anophagefferens\_1 YFD.  
E.huxleyi AFS.  
C.intestinalis DPAMVNGLSRRGSAGVKSPEKSRKMNWTNEGVCVSVSNGDICGGTPNMGSPALKRHRVSI AAPTNPAA  
B.floridae NVRVIGSPQGRASVLNTR.  
T.adhaerens\_3 VGCKSRHPSASIIIRSTSRELSNVHRESVASAHNSTYDLESVTKLNPGENRSRANSARTSIS . . . . . A  
N.vectensis\_2 FTKGLVDRNSLALLRFVRFVKQARNCDVVSKTSRFSHLQVRVLGFTDAPSSHAMIHRSMEL . . . . .  
consensus>50 e.egd . . . . .

|                      | 290                  | 300                | 310              | 320              | 330           |             |
|----------------------|----------------------|--------------------|------------------|------------------|---------------|-------------|
| H.sapiens_NCX1.1     | KTEIEMDGKVVNSHVENFLD | GALVLEVD           | ERDQD            | DEEARREMAR       | ILL           |             |
| P.troglodytes_NCX1.1 | KTEIEMDGKVVNSHVENFLD | GALVLEVD           | ERDQD            | DEEARREMAR       | ILL           |             |
| C.familiaris_NCX1.1  | KTEIEMDGKVVNSHVDNFLD | GALVLEVD           | ERDQD            | DEEARREMAR       | ILL           |             |
| F.catus_NCX1.1       | KTEIEMDGKVVNSHVDNFLD | GALVLEVD           | ERDQD            | DEEARREMAR       | ILL           |             |
| C.porcellus_NCX1.1   | KTEIEMDGKVVNSHVDNFLD | GALVLEVD           | ERDQD            | DEEARREMAR       | ILL           |             |
| B.taurus_NCX1.1      | KTEIEMDGKVVNSHVDNFLD | GALVLEVD           | ERDQD            | DEEARREMAR       | ILL           |             |
| R.norvegicus_NCX1.1  | KTEIEMDGKVVNSHVDNFLD | GALVLEVD           | ERDQD            | DEEARREMAR       | ILL           |             |
| M.musculus_NCX1.1    | KTEIEMDGKVVNSHVDNFLD | GALVLEVD           | ERDQD            | DEEARREMAR       | ILL           |             |
| M.mulatta_NCX1.3     | KTEIEMDGKVVNSHVENFLD | GALVLEVD           | ERDQD            | DEEARREMAR       | ILL           |             |
| O.cuniculus_NCX1.2   | KTEIEMDGKVVNSHVDNFLD | GALVLDVD           | ERDQD            | DEEARREMAR       | ILL           |             |
| S.tropicalis_NCX1    | KADIEMDGKVLNSHTFLD   | GSLVLEVD           | EKQDQ            | DEEARREMAK       | ILL           |             |
| O.mossambicus_NCX1.1 | KVDIEMDGKMLNSHGETF   | TEELE.G.           | KELD             | DEEARREVAR       | ILL           |             |
| O.mykiss_NCX1        | KMDIEMDGKMLNS.S      | SFMDGAM.GFDE       | EKDL             | DEEARREMR        | ILL           |             |
| D.rerio_NCX1a        | KADIEMDGGMLNSHAE     | EFLDGAV.DNE        | EKDDAD           | DEEARREMAK       | ILL           |             |
| H.sapiens_NCX3.3     | IEMDGKMMNSHFLD       | GNLVPLEGEVD        |                  | ESRRREMIR        | ILL           |             |
| R.norvegicus_NCX3.3  | IEMDGKMMNSHFLD       | GNLVPLEGEVD        |                  | ESRRREMIR        | ILL           |             |
| M.musculus_NCX3.1    | IEMDGKMMNSHFLD       | GNFTPLEGEVD        |                  | ESRRREMIR        | ILL           |             |
| G.gallus_NCX3        | IEMDGKMMNSHFLD       | GNLVTVEGEVD        |                  | ESRRREMIR        | ILL           |             |
| D.rerio_NCX4a        | KMDIEMDGGQANSHT      | .KEALDGMLAGV       | E                | EGGGGEE          | DEEARREMAR    | TLL         |
| T.nigroviridis_NCX4a | KMDIEMDGGQVNSHT      | PKAALDGMLEG        | E                | EGGGMISEQDQE     | DEEARREMAR    | TLL         |
| H.sapiens_NCX2.1     | ELDGTFFVGAEPGLGLG    | GLGPAEAREL         | DA               |                  | SRREVIQ       | ILL         |
| R.norvegicus_NCX2.1  | ELDGTFFVGAEPGLGLG    | ALGTGPAEAREL       | DA               |                  | SRREVIQ       | ILL         |
| M.musculus_NCX2.1    | ELDGTFFVGAEPGLGLG    | ALGTGPAEAREL       | DA               |                  | SRREVIQ       | ILL         |
| S.kowalevskii_3      |                      | LSHEYDDVEYRGRF     | E                | DDDELDFEDIKDL    | DESREQE       | AIRILL      |
| T.adhaerens_2        | IMRSPKKEERDSEGF      | NSVYKNNPMDV        | VS               | SIDDVDSEKND      | EMRRKKAMQ     | IV          |
| L.opalescens_NCX     | GKSEDG               | .ALKEGGDDVEVREF    |                  |                  | EQRKKEYIE     | ILL         |
| A.mellifera_NCX      | ELEIKPQ              | QDSFHNMDADTPEAKEF  |                  |                  | EQTRRDYINT    | L           |
| D.melanogaster_NCX   | EKGPKQ               | PMVTSARGNDAEA      | .F               |                  | DEARREYITL    | L           |
| H.magnipapillata     | VSLKSTIKHDSSNDNV     | DEKDIELLPLEE       | DD               | PLEIINDKK        | .KKAMEAF      |             |
| C.elegans_NCX1       | RSPSKKTRENVENGA      | .GLPGDAT           | NL               | IGGDADALAF       | EIHRRHLYD     | IF          |
| C.briggsae_NCX1      | RSPSKKTHENALE        | ESGNGGIPGDQN       | Q                | SLIGGDADALAF     | EIHRRHLYD     | IF          |
| C.elegans_NCX2       | EAEEMKMLENGT         | QG                 |                  | DPALKAF          | EHRQEFIE      | LM          |
| C.briggsae_NCX2      | EAEEMKMLENGS         | PQ                 |                  | GADPALKAF        | EHRQEFIE      | LM          |
| T.spiralis           | GPALNGK              | EKLLDVVEQNRVD      |                  |                  | RLS           |             |
| M.brevicollis_1      |                      | EDGRNIAFDPYDM      |                  |                  | AV            |             |
| Salpingoeca          |                      | EHGQFHDPEAD        |                  |                  | TI            |             |
| S.kowalevskii_1      |                      | LTAENVTKEGVADVM    |                  |                  | KEIGKHPD      | ITPEQ       |
| S.kowalevskii_2      |                      | LGIGNVTREGVADVM    |                  |                  | KEMGKHPD      | ITQEQ       |
| T.adhaerens_1        |                      | NGHLAFDDSTGRLLVPD  | S                | FDKSSANSFLKAVKTR | TDITAE        |             |
| D.pulex_1            |                      | PGELEAMVDGLTLTKD   | Q                | VDPNELAKWVR      | QASRMGLT      | GED         |
| P.humanus_corporis   |                      | SKKIFVERKFKDKGI    | .DKETLYSFFKEL    | KKYPGIS          | NED           |             |
| O.dioica             |                      | TPEGIELLQKQRPNSMAL | VDEFMKDFEGD      | PLTIDEQ          | AAAI          |             |
| A.pisum              |                      |                    | EHNTHQLDLDL      | QNKENLIKFKVN     | VKKYSGIT      | DD          |
| P.marinus            |                      | IKTNV              | ASAHRDHIVGLE     | DLSPDELVD        |               | LM          |
| A.anophagefferens_1  |                      | TAKI               | SPVSSAHVIQVGS    | TPFRPYEFS        |               | DL          |
| E.huxleyi            |                      | CPDK               | ARPATHVVVAFT     | RDGKPIRHSFAR     | E             | AATQWARGDL  |
| C.intestinalis       | AIELASISKDNGR        | KESERRQVEPE        | PAYRAFARFRHAAI   | WSIGRKRKPINLN    | LQPS          | PKLPVNDPKLL |
| B.floridae           | PTELLALEGRNRN        | LNDMDRPSQGG        | OPTNALSRARFRHAAI | VRSMLYK          |               | KAPKPKARFA  |
| T.adhaerens_3        |                      | RSSFVYEDHGKIQVD    | IKPNSFARFRHAAI   | IRSLMG           | GKRHRRS       | KSVTDK      |
| N.vectensis_2        |                      | RALEQHR            | GSVRNSFDRFRHAAI  | RSVTR            | SKKLIKINEGEDV | E           |
| consensus>50         |                      |                    | e.d              |                  | n             | e           |

|                      | 340                                                  | 350             | 360                        | 370             | 380         | 390                      |
|----------------------|------------------------------------------------------|-----------------|----------------------------|-----------------|-------------|--------------------------|
| H.sapiens_NCX1.1     | KELKQKHPDKEI                                         | EQLIELANYQVLS   | QQKSRAFYRIQATRLMTGAGNILK   | RHAAD           | QA.....     | RKAVSMH                  |
| P.troglodytes_NCX1.1 | KELKQKHPDKEI                                         | EQLIELANYQVLS   | QQKSRAFYRIQATRLMTGAGNILK   | RHAAD           | QA.....     | RKAVSMH                  |
| C.familiaris_NCX1.1  | KELKQKHPDKEI                                         | EQLIELANYQVLS   | QQKSRAFYRIQATRLMTGAGNILK   | RHAAD           | QA.....     | RKAVSMH                  |
| F.catus_NCX1.1       | KELKQKHPDKEI                                         | EQLIELANYQVLS   | QQKSRAFYRIQATRLMTGAGNILK   | RHAAD           | QA.....     | RKAVSMH                  |
| C.porcullus_NCX1.1   | KELKQKHPDKEI                                         | EQLIELANYQVLS   | QQKSRAFYRIQATRLMTGAGNILK   | RHAAD           | QA.....     | RKAVSMH                  |
| B.taurus_NCX1.1      | KELKQKHPDKEI                                         | EQLIELANYQVLS   | QQKSRAFYRIQATRLMTGAGNILK   | RHAAD           | QA.....     | RKAVSMH                  |
| R.norvegicus_NCX1.1  | KELKQKHPDKEI                                         | EQLIELANYQVLS   | QQKSRAFYRIQATRLMTGAGNILK   | RHAAD           | QA.....     | RKAVSMH                  |
| M.musculus_NCX1.1    | KELKQKHPDKEI                                         | EQLIELANYQVLS   | QQKSRAFYRIQATRLMTGAGNILK   | RHAAD           | QA.....     | RKAVSMH                  |
| M.mulatta_NCX1.3     | KELKQKHPDKEI                                         | EQLIELANYQVLS   | QQKSRAFYRIQATRLMTGAGNILK   | RHAAD           | QA.....     | RKAVSMH                  |
| O.uniculcus_NCX1.2   | KELKQKHPDKEI                                         | EQLIELANYQVLS   | QQKSRAFYRIQATRLMTGAGNILK   | RHAAD           | QA.....     | RKAVSMH                  |
| S.tropicalis_NCX1    | KELKQKHPDKEI                                         | EQLIELANYQVLS   | QQKSRAFYRIQATRLMTGAGNILK   | RHAAD           | QA.....     | RKAVSMH                  |
| O.mossambicus_NCX1.1 | KELKQKHPDKEI                                         | EQLIELANYQVLS   | QQKSRAFYRCQATRIMTGAGNVLK   | KHACH           | QA.....     | KRAT..H                  |
| O.mykiss_NCX1        | KELKQKHPDKEI                                         | EQLIELANYQVLS   | QQKSRAFYRCQATRIMTGAGNVLK   | KHACH           | QA.....     | RKAVGAY                  |
| D.rerio_NCX1a        | KELKQKHPDKEI                                         | EQLIELANYQVLS   | QQKSRAFYRCQATRIMTGAGNVLK   | KHACH           | QA.....     | RKALGIH                  |
| H.sapiens_NCX3.3     | KDLKQKHPDKEI                                         | DQLEMANYYALSH   | QQKSRAFYRIQATRMMTGAGNILK   | KHAAE           | QA.....     | KKASSMS                  |
| R.norvegicus_NCX3.3  | KDLKQKHPDKEI                                         | DQLEMANYYALSH   | QQKSRAFYRIQATRMMTGAGNILK   | KHAAE           | QA.....     | KKTASMS                  |
| M.musculus_NCX3.1    | KDLKQKHPDKEI                                         | DQLEMANYYALSH   | QQKSRAFYRIQATRMMTGAGNILK   | KHAAE           | QA.....     | KKTSSMS                  |
| G.gallus_NCX3        | KDLKQKHPDKEI                                         | DQLEMANYYALSH   | QQKSRAFYRIQATRMMTGAGNILK   | KHAAE           | QA.....     | KKSTSLH                  |
| D.rerio_NCX4a        | KELKQRHPDKEI                                         | DQLEMANYYALSH   | QQKSRAFYRIQATRMMTGAGNILK   | KHAAE           | QA.....     | RKVVSCH                  |
| T.nigroviridis_NCX4a | KELKQRHPDKEI                                         | DQLEMANYYALSH   | QQKSRAFYRIQATRMMTGAGNILK   | KHAAE           | QA.....     | RRAAPAE                  |
| H.sapiens_NCX2.1     | KDLKQKHPDKEI                                         | DQLEMANYYALSH   | QQKSRAFYRIQATRLMTGAGNVLR   | RHAAD           | AA.....     | RRPGAND                  |
| R.norvegicus_NCX2.1  | KDLKQKHPDKEI                                         | DQLEMANYYALSH   | QQKSRAFYRIQATRLMTGAGNVLR   | RHAAD           | AA.....     | RRPGATD                  |
| M.musculus_NCX2.1    | KDLKQKHPDKEI                                         | DQLEMANYYALSH   | QQKSRAFYRIQATRLMTGAGNVLR   | RHAAD           | AA.....     | RRPGATD                  |
| H.sapiens_NCX3.1     | RDLKQKHPDKEI                                         | DQLEMANYYALSH   | QQKSRAFYRIQATRLMTGAGNVLR   | RHAAD           | AA.....     | RRPGATD                  |
| T.adhaerens_2        | KEIKQNHNPATA                                         | KEIEELASYEAL    | KYQKSRAYRIQATRKLITGSGNVIK  | QRKM            | ..S.....    | LPANPDG                  |
| L.opalescens_NCX     | REMRKKNPTLDM                                         | KTLEMAESEAVNR   | GPKSRAFYRIQATRKLITGSGNLIK  | KAKAQ           | AGVAQPIVD   | QKPED                    |
| A.mellifera_NCX      | RELRRKYPALPL                                         | EQLVMAHEEVLG    | GPKSRAFYRVQATRKMVGAGNLSK   | KISER           | AQSDLSVKA   | EQLKQ                    |
| D.melanogaster_NCX   | TELRQKYPADL                                          | EQLVMAHEEVLG    | GPKSRAFYRIQATRKMVGAGNLSK   | KISER           | AQSDLSVKA   | EQLKQ                    |
| H.magnipapillata     | HRARTKYPADL                                          | EQLVMAHEEVLG    | GPKSRAFYRVQATRKMVGAGNLSK   | KISER           | AQSDLSVKA   | EQLKQ                    |
| C.elegans_NCX1       | KQLRSEHPDAPV                                         | DELEKHAKEKVV    | GEQKSRAFYRIQATRKMVGAGNLSK  | KISER           | AQSDLSVKA   | EQLKQ                    |
| C.briggsae_NCX1      | KQLRSEHPDAPV                                         | DELEKHAKEKVV    | GEQKSRAFYRIQATRKMVGAGNLSK  | KISER           | AQSDLSVKA   | EQLKQ                    |
| C.elegans_NCX2       | REIRKQNPHTPT                                         | ELQKQAEYEMIS    | SRGPKSRAFYRVQATRRLIGGGDVK  | KRIDK           | EH.....     | NKALDA.                  |
| T.spiralis           | REIRKQNPHTPT                                         | ELQKQAEYEMIS    | SRGPKSRAFYRVQATRRLIGGGDVK  | KRIDK           | EH.....     | NKALDA.                  |
| M.brevicollis_1      | VLKDVETEALTE                                         | DEIANIAAARKI    | DGTGKVSRAQFRIDANRRLRGAAPL  | PDWQR           | ALLD.....   | TQKSRAI                  |
| I.kriarsnsmtm        | EDKVNLAALAKL                                         | KGERSRAQFRIDATR | KLVSGLLPDYNKAKLQ           | .....           | .....       | EALLR..                  |
| S.kowalevskii_1      | AATIAAIEAEKNS                                        | PH.....         | .....                      | TKAWYRVNATR     | NMTGGQKLI   | PAVDPKLLSAYDQAKMGS       |
| S.kowalevskii_2      | AATIAAIEAEKNS                                        | PH.....         | .....                      | TRAWYRVSE       | TRNMTGGQKLI | PVDPKLLLAYDQVKMGSS       |
| T.adhaerens_1        | AAKLAASKIIDS                                         | EPO.....        | .....                      | SYIYRVGAARL     | VSGSKRVTP   | LLDARLQKIFDDIEMKKNKF     |
| D.pulex_1            | AAKLAASKIIDS                                         | EPO.....        | .....                      | SRAWYRIGATR     | IFSGSKRIQP  | QLSKLREYVDAINEHPDAV      |
| P.humanus_corporis   | AAKLAASKIIDS                                         | EPO.....        | .....                      | SAATYRMSAIR     | DLTGGRKLRP  | RLSLKLOEVYDTINQYPLGS     |
| O.dioica             | AVASKMQGSFC                                          | VVPSFHVTKNLC    | QPTQGRSRAWYRVQATRLLTAGARTE | PN.....         | .....       | KALSRMA                  |
| A.pisum              | AAKLAASKIIDS                                         | STH.....        | .....                      | RGAMWYRIGAVRR   | FTGGQIEP    | VLEDHLRQ.....            |
| P.marinus            | AEVTRRRRLQ                                           | ERCPSQIRQRHGS   | SLTD                       | DAVMRIIQAERPPRT | TRAQHRIQAS  | RMLTTRRSRGASKRSSVWNS     |
| A.anophagefferens_1  | LKQLDPTLEES                                          | ERHDLVKKLAM     | GQAKPS.....                | .....           | RAVLRMNAVR  | ATGQKVIKADGPPDPKV        |
| E.huxleyi            | ARELQRMDDP                                           | AADGTSDAQGLAS   | YLASSLGLT                  | LRRAAYRVAT      | TRGATGVAAP  | QARAAAEQEVAPPPSAV        |
| C.intestinalis       | SVVTKIASIRK                                          | LYSNNNAIQDES    | .....                      | SGN.VAFASSAYS   | TLESAGELT   | IDVLLFHRKRKPKG.....      |
| B.floridae           | EVTVMVSIKAL                                          | TSPAMRRQLAAN    | DMSSGK.F                   | FTGHTYSV        | LESSGAL     | IEVDVLFHRRRLSKL.....     |
| T.adhaerens_3        | SEPKMAHFVNI                                          | IITHRLNEQSNAS   | SRNIAATFV                  | FEIAAYS         | VREDSGS     | IDLIVLLNRHRALIKKSQENKNNK |
| N.vectensis_2        | .....                                                | .....           | .....                      | DDNLNRFV        | FGTSSYSV    | LKSAKHIDLEIILQN.....     |
| consensus>50         | kelkqkhp.e.eql.elanyq.1..q.ksrafyriqatrlmtgagnilk... | ad.....         | .....                      | .....           | .....       | .....                    |

|                      | 400                                                                                                                                           | 410                                                                                               | 420 | 430 | 440 | 450 |
|----------------------|-----------------------------------------------------------------------------------------------------------------------------------------------|---------------------------------------------------------------------------------------------------|-----|-----|-----|-----|
| H.sapiens_NCX1.1     | E V N T E V T E N D P V S K . . . . .                                                                                                         | I F F E Q G T Y Q C L E N C G T V A L T I I R R G G D L . . T N T V F V D F R T E D G T           |     |     |     |     |
| P.troglodytes_NCX1.1 | E V N T E V T E N D P V S K . . . . .                                                                                                         | I F F E Q G T Y Q C L E N C G T V A L T I I R R G G D L . . T N T V F V D F R T E D G T           |     |     |     |     |
| C.familiaris_NCX1.1  | E V N T E V A E N D P V S K . . . . .                                                                                                         | I F F E Q G T Y Q C L E N C G T V A L T I I R R G G D L . . T N T V F V D F R T E D G T           |     |     |     |     |
| F.catus_NCX1.1       | E V N T E V A E N D P V S K . . . . .                                                                                                         | I F F E Q G T Y Q C L E N C G T V A L T I I R R G G D L . . T N T V F V D F R T E D G T           |     |     |     |     |
| C.porcellus_NCX1.1   | E V N T E V A E N D P V S K . . . . .                                                                                                         | I F F E Q G T Y Q C L E N C G T V A L T I I R R G G D L . . T N T V F V D F R T E D G T           |     |     |     |     |
| B.taurus_NCX1.1      | E V N T E V A E N D P V S K . . . . .                                                                                                         | I F F E Q G T Y Q C L E N C G T V A L T I I R R G G D L . . T N T V F V D F R T E D G T           |     |     |     |     |
| R.norvegicus_NCX1.1  | E V N M D V V E N D P V S K . . . . .                                                                                                         | V F F E Q G T Y Q C L E N C G T V A L T I I R R G G D L . . T N T V F V D F R T E D G T           |     |     |     |     |
| M.musculus_NCX1.1    | E V N M E M A E N D P V S K . . . . .                                                                                                         | I F F E Q G T Y Q C L E N C G T V A L T I M R R G G D L . . S T T V F V D F R T E D G T           |     |     |     |     |
| M.mulatta_NCX1.3     | E V N T E V T E N D P V S K . . . . .                                                                                                         | I F F E Q G T Y Q C L E N C G T V A L T I I R R G G D L . . T N T V F V D F R T E D G T           |     |     |     |     |
| O.cuniculus_NCX1.2   | E V N T E M A E N D P V S K . . . . .                                                                                                         | I F F E Q G T Y Q C L E N C G T V A L T I I R R G G D L . . T N T V F V D F R T E D G T           |     |     |     |     |
| S.tropicalis_NCX1    | E V N T D V V E N D P V S K . . . . .                                                                                                         | I Y F E Q A T Y Q C L E N C G T V A L T L V R R G G D L . . T N T V V V D F R T E D G S           |     |     |     |     |
| O.mossambicus_NCX1.1 | D I F S E V S V N D F S S K . . . . .                                                                                                         | V F F D P G T Y Q C L E N C G S V A L N V V R R G G D L . . T S T V V V D Y R T E D G T           |     |     |     |     |
| O.mykiss_NCX1        | E I R S E V S E N D F S S K . . . . .                                                                                                         | V F F D P G T Y Q C L E N C G T V A L N V V R L G G D L . . T N T V S V E Y R T E D G T           |     |     |     |     |
| D.rerio_NCX1a        | E L R S E V S D N D I S S K . . . . .                                                                                                         | I F F D P G T Y Q C L E N C G T V A L N V V R R G G D L . . T S T V S V E Y R T E D G T           |     |     |     |     |
| H.sapiens_NCX3.3     | E V H T D E P E . D F I S K . . . . .                                                                                                         | V F F D P C S Y Q C L E N C G A V L L T V V R K G G D M . . S K T M Y V D Y K T E D G S           |     |     |     |     |
| R.norvegicus_NCX3.3  | E V H T D E P E . D F A S K . . . . .                                                                                                         | V F F D P C S Y Q C L E N C G A V L L T V V R K G G D I . . S K T M Y V D Y K T E D G S           |     |     |     |     |
| M.musculus_NCX3.1    | E V H T D E P E . D F A S K . . . . .                                                                                                         | V F F D P C S Y Q C L E N C G A V L L T V V R K G G D I . . S K T M Y V D Y K T E D G S           |     |     |     |     |
| G.gallus_NCX3        | E V R P D E P E . E F I S K . . . . .                                                                                                         | I Y F D P C S Y Q C L E N C G A V L L T V V R K G G D V . . S K T I Y V D Y K T E D G S           |     |     |     |     |
| D.rerio_NCX4a        | E A N P Q E . E D P H T I Y . . . . .                                                                                                         | L E F E P S H Y Q C F E N C G S L K L S V T R H G G D S . . G C T V K V D Y R T E D G T           |     |     |     |     |
| T.nigroviridis_NCX4a | E A S G Q E . E D P H T I Y . . . . .                                                                                                         | L Q F E P S H Y Q C F E N C G S L K L S V S R Y G G S . . G C T V K V D Y R T E D A T             |     |     |     |     |
| H.sapiens_NCX2.1     | G A G E D . . . . . E D D G A S R . . . . .                                                                                                   | I F F E P S L Y H C L E N C G S V L L S V T C Q G G E G . . N S T F Y V D Y R T E D G S           |     |     |     |     |
| R.norvegicus_NCX2.1  | G A P D D . . . . . E D D G A S R . . . . .                                                                                                   | I F F E P S L Y H C L E N C G S V L L S V A C Q G G E G . . N S T F Y V D Y R T E D G S           |     |     |     |     |
| M.musculus_NCX2.1    | G A P D D . . . . . E D D G A S R . . . . .                                                                                                   | I F F E P S L Y H C L E N C G S V L L S V A C Q G G E G . . N S T F Y V D Y R T E D G S           |     |     |     |     |
| S.kowalevskii_3      | E V K I E V P Q D Q N F T R . . . . .                                                                                                         | V F F E P A E Y T V F E N V G T F N A T V V R R G G D M . . N S T I Y V D Y R S E D G T           |     |     |     |     |
| T.adhaerens_2        | N V D P E D I E K C S L T Q . . . . .                                                                                                         | I Y F S P E K Y T V L E N C G T V G V T V E R T G N . L . . N N V L T V D Y K T Q D G T           |     |     |     |     |
| L.opalescens_NCX     | E I T . . . . . R . . . . .                                                                                                                   | V S F D P G H Y T V M E N V G T F Y G T V T R E G G D L . . T K T L Y V D Y K T E D G T           |     |     |     |     |
| A.mellifera_NCX      | E A E S I E I E N V N A M R . . . . .                                                                                                         | I F F E P G H Y T V M E N V G S F E V G V T R A G G D L . . S K P C T V D Y C T E D G S           |     |     |     |     |
| D.melanogaster_NCX   | D D E . . . . . E A D D P I R . . . . .                                                                                                       | M Y F E P G H Y T V M E N C G E F E V R V V R R G . D I . . S T Y A S V E Y E T Q D G T           |     |     |     |     |
| H.magnipapillata     | E V S A S Q K D T V L E N C . . . . .                                                                                                         | V Q F E P D Q Y T V V E S C G Q C F L T V K R F G N D L . . S D T L Y V D Y E T S D G T           |     |     |     |     |
| C.elegans_NCX1       | Q K T M A T V E F D . . . . .                                                                                                                 | . . . . . P P H Y T C L E N V G D V Y L T V K C D R G S V P E D T T V T V H Y R T I A D T         |     |     |     |     |
| C.briggsae_NCX1      | K Q T M A T V E F D . . . . .                                                                                                                 | . . . . . P P H Y T C L E N V G D V Y L T V K C D R G N V P E D T T V T V H Y R T I A D T         |     |     |     |     |
| C.elegans_NCX2       | . . . . . A Q E K Q S R D N T C K . . . . .                                                                                                   | . . . . . I F L D P A H Y T V L E S V G S F D V V V G R D G G . . P D G L T V M V D Y F T E D G S |     |     |     |     |
| C.briggsae_NCX2      | V Q A Q E K Q L R D N T C K . . . . .                                                                                                         | . . . . . I F L D P A H Y T V L E S V G S F D V V V G R D G G . . P D G L T V M V D Y F T E D G T |     |     |     |     |
| T.spiralis           | M L R R T Q T E T G V R S V . . . . .                                                                                                         | T N V E F A A N A Y A V D P T G E R R V R L K V V R R G S A R K Q L V F N Y R T M S G S           |     |     |     |     |
| M.brevicollis_1      | K D S Y Y A H R A T A L R Q E Q T F G F M T I E Y H V R E D A G A . . . . .                                                                   | . . . . . V T L T I V R T G D L S Q S A S I G I E T Q E G T                                       |     |     |     |     |
| Salpingoeca          | . . . . . D D F F E A H K T K L A K K N F V G L E S L Q Y S I G E G D G H . . . . .                                                           | . . . . . V N V K I L R T G D L S L P L T I E Y Y T E G D T                                       |     |     |     |     |
| S.kowalevskii_1      | V G S T L I S P E . . . . . I P I V E F A A S S C A V Y E N E K R . . . . .                                                                   | . . . . . V R V Y V N R R G N I Q P Q V I F K F E T L D G T                                       |     |     |     |     |
| S.kowalevskii_2      | I G S T L F . P E . . . . . I P I V E F A A A S C A V Y E H E K R . . . . .                                                                   | . . . . . V R V W I N R K G N I H P Q I V I F K F E T L D G T                                     |     |     |     |     |
| T.adhaerens_1        | S S T A D V R D D P E T T T R T T I E F T T A C A V M E N E K M . . . . .                                                                     | . . . . . V K V G I S R T G K L N N T I K V R Y E T L P G T                                       |     |     |     |     |
| D.pulex_1            | N L S P L I E T V P Q N K A I . . . . . I E F H A I A C A V P E S V G R . . . . .                                                             | . . . . . F P I T I V R S G K T D N S V S V R V E T I D G S                                       |     |     |     |     |
| P.humanus_corporis   | A L S L L P E I S M K N A I V . . . . . E F H S A T C A V R E N I G S . . . . .                                                               | . . . . . F F I T V C R H G N L E P S V K V R V E S V D G S                                       |     |     |     |     |
| O.dioica             | R S F S N L P N K N T S D Y A M F N F A C T S S V M E N A K Q . . . . .                                                                       | . . . . . I E L K V M R T G N I M P A T C S Y E T I D G T                                         |     |     |     |     |
| A.pisum              | . . . . . P P T L S Q N D E T K Y A I I E F H A P T I A V N E N I G R . . . . .                                                               | . . . . . F P V I I W R H G N L N T K A T V R V D S I N G T                                       |     |     |     |     |
| P.marinus            | L P A H L V A L K D T V E A D E A V R S E S T I P V I N F K C S R F A V M E G A G R I V L P L V T S R P L E R D V V R Y E T L Q G T A T       |                                                                                                   |     |     |     |     |
| A.anophagefferens_1  | L K A Y L E G A A G P K P H R P E D V V A F F S D V N G K I N T K Y A L L E S D K A V T L H V M R S P A E G P M T I K W A T R D G T A K G S E |                                                                                                   |     |     |     |     |
| E.huxleyi            | L S F A V S G A A F S E G A K E . . . . .                                                                                                     | . . . . . A S L V V E R S G E E L A R E L D W E G S V E Y E S R D G T                             |     |     |     |     |
| C.intestinalis       | . . . . . Q T V I P T T N A N G K F D T Q I M P G V I . . . . .                                                                               | . . . . . S V D Y E T R E G T                                                                     |     |     |     |     |
| B.floridae           | . . . . . T L L N S M S K L N L V N K S N N G P N N G P V V N G T T T D S G Q S S A P S K Q D E A K E D V S V E F F E T R D G T               |                                                                                                   |     |     |     |     |
| T.adhaerens_3        | T V T F G L G K S T S E T I I K S L S S S F K T D K S I K S C D P I T E E S I Q D L E S S R Y S D E E G D D A T Q N N F S V D F E T R D G G   |                                                                                                   |     |     |     |     |
| N.vectensis_2        | . . . . . N N N N K N K E M I Y A H N D S I A D T I S E N S F E D G V T P S S P G S S Q R F S V D Y E T H D G S                               |                                                                                                   |     |     |     |     |
| consensus>50         | e . . . . . e n d . . . . .                                                                                                                   | i f f e . . . . . y . c l e n c g . . . . . l . v v r . g g d . . . . . t v . v d y . t e d g t   |     |     |     |     |

|                      | 460        | 470     | 480          | 490            | 500            | 510                   |
|----------------------|------------|---------|--------------|----------------|----------------|-----------------------|
| H.sapiens_NCX1.1     | ANAGSDYEF  | TEGTV   | VFKPGDTQKEI  | RVGI           | IIDDDIFEEDEN   | NFLVHLSNVKVSSEASED    |
| P.troglodytes_NCX1.1 | ANAGSDYEF  | TEGTV   | VFKPGETQKEI  | RVGI           | IIDDDIFEEDEN   | NFLVHLSNVKVSSEASED    |
| C.familiaris_NCX1.1  | ANAGSDYEF  | TEGTV   | VFKPGETQKEI  | RVGI           | IIDDDIFEEDEN   | NFLVHLSNVKVSSEASED    |
| F.catus_NCX1.1       | ANAGSDYEF  | TEGTV   | VFKPGETQKEI  | RVGI           | IIDDDIFEEDEN   | NFLVHLSNVKVSSEASED    |
| C.porcullus_NCX1.1   | ANAGSDYEF  | TEGTV   | VFKPGETQKEI  | RVGI           | IIDDDIFEEDEN   | NFLVHLSNVKVSSEASED    |
| B.taurus_NCX1.1      | ANAGSDYEF  | TEGTV   | VFKPGETQKEI  | RVGI           | IIDDDIFEEDEN   | NFLVHLSNVKVSLEASED    |
| R.norvegicus_NCX1.1  | ANAGSDYEF  | TEGTV   | IFKPGETQKEI  | RVGI           | IIDDDIFEEDEN   | NFLVHLSNVRSSEVSED     |
| M.musculus_NCX1.1    | ANASDYEFT  | TEGTV   | IFKPGETQKEI  | RVGI           | IIDDDIFEEDEN   | NFLVHLSNVRSDDVSED     |
| M.mulatta_NCX1.3     | ANAGSDYEF  | TEGTV   | VFKPGETQKEI  | RVGI           | IIDDDIFEEDEN   | NFLVHLSNVKVSSEASED    |
| O.cuniculus_NCX1.2   | ANAGSDYEF  | TEGTV   | VFKPGETQKEI  | RVGI           | IIDDDIFEEDEN   | NFLVHLSNVKVSSEASED    |
| S.stropicalis_NCX1   | ANAGSDYEF  | TEGTV   | IFKPGETQKEI  | RVGI           | IIDDDIFEEDEN   | NFLVHLSNVRVNAENTAN    |
| O.mossambicus_NCX1.1 | ANASDYEFT  | TEGTV   | VFKPGETEKEI  | RVGI           | IIDDDIFEEDEN   | NFLVHLSNVRVRAEGNSHE   |
| O.mykiss_NCX1        | ANAGSDYQF  | TEGTV   | VFNPGETEKEI  | RVGI           | IIDDDIFEEDEN   | NFLVHLSNVKVISEGTGYVQ  |
| D.rerio_NCX1a        | ANAGSDYQF  | TEGTV   | IFKPGETEKEI  | RVGI           | IIDDDIFEEDEN   | NFLVHLSNVKVISEGANNGNP |
| H.sapiens_NCX3.3     | ANAGADYEF  | TEGTV   | VFKPGETQKEI  | RVGI           | IIDDDIFEEDEN   | NFLVHLSNVRIIEEQPEEGM  |
| R.norvegicus_NCX3.3  | ANAGADYEF  | TEGTV   | VFKPGETQKEI  | RVGI           | IIDDDIFEEDEN   | NFLVHLSNVRIIEEQPEEGM  |
| M.musculus_NCX3.1    | ANAGADYEF  | TEGTV   | VFKPGETQKEI  | RVGI           | IIDDDIFEEDEN   | NFLVHLSNVRIIEEQPEEGM  |
| G.gallus_NCX3        | ANAGADYEF  | TEGTV   | VFKPGETQKEI  | RVGI           | IIDDDIFEEDEN   | NFLVHLSNVRIIEEQPEEGM  |
| D.rerio_NCX4a        | ANAGSDYEF  | TEGTV   | VFKPGETQKEI  | RVGI           | IIDDDIFEEDEN   | NFLVHLSNVRIIEEQPEEGM  |
| T.nigroviridis_NCX4a | ASAGSDYEF  | TEGTV   | VFKPGETQKEI  | RVGI           | IIDDDIFEEDEN   | NFLVHLSNVRIIEEQPEEGM  |
| H.sapiens_NCX2.1     | AKAGSDYEF  | TEGTV   | VFKPGETQKEI  | RVGI           | IIDDDIFEEDEN   | NFLVHLSNVRIIEEQPEEGM  |
| R.norvegicus_NCX2.1  | AKAGSDYEF  | TEGTV   | VFKPGETQKEI  | RVGI           | IIDDDIFEEDEN   | NFLVHLSNVRIIEEQPEEGM  |
| M.musculus_NCX2.1    | AKAGSDYEF  | TEGTV   | VFKPGETQKEI  | RVGI           | IIDDDIFEEDEN   | NFLVHLSNVRIIEEQPEEGM  |
| H.sapiens_NCX2.1     | AKAGSDYEF  | TEGTV   | VFKPGETQKEI  | RVGI           | IIDDDIFEEDEN   | NFLVHLSNVRIIEEQPEEGM  |
| S.kowalevskii_3      | ANAGSDYEF  | TEGTV   | VFKPGETQKEI  | RVGI           | IIDDDIFEEDEN   | NFLVHLSNVRIIEEQPEEGM  |
| T.adhaerens_2        | ANAGSDYEF  | TEGTV   | VFKPGETQKEI  | RVGI           | IIDDDIFEEDEN   | NFLVHLSNVRIIEEQPEEGM  |
| L.opalescens_NCX     | ANAGSDYEF  | TEGTV   | VFKPGETQKEI  | RVGI           | IIDDDIFEEDEN   | NFLVHLSNVRIIEEQPEEGM  |
| A.mellifera_NCX      | AEAGSDYEF  | TEGTV   | VFKPGETQKEI  | RVGI           | IIDDDIFEEDEN   | NFLVHLSNVRIIEEQPEEGM  |
| D.melanogaster_NCX   | ASAGTDFVGR | KGLLS   | FPPGVDEQRF   | RIE            | VIDDDVFEEDEN   | CFYIRLFPNSEG          |
| H.magnipapillata     | ANEGDDYLPV | KGTLE   | VFKPNETTKI   | IT             | IIDDDIFEEDEN   | NFLVHLSNVRIIEEQPEEGM  |
| C.elegans_NCX1       | AQAESDFVHT | TEGTV   | IFEPGQTEQK   | IKV            | IVDNDIYEDDE    | QFMVRLSQVRAFRSEH      |
| C.briggsae_NCX1      | AQENSDFMPE | TEGTV   | IFEPGQTEQK   | IKV            | IVDNDIYEDDE    | QFMVRLSQVRAFRSEH      |
| C.elegans_NCX2       | ANAGSDYIPV | KGTLE   | VFKPNETTKI   | IT             | IIDDDIFEEDEN   | NFLVHLSNVRIIEEQPEEGM  |
| C.briggsae_NCX2      | ANAGSDYIPV | KGTLE   | VFKPNETTKI   | IT             | IIDDDIFEEDEN   | NFLVHLSNVRIIEEQPEEGM  |
| T.spiralis           | AVQDVHFLK  | SETV    | VFAQEREKTI   | RIE            | VCNPAQWRPGIT   | FVWKLELIPGDKDRIT      |
| M.brevicollis_1      | AKAGSDYVAL | DRRVE   | FAGQAEARV    | IE             | IVDDDEPEDDE    | FFLARKLQPOP           |
| Salpingoeca          | ATMGVDFEET | KGVAE   | FSAGEEEKV    | IP             | IKIIDDDIFEEDEN | NFLVHLSNVRIIEEQPEEGM  |
| S.kowalevskii_1      | AEAGSDYIAQ | RDIM    | VFGSNETQKF   | ID             | IIDDDIFEEDEN   | NFLVHLSNVRIIEEQPEEGM  |
| S.kowalevskii_2      | AEAGSDYIAQ | RDIM    | VFGSNETQKF   | ID             | IIDDDIFEEDEN   | NFLVHLSNVRIIEEQPEEGM  |
| T.adhaerens_1        | AEPEKDYIPQ | NDVL    | VFEPENEKI    | KYVT           | IP             | IVDDNEWEPDEN          |
| D.pulex_1            | AVGGQDFVTF | NQVI    | QFEAGELEK    | IVT            | ME             | IIDDDIFEEDEN          |
| P.humanus_corporis   | AKAGDDYVKV | DEIL    | VFEPEETEKL   | LVK            | IVDD           | TQWEPNEE              |
| O.dioica             | ATKGEDYVEA | KGVLE   | FRKETEQKS    | IT             | VE             | IIDDDIFEEDEN          |
| A.pisum              | AKEGEDFVKV | KEIVE   | FKENEKEKI    | YI             | IE             | ILDDNKWEPDE           |
| P.marinus            | AGEDYVPVID | GKIT    | IRAGESSDEV   | TA             | IMDDDI         | VEEDEN                |
| A.anophagefferens_1  | VGGTGDYETC | SGELT   | FADKENFKT    | IV             | KV             | FDNEDTEDDE            |
| E.huxleyi            | AHAGQDYTA  | VSGRL   | CFARGQSAVLA  | V              | PL             | LDDEVAAEEDT           |
| C.intestinalis       | AKINKDFKYT | SGTL    | IFPETDYVQS   | IS             | PI             | INDQYYPDT             |
| B.floridiae          | GKTKDYYHT  | QGRLL   | VFKETEYRKK   | IK             | IP             | INDQYQSKDFYV          |
| T.adhaerens_3        | AKQGVNFKYS | AGRLN   | FTKSEYQKT    | IT             | V              | DLNDGQYHPNLS          |
| N.vectensis_2        | AKNGKEYQT  | VKGT    | MAFRAGINKHIL | RL             | PL             | LPCEDFSKNKD           |
| consensus>50         | anagsdyef  | .egt.vf | kpgdtqkei    | .v.iidddifeede | .fyv.lsnv      | .v                    |

|                      | 520         | 530      | 540        | 550         | 560                            |
|----------------------|-------------|----------|------------|-------------|--------------------------------|
| H.sapiens_NCX1.1     | NHVS...TLAC | LGSFST   | ATVTIF     | DDDHAGIF    | TFEEPVTHV                      |
| P.troglodytes_NCX1.1 | NHVS...TLAC | LGSFST   | ATVTIF     | DDDHAGIF    | TFEEPVTHV                      |
| C.familiaris_NCX1.1  | NHVS...ALAC | LGSFST   | ATVTIF     | DDDHAGIF    | TFEEPVTHV                      |
| F.catus_NCX1.1       | NHVS...TLAC | LGSFST   | ATVTIF     | DDDHAGIF    | TFEEPVTHV                      |
| C.porcellus_NCX1.1   | NHIS...TLAC | LGSFST   | ATVTIF     | DDDHAGIF    | TFEEPVTHV                      |
| B.taurus_NCX1.1      | SHVS...TLAC | LGSFST   | ATVTIF     | DDDHAGIF    | TFEEPVTHV                      |
| R.norvegicus_NCX1.1  | NHVS...AIA  | LGSFNT   | ATITIF     | DDDHAGIF    | TFEEPVTHV                      |
| M.musculus_NCX1.1    | NHAS...SIA  | LGSFST   | ATITIF     | DDDHAGIF    | TFEEPVTHV                      |
| M.mulatta_NCX1.3     | NHVS...TLAC | LGSFST   | ATVTIF     | DDDHAGIF    | TFEEPVTHV                      |
| O.cuniculus_NCX1.2   | NHIS...TLAC | LGSFST   | ATVTIF     | DDDHAGIF    | TFEEPVTHV                      |
| S.tropicalis_NCX1    | NHVT...PLAC | LGSFST   | ATVTIF     | DDDHAGIF    | TFEEPVTHV                      |
| O.mossambicus_NCX1.1 | NHVD...TLA  | LGLPCT   | ATVTIF     | DDDHAGIF    | TFEEPVMTV                      |
| O.mykiss_NCX1        | NHLD...TLA  | LGLPCS   | ATVTIF     | DDDHAGIF    | TFEEPVMTI                      |
| D.rerio_NCX1a        | NHVD...ALA  | LGLPST   | ATVTIF     | DDDHAGIF    | TFEEPIVHI                      |
| H.sapiens_NCX3.3     | IFNSLPLPRA  | VLASPC   | CVATVTIL   | DDDHAGIF    | TFECDTIHV                      |
| R.norvegicus_NCX3.3  | ILNSLPLPRA  | VLASPC   | CVATVTIL   | DDDHAGIF    | TFECDTIHV                      |
| M.musculus_NCX3.1    | ILNSLPLPRA  | VLASPC   | CVATVTIL   | DDDHAGIF    | TFECDTIHV                      |
| G.gallus_NCX3        | ELGNSPYPKA  | ILASPC   | CVATVTIL   | DDDHAGIF    | TFECDVIHV                      |
| D.rerio_NCX4a        | IGSSHVPPKA  | ALGNAHS  | ATVTIY     | DDDHAGIF    | TFESNSTRV                      |
| T.nigroviridis_NCX4a | .....PPEA   | ALGKAHT  | ATVTIY     | DDDHAGIF    | TFESDSTKV                      |
| H.sapiens_NCX2.1     | .....PKGR   | LVAPLL   | ATVTIL     | DDDHAGIF    | SFQDRLLHV                      |
| R.norvegicus_NCX2.1  | .....PKGR   | LVAPLL   | ATVTIL     | DDDHAGIF    | SFQDRLLHV                      |
| M.musculus_NCX2.1    | .....PKGR   | LVAPLL   | ATVTIL     | DDDHAGIF    | SFQDRLLHV                      |
| S.kowalevskii_3      | .....PQAR   | LVEPAF   | ATVTIY     | DDDHAGIF    | TFEEKLVKV                      |
| T.adhaerens_2        | .....KCVI   | ESFST    | ATVTIL     | DDDHAGIF    | TFESKYSV                       |
| L.opalescens_NCX     | .....AKAQ   | LANPFL   | ATVTIM     | DDDHAGIF    | TFIDEKEMSV                     |
| A.mellifera_NCX      | .....AMLV   | SPSL     | ATVTIM     | DDDHAGIF    | TFEPERDMEL                     |
| D.melanogaster_NCX   | .....VKLAV  | PMIAT    | ATVTIM     | DDDHAGIF    | TFEFTDSVFEI                    |
| H.magnipapillata     | .....TKTI   | TIGKAN   | ATITII     | DDDHAGIF    | TFEHSNFEV                      |
| C.elegans_NCX1       | .....LAA    | .....TAT | VIIV       | DDDHAGIF    | TFGLSEKFKC                     |
| C.briggsae_NCX1      | .....PAA    | .....TAT | VIIV       | DDDHAGIF    | TFGLSEKFKC                     |
| C.elegans_NCX2       | .....GLPVA  | QLEM     | NTATIM     | DDDHAGIF    | TFGFHDHFQV                     |
| C.briggsae_NCX2      | .....GLPVA  | QLEM     | NTATIM     | DDDHAGIF    | TFGFHDHFQV                     |
| T.spiralis           | AAVGESVEFA  | .....IS  | DLRVGENE   | GFARIPISR   | .....RASLST                    |
| M.brevicollis_1      | .....NYRL   | IPAREL   | AKIIV      | DDDHAGIF    | TFEFQTRMEVE                    |
| Salpingoeca          | .....QYLL   | IVPGRNR  | ARITII     | DDDHAGIF    | TFVLSLKFSC                     |
| S.kowalevskii_1      | .....LGK    | KNTMQIT  | IINDE      | EPGTFE      | FTMPSYLVK                      |
| S.kowalevskii_2      | .....LGK    | KHI MQIT | IINDE      | EPGTFE      | FTMPSYLVK                      |
| T.adhaerens_1        | .....DAI    | IGEKNSTE | ITII       | DDDHAGIF    | TFEFNKASYL                     |
| D.pulex_1            | .....KDV    | M LGRIS  | IMEVTI     | DDDHAGIF    | TFEFEEGILVK                    |
| P.humanus_corporis   | .....VQI    | GRISIME  | ITII       | DDDHAGIF    | TFEFKGTGILVK                   |
| O.dioica             | .....PRCK   | LGRSIN   | QVTII      | DDDHAGIF    | TFEFKPAFMCK                    |
| A.pisum              | .....LSVK   | LGCISIM  | EVTTI      | DDDHAGIF    | TFEFKGRGLLVK                   |
| P.marinus            | .....GKL    | SVAEVTI  | DDDHAGIF   | TFEDELV     | VEGDVSPSPWPVDPSEARLWQEAQVTVLRT |
| A.anophagefferens_1  | .....AF     | .....GDA | STCEVTI    | DDDHAGIF    | TFEFPKKEGAE                    |
| E.huxleyi            | .....GRR    | STMAVTI  | DDDHAGIF   | TFEFAVAETRV | .....ESQRVAVLEVERK             |
| C.intestinalis       | .....DAT    | LGDPSV   | SRVTII     | DDDHAGIF    | TFELETSQLYADME                 |
| B.floridae           | .....DAAL   | GDPSV    | ARVTII     | DDDHAGIF    | TFEFPPIYGD                     |
| T.adhaerens_3        | .....YSK    | LADPSV   | ALVTI      | DDDHAGIF    | TFEFKAKYHV                     |
| N.vectensis_2        | .....ID     | LGEPNL   | TRITII     | DDDHAGIF    | TFEFASYHANFV                   |
| consensus>50         | .....a.lg.p | ..atvt!  | ..#ddhagif | ..fee       | .....v.....esig.mev.vlr        |

|                      | 570                   | 580      | 590                     | 600             | 610     | 620       |           |       |           |          |        |        |
|----------------------|-----------------------|----------|-------------------------|-----------------|---------|-----------|-----------|-------|-----------|----------|--------|--------|
| H.sapiens_NCX1.1     | SGARGN                | VIVPYK   | TIEGTARGG               | GE              | DFEDTC  | GELEFQND  | IVKTI     | ISVK  | VIDDEEYK  | KTFF     | LE     |        |
| P.troglodytes_NCX1.1 | SGARGN                | VIVPYK   | TIEGTARGG               | GE              | DFEDTC  | GELEFQND  | IVKTI     | ISVK  | VIDDEEYK  | KTFF     | LE     |        |
| C.familiaris_NCX1.1  | SGARGN                | VIVPYK   | TIEGTARGG               | GE              | DFEDTC  | GELEFQND  | IVKTI     | ISVK  | VIDDEEYK  | KTFF     | LE     |        |
| F.catus_NCX1.1       | SGARGN                | VIVPYK   | TIEGTARGG               | GE              | DFEDTC  | GELEFQND  | IVKTI     | ISVK  | VIDDEEYK  | KTFF     | LE     |        |
| C.porcullus_NCX1.1   | SGARGN                | VIVPYK   | TIEGTARGG               | GE              | DFEDTC  | GELEFQND  | IVKTI     | ISVK  | VIDDEEYK  | KTFF     | LE     |        |
| B.taurus_NCX1.1      | SGARGN                | VIVPYK   | TIEGTARGG               | GE              | DFEDTC  | GELEFQND  | IVKTI     | ISVK  | VIDDEEYK  | KTFF     | LE     |        |
| R.norvegicus_NCX1.1  | SGARGN                | VIVPYK   | TIEGTARGG               | GE              | DFEDTC  | GELEFQND  | IVKTI     | ISVK  | VIDDEEYK  | KTFF     | LE     |        |
| M.musculus_NCX1.1    | SGARGN                | VIVPYK   | TIEGTARGG               | GE              | DFEDTC  | GELEFQND  | IVKTI     | ISVK  | VIDDEEYK  | KTFF     | LE     |        |
| M.mulatta_NCX1.3     | SGARGN                | VIVPYK   | TIEGTARGG               | GE              | DFEDTC  | GELEFQND  | IVKTI     | ISVK  | VIDDEEYK  | KTFF     | LE     |        |
| O.cuniculus_NCX1.2   | SGARGN                | VIVPYK   | TIEGTARGG               | GE              | DFEDTC  | GELEFQND  | IVKTI     | ISVK  | VIDDEEYK  | KTFF     | LE     |        |
| S.tropicalis_NCX1    | SGARGN                | VIVPYK   | TIEGTARGG               | GE              | DFEDTC  | GELEFQND  | IVKTI     | ISVK  | VIDDEEYK  | KTFF     | LE     |        |
| O.mossambicus_NCX1.1 | SGARGV                | VIVPYK   | TIEGTARGG               | GE              | DFEDTC  | GELEFQND  | IVKTI     | ISVK  | VIDDEEYK  | KTFF     | LE     |        |
| O.mykiss_NCX1        | SGARGL                | VIVPYK   | TIEGTARGG               | GE              | DFEDTC  | GELEFQND  | IVKTI     | ISVK  | VIDDEEYK  | KTFF     | LE     |        |
| D.rerio_NCX1a        | SGARGV                | VIVPYK   | TIEGTARGG               | GE              | DFEDTC  | GELEFQND  | IVKTI     | ISVK  | VIDDEEYK  | KTFF     | LE     |        |
| H.sapiens_NCX3.3     | SGARGT                | VIVPFR   | TVEGTAKGG               | GE              | DFEDTY  | GELEFKNDE | TVKTI     | IRVK  | VIDDEEYK  | QENFF    | IA     |        |
| R.norvegicus_NCX3.3  | SGARGT                | VIVPFR   | TVEGTAKGG               | GE              | DFEDTY  | GELEFKNDE | TVKTI     | IRVK  | VIDDEEYK  | QENFF    | IA     |        |
| M.musculus_NCX3.1    | SGARGT                | VIVPFR   | TVEGTAKGG               | GE              | DFEDTY  | GELEFKNDE | TVKTI     | IRVK  | VIDDEEYK  | QENFF    | IA     |        |
| G.gallus_NCX3        | SGARGT                | VIVPFR   | TVEGTAKGG               | GE              | DFEDTY  | GELEFKNDE | TVKTI     | IRVK  | VIDDEEYK  | QENFF    | IA     |        |
| D.rerio_NCX4a        | SGARGK                | VAVPYH   | TVEGTAKAG               | GE              | DFEDVA  | GKLEFLNDE | TMKIL     | LEVK  | VIDDEEYK  | KTFF     | TIH    |        |
| T.nigroviridis_NCX4a | SGARGK                | VAVPYH   | TVEGTAKAG               | GE              | DFEDVA  | GKLEFLNDE | TMKIL     | LEVK  | VIDDEEYK  | KTFF     | TIH    |        |
| H.sapiens_NCX2.1     | SGARGT                | VRLPYR   | TVDGTARGG               | GE              | DFEDAC  | GELEFGDDE | TMKTL     | LQVK  | VIDDEEYK  | KNFF     | IE     |        |
| R.norvegicus_NCX2.1  | SGARGT                | VRLPYR   | TVDGTARGG               | GE              | DFEDAC  | GELEFGDDE | TMKTL     | LQVK  | VIDDEEYK  | KNFF     | IE     |        |
| M.musculus_NCX2.1    | SGARGT                | VRLPYR   | TVDGTARGG               | GE              | DFEDAC  | GELEFGDDE | TMKTL     | LQVK  | VIDDEEYK  | KNFF     | IE     |        |
| S.kowalevskii_3      | SGARGT                | VIVPYH   | TIEGTAKGH               | GE              | DFEDAD  | GELEFHND  | TSKFI     | INVK  | VIDDEEYK  | KNFF     | VE     |        |
| T.adhaerens_2        | SGARGT                | IRVPYH   | TKEGTAKGG               | GE              | DFEDAV  | GELEFKNDE | TSKTI     | IEVH  | VIDDEEYK  | NEIF     | VVL    |        |
| L.opalescens_NCX     | SGARGC                | VKVPFH   | SVDTATYGG               | GE              | DFEDLV  | KDVI      | FDNDE     | TEKFL | RVR       | VVDDEEYK | NETFF  | IW     |
| A.mellifera_NCX      | SGARGR                | VVVPYR   | TIEGTAKPG               | GE              | DFEDTY  | GELEFKNDE | TVKTI     | IRVK  | VIDDEEYK  | QENFF    | IA     |        |
| D.melanogaster_NCX   | SGARGT                | VIVPYW   | TENDTATES               | GE              | DFEDTY  | GELEFKNDE | TVKTI     | IRVK  | VIDDEEYK  | QENFF    | IA     |        |
| H.magnipapillata     | IGARGK                | VSIPIYQ  | TVEGSALGG               | GE              | DFEDSK  | GELEFFDDE | TIKTV     | DIPI  | VNREEYK   | TKFT     | TVI    |        |
| C.elegans_NCX1       | RGARGK                | VSIPIYQ  | TVEGSALGG               | GE              | DFEDSK  | GELEFFDDE | TIKTV     | DIPI  | VNREEYK   | TKFT     | TVI    |        |
| C.briggsae_NCX1      | RGARGK                | VSIPIYQ  | TVEGSALGG               | GE              | DFEDSK  | GELEFFDDE | TIKTV     | DIPI  | VNREEYK   | TKFT     | TVI    |        |
| C.elegans_NCX2       | SGARGK                | VIIIPFR  | TVEGTASAD               | GE              | DFEMKE  | GEIVFEDNQ | TEALV     | EIG   | VDTEQYERS | DYFY     | IE     |        |
| C.briggsae_NCX2      | SGARGK                | VIIIPFR  | TVEGTASAD               | GE              | DFEMKE  | GEIVFEDNQ | TEALV     | EIG   | VDTEQYERS | DYFY     | IE     |        |
| T.spiralis           | TTMFS                 | SASVEWK  | TENGTAQGG               | GE              | DFVGEK  | GELILEPGV | VEAYI     | DIPI  | VNDYEPKDE | FTVK     |        |        |
| M.brevicollis_1      | NGTKG                 | AVACRY   | FMRNGSALD               | GE              | DFVGEK  | GELILEPGV | VEAYI     | DIPI  | VNDYEPKDE | FTVK     |        |        |
| Salpingoeca          | NGSKG                 | ELKVN    | YATQDGTAAHAP            | GE              | DFEETK  | GTLVFEDGE | TEKVI     | IAIN  | VIDDEEYK  | DEHF     | FL     |        |
| S.kowalevskii_1      | NGTDG                 | KVVLKWK  | TTDMTASISG              | GE              | DFEGGE  | GELVFEHGE | KQKSI     | IDIP  | IVDDQYEEK | DES      | FKL    |        |
| S.kowalevskii_2      | NGTDG                 | KVVLKWK  | TTDMTASISG              | GE              | DFEGGE  | GELVFEHGE | KQKSI     | IDIP  | IVDDQYEEK | DES      | FKL    |        |
| T.adhaerens_1        | NGSDG                 | TISVNWK  | TIDGSAING               | GE              | DFRGGT  | GKIEFQHG  | EMSKL     | IEIP  | LDDDI     | FEN      | DETF   | HI     |
| D.pulex_1            | YGADG                 | EVSVRWR  | TIDKNVSG                | GE              | DFYIGE  | GCLVFKHSE | MKRV      | IEIP  | ISNDMMPEK | DECF     | EV     |        |
| P.humanus_corporis   | YGADG                 | EVSVRWR  | TIDKNVSG                | GE              | DFYIGE  | GCLVFKHSE | MKRV      | IEIP  | ISNDMMPEK | DECF     | EV     |        |
| O.dioica             | NGADG                 | QVSVWR   | VTPITAOHG               | GE              | DFYIGE  | GCLVFKHSE | MKRV      | IEIP  | ISNDMMPEK | DECF     | EV     |        |
| A.pisum              | HGSDG                 | EVSVRWR  | TIDGSAING               | GE              | DFYIGE  | GCLVFKHSE | MKRV      | IEIP  | ISNDMMPEK | DECF     | EV     |        |
| P.marinus            | KGCSG                 | EVRVLYR  | TESGNVAVP               | GE              | DFYIHT  | G...ELIM  | HNQAAG    | VIKI  | PLRSTSTR  | TPH      | FRL    |        |
| A.anophagefferens_1  | NGSAG                 | QVQCDY   | ELVDGTACCG              | GE              | DFGGTV  | FPEREGT   | FVFENT    | EVKFI | EIPVIN    | TNRY     | EGES   |        |
| E.huxleyi            | RGVQG                 | AVSVGWR  | TADGTALAS               | GE              | DFVPPGR | GRLTFAPGV | TRAAIE    | VEI   | IDDGAY    | LAD      | ESFAV  |        |
| C.intestinalis       | CGSDG                 | VVVFVHY  | ATIDGTAAHGG             | GE              | DFVPPGR | GRLTFAPGV | TRAAIE    | VEI   | IDDGAY    | LAD      | ESFAV  |        |
| B.floridiae          | NGTDG                 | NTSVEYT  | TMDGTAKGG               | GE              | DFSSPT  | LDYISNS   | GVLYFAHGE | TSKQI | SIN       | LNK      | EKMGRH | FVILLR |
| T.adhaerens_3        | KGVDG                 | TVHLEFA  | TIDGTAAHGG              | GE              | DFSSPT  | LDYISNS   | GVLYFAHGE | TSKQI | SIN       | LNK      | EKMGRH | FVILLR |
| N.vectensis_2        | KGCDG                 | TTLKYH   | TMDGTAKGG               | GE              | DFSSPT  | LDYISNS   | GVLYFAHGE | TSKQI | SIN       | LNK      | EKMGRH | FVILLR |
| consensus>50         | sgarg.vivpy.tiegtA.gg | .....g.d | %ed..gelefqnde..k.i.i.i | iddeeyekn..ff.. |         |           |           |       |           |          |        |        |



|                      | 660                                     | 670   | 680    | 690     | 700      | 710       | 720        |                     |
|----------------------|-----------------------------------------|-------|--------|---------|----------|-----------|------------|---------------------|
| H.sapiens_NCX1.1     | GQPVFRKVVHAREHPILSTVITIADEYDDKQPLTSKEE  | ERR   | IAEMGR | FI      | LGEHTKL  | EVII      | ESYEFKSTV  |                     |
| P.troglodytes_NCX1.1 | GQPVFRKVVHAREHPILSTVITIADEYDDKQPLTSKEE  | ERR   | IAEMGR | FI      | LGEHTKL  | EVII      | ESYEFKSTV  |                     |
| C.familiaris_NCX1.1  | GQPVFRKVVHAREHPIPSTVITIAEEYDDKQPLTSKEE  | ERR   | IAEMGR | FI      | LGEHTKL  | EVII      | ESYEFKSTV  |                     |
| F.catus_NCX1.1       | GQPVFRKVVHAREHPIPSTVITIAEEYDDKQPLTSKEE  | ERR   | IAEMGR | FI      | LGEHTKL  | EVII      | ESYEFKSTV  |                     |
| C.porcullus_NCX1.1   | GQPVLRKVVHARDHPIIPSTVITIADEYDDKQPLTSKEE | ERR   | IAELGR | FI      | LGEHTKL  | EVII      | ESYEFKSTV  |                     |
| B.taurus_NCX1.1      | GQPVFRKVVHAREHPLPSTIITIADEYDDKQPLTSKEE  | ERR   | IAEMGR | FI      | LGEHTKL  | EVII      | ESYEFKSTV  |                     |
| R.norvegicus_NCX1.1  | GQPVFRKVVHARDHPIIPSTVISISEEYDDKQPLTSKEE | ERR   | IAEMGR | FI      | LGEHTKL  | EVII      | ESYEFKSTV  |                     |
| M.musculus_NCX1.1    | GQPIFRKVVHARDHPIIPSTVITISEEYDDKQPLTSKEE | ERR   | IAEMGR | FI      | LGEHTKL  | EVII      | QESYEFKSTV |                     |
| M.mulatta_NCX1.3     | .....DEYDDKQPLTSKEE                     | ERR   | IAEMGR | FI      | LGEHTKL  | EVII      | ESYEFKSTV  |                     |
| O.cuniculus_NCX1.2   | .....EEYDDKQPLTSKEE                     | ERR   | IAEMGR | FI      | LGEHTKL  | EVII      | ESYEFKSTV  |                     |
| S.tropicalis_NCX1    | GKPVLRKVVQRDHPPIIPSTVILTEENEEKQPLTSKEE  | ERR   | IAEMGR | FI      | LGEHTKL  | EVII      | ESYEFKSTV  |                     |
| O.mossambicus_NCX1.1 | GRDIYRKVQGREHPVPSNIISIA.EDGAEELTKKEE    | ERR   | IAEMGR | FI      | LGEHVKL  | EVII      | ESYEFKSTV  |                     |
| O.mykiss_NCX1        | GRDVYRKVQGRDNPVPATIIISLA.EEGDEEALSKKEE  | ERR   | IAEMGR | FI      | LGEHVKL  | EVII      | ESYEFKSTV  |                     |
| D.rerio_NCX1a        | GRDVYRKVQGRDKPIIPSTIISIS.EDGEETLTKKEE   | ERR   | IAEMGR | FI      | LGEHVKL  | EVII      | ESYEFKSTV  |                     |
| H.sapiens_NCX3.3     | .....LTMEEE                             | EAKR  | IAEMGR | FI      | LGEHPKL  | EVII      | ESYEFKSTV  |                     |
| R.norvegicus_NCX3.3  | .....LTMEEE                             | EAKR  | IAEMGR | FI      | LGEHPKL  | EVII      | ESYEFKSTV  |                     |
| M.musculus_NCX3.1    | .....LTVEEE                             | EAKR  | IAEMGR | FI      | LGEHPKL  | EVII      | ESYEFKSTV  |                     |
| G.gallus_NCX3        | .....LTVEEE                             | EAKR  | IAEMGR | FI      | LGEHPKL  | EVII      | ESYEFKSTV  |                     |
| D.rerio_NCX4a        | .....DSNDNKPAVGA                        | EEE   | VAKMGC | PS      | LGEHTKL  | EVII      | ESYEFKSTV  |                     |
| T.nigroviridis_NCX4a | .....DTNDNKTSVGP                        | ED.   | VSKMGC | PS      | LGEHTKL  | EVII      | ESYEFKSTV  |                     |
| H.sapiens_NCX2.1     | .....LTAEEE                             | EARR  | IAEMGR | FI      | LGENCRLE | EVII      | ESYDFKNTV  |                     |
| R.norvegicus_NCX2.1  | .....LTAEEE                             | EARR  | IAEMGR | FI      | LGENCRLE | EVII      | ESYDFKNTV  |                     |
| M.musculus_NCX2.1    | .....LTAEQE                             | EARR  | IAEMGR | FI      | LGENCRLE | EVII      | ESYDFKNTV  |                     |
| S.kowalevskii_3      | .....ENSGNHMTE                          | DEKR  | VAEMGR | FI      | LGDILKCE | EIKI      | LESTEFKNTV |                     |
| T.adhaerens_2        | .....DKKRIEKERNHVAKT                    | TGN   | QPIDVN | PS      | LGPYKEA  | EVII      | ESHEFKNTV  |                     |
| L.opalescens_NCX     | .....VL                                 | ..... | AELG   | KPR     | RGENIKIT | VHII      | ESTEFKSVV  |                     |
| A.mellifera_NCX      | .....TAEK                               | MALLG | KPK    | LGEVFRA | QIRIK    | ESKEFKNTV |            |                     |
| D.melanogaster_NCX   | .....QDLT                               | ELDR  | ILLLS  | KFR     | NGELTAY  | VRI       | RESQEFKATI |                     |
| H.magnipapillata     | .....KDD                                | DLRK  | VLEVG  | KPT     | LGDHKAC  | EIKI      | VESKEFRKTI |                     |
| C.elegans_NCX1       | .....                                   | ..... | .....  | .....   | FSRCK    | VVIT      | EDREFKNTV  |                     |
| C.briggsae_NCX1      | .....                                   | ..... | .....  | .....   | .....    | .....     | .....      |                     |
| C.elegans_NCX2       | QTNSPHLTSRFRNRLGWSWIAGMKGNGDDEVTTSLTP   | SQLE  | IAEMGR | FI      | LGEFTKC  | QITR      | ESKEFFQGI  |                     |
| C.briggsae_NCX2      | QSNPSPHLTSRFRNRLGWSWIAGMKGNGDDEVTTALTP  | SQLE  | IAEMGR | FI      | LGEFTKC  | QITR      | ESKEFFQGI  |                     |
| T.spiralis           | .....                                   | ..... | .....  | .....   | GKAS     | LGACQSI   | VVTI       | VNDNISRY            |
| M.brevicollis_1      | .....                                   | ..... | .....  | .....   | GST      | LGKVT     | CRVVI      | LNDDKAQRL           |
| Salpingoeca          | .....                                   | ..... | .....  | .....   | DVT      | FGEVTK    | KITIL      | NDDVTTLA            |
| S.kowalevskii_1      | .....                                   | ..... | .....  | .....   | DGAK     | LGKTR     | TSVIT      | IVNDDIYNSLL         |
| S.kowalevskii_2      | .....                                   | ..... | .....  | .....   | DGAK     | LGKTR     | TSVIT      | IVNDDIYNSLL         |
| T.adhaerens_1        | .....                                   | ..... | .....  | .....   | GGAK     | LGSRT     | TRTALT     | IVNDDVYNSLL         |
| D.pulex_1            | .....                                   | ..... | .....  | .....   | GGAV     | LGSIT     | KLAVT      | ITNDEEFNSVL         |
| P.humanus_corporis   | .....                                   | ..... | .....  | .....   | NDAS     | LGDIK     | VICVT      | ITNDEDFANII         |
| O.dioica             | .....                                   | ..... | .....  | .....   | TGA      | AMGH      | TRET       | VTVIGDEEYKNSLV      |
| A.pisum              | .....                                   | ..... | .....  | .....   | GGAR     | IGNV      | NRIAT      | ITISSDDDFDSVV       |
| P.marinus            | .....                                   | ..... | .....  | .....   | GGAK     | FCS       | .....      | .....KTDGGH         |
| A.anophagefferens_1  | .....                                   | ..... | .....  | .....   | KNFK     | CAV       | .....      | .....ERAKFG         |
| E.huxleyi            | .....                                   | ..... | .....  | .....   | GGAS     | LGEI      | GRAVV      | IESDDERRALV         |
| C.intestinalis       | .....                                   | ..... | .....  | .....   | NFS      | QGS       | SHLGE      | HSAAVNVN..IN..      |
| B.floridae           | .....                                   | ..... | .....  | .....   | NFS      | LGS       | KIGEP      | PGAAGVF..LCKDE      |
| T.adhaerens_3        | .....                                   | ..... | .....  | .....   | NAS      | MGAR      | RIGEIG     | ATIVSFDIERDA        |
| N.vectensis_2        | .....                                   | ..... | .....  | .....   | DE       | STGA      | RIGN       | RTATVHIISSGI..      |
| consensus>50         | .....                                   | ..... | .....  | .....   | e        | iaemg     | .p.lge     | .....evii.es.efk.tv |

|                      | 730              | 740                 | 750       | 760        | 770       | 780             |                        |
|----------------------|------------------|---------------------|-----------|------------|-----------|-----------------|------------------------|
| H.sapiens_NCX1.1     | DKLIKKTNLALV...  | VGTNSWREQFI         | EAITVSAG  | E.E.....   | DDDDDECG  | EEKLPSCFDYVMHFL |                        |
| P.troglodytes_NCX1.1 | DKLIKKTNLALV...  | VGTNSWREQFI         | EAITVSAG  | E.E.....   | DDDDDECG  | EEKLPSCFDYVMHFL |                        |
| C.familiaris_NCX1.1  | DKLIKKTNLALV...  | VGTNSWREQFI         | EAITVSAG  | E.E.....   | DDDDDECG  | EEKLPSCFDYVMHFL |                        |
| F.catus_NCX1.1       | DKLIKKTNLALV...  | VGTNSWREQFI         | EAITVSAG  | E.E.....   | DDDDDECG  | EEKLPSCFDYVMHFL |                        |
| C.porcellus_NCX1.1   | DKLIKKTNLALV...  | VGTNSWREQFI         | EAITVSAG  | E.E.....   | DDDDDECG  | EEKLPSCFDYVMHFL |                        |
| B.taurus_NCX1.1      | DKLIKKTNLALV...  | VGTNSWREQFI         | EAITVSAG  | E.E.....   | DDDDDECG  | EEKLPSCFDYVMHFL |                        |
| R.norvegicus_NCX1.1  | DKLIKKTNLALV...  | VGTNSWREQFI         | EAITVSAG  | E.E.....   | DDDDDECG  | EEKLPSCFDYVMHFL |                        |
| M.musculus_NCX1.1    | DKLIKKTNLALV...  | VGTNSWREQFI         | EAITVSAG  | E.E.....   | DDDDDECG  | EEKLPSCFDYVMHFL |                        |
| M.mulatta_NCX1.3     | DKLIKKTNLALV...  | VGTNSWREQFI         | EAITVSAG  | E.E.....   | DDDDDECG  | EEKLPSCFDYVMHFL |                        |
| O.cuniculus_NCX1.2   | DKLIKKTNLALV...  | VGTNSWREQFI         | EAITVSAG  | E.E.....   | DDDDDECG  | EEKLPSCFDYVMHFL |                        |
| S.tropicalis_NCX1    | DKLIKKTNLALV...  | VGTNSWREQFI         | EAITVSAG  | E.E.....   | DDDDDECG  | EEKLPSCFDYVMHFL |                        |
| O.mossambicus_NCX1.1 | DKLIKKTNLALL..   | IGTNSWREQFI         | EAITVSSG  | DDD..E     | FCR       | EEKLPSCFDYVMHFL |                        |
| O.mykiss_NCX1        | DKLIKKTNLALL..   | IGTNSWRQOFM         | EAITVSSG  | DDDEDE     | CG        | EEKLPSCFDYVMHFL |                        |
| D.rerio_NCX1a        | DKLIKKTNLALL..   | VGTNSWRDQFV         | EAITVSSG  | DDDDDE     | CG        | QEKMPSCFDYVMHFL |                        |
| H.sapiens_NCX3.3     | DKLIKKTNLALV...  | VGTHSWRDQFM         | EAITVSSA  | G.....     | DEDEDE    | SG              | EEKLPSCFDYVMHFL        |
| R.norvegicus_NCX3.3  | DKLIKKTNLALV...  | VGTHSWRDQFM         | EAITVSSA  | G.....     | DEDEDE    | SG              | EEKLPSCFDYVMHFL        |
| M.musculus_NCX3.1    | DKLIKKTNLALV...  | VGTHSWRDQFM         | EAITVSSA  | G.....     | DEDEDE    | SG              | EEKLPSCFDYVMHFL        |
| G.gallus_NCX3        | DKLIKKTNLALV...  | VGTHSWRDQFL         | EAITVSSA  | G.....     | DEDEDE    | SG              | EEKLPSCFDYVMHFL        |
| D.rerio_NCX4a        | DKLIKKTNLALV...  | VGSSSWREQFV         | SAITVSSA  | G.....     | DDDEES    | SG              | EEKLPSCFDYIMHFL        |
| T.nigroviridis_NCX4a | DKLIKKTNLALV...  | VGSSSWREQFV         | SAITVSSA  | G.....     | DDDEES    | SG              | EEKLPSCFDYIMHFL        |
| H.sapiens_NCX2.1     | DKLIKKTNLALV...  | IGTHSWREQFL         | EAITVSSA  | DE.....    | EEEEDE    | GSR             | EEKLPSCFDYVMHFL        |
| R.norvegicus_NCX2.1  | DKLIKKTNLALV...  | IGTHSWREQFL         | EAITVSSA  | DE.....    | EEEEDE    | GSR             | EEKLPSCFDYVMHFL        |
| M.musculus_NCX2.1    | DKLIKKTNLALV...  | IGTHSWREQFL         | EAITVSSA  | DE.....    | EEEEDE    | GSR             | EEKLPSCFDYVMHFL        |
| S.kowalevskii_3      | DKLIKKANLSLV..   | VGTSWREQFV          | EAITVSSG  | .....      | DEDEDE    | G               | EEKLPSCFDYVMHFL        |
| T.adhaerens_2        | DKLLKKANLAMA...  | IGTSTWREQFRA        | AALTVNGD  | N.....     | DDDD      | ...             | EETKPTCTDYIMHYL        |
| L.opalescens_NCX     | DKLLKKANLSLV..   | VGTSWREQFI          | EAITVNAE  | G.....     | DDDD      | EGE             | EEKLPSCMDYIMHFL        |
| A.mellifera_NCX      | DKLVQRANASIL..   | LGTSSWKEQFT         | EALTVS    | GGDE.....  | D..DEGGG  | ...             | EPAAPSTLDYLMHGV        |
| D.melanogaster_NCX   | DKLVAKANVSAV..   | LGTSSWKEQFK         | DALTVIPAD | E.....     | SEFDND    | DE              | EEEVPSCFSYVSHFV        |
| H.magnipapillata     | DQMLSANKSIL...   | ..GSSSWAQKF         | DAFQVEY   | GG.....    | ..DEEEG   | ...             | DDVEPTYGDYVMHFL        |
| C.elegans_NCX1       | DRALVTANTSIM..   | VGTSWKKQFT          | EAWTLEP   | .....      | ..EE      | EDGE            | EVVTMEKVMHYI           |
| C.briggsae_NCX1      | DKVLVTANTSIM..   | VGTSWKKQFT          | EALWLEP   | .....      | ..EE      | EGDV            | SLQEKIMHYV             |
| C.elegans_NCX2       | DRMIKNANTRIM..   | LGTHSWREQFM         | EALVVS    | SAGDD..... | DDDEGED   | G               | EDEGEEKPEEPGCMYVMHVL   |
| C.briggsae_NCX2      | DRMIKNANTRIM..   | LGTHSWREQFM         | EALVVS    | SAGDD..... | DDDEED    | G               | DDGEEKPEEPGCMYFMHVL    |
| T.spiralis           | AKFEEKVRQSLLTCK  | LESSTWKEQFL         | LKAVSV    | NGG.....   | .....     | ETSDA           | SMVDCFAHII             |
| M.brevicollis_1      | EKVSRMRKINMDRFR  | VGSSDWKQF           | RDV       | .....      | ..AWPE    | ..              | REAGVLGIVMHLI          |
| Salpingoeca          | DKVTALLNLNDKFR   | IGGTDWKSQFV         | DAL       | .....      | ..AWPE    | ..              | EGSGTFAIVMHLI          |
| S.kowalevskii_1      | DRVVSITNVNLDRLR  | IGNASWADQFK         | EAM       | .....      | ..NVNGG   | DI              | ESATWVDYVMHFL          |
| S.kowalevskii_2      | DRVVSITNVNLDRLR  | IGNASWADQFK         | EAM       | .....      | ..NVNGG   | DI              | ESATWVDYVMHFL          |
| T.adhaerens_1        | DKVVALTRINVHRLK  | LGSQSWGEQFT         | NAM       | .....      | ..TVNGG   | DV              | ENATGMDYFLHFL          |
| D.pulex_1            | NRVLADMTTANVDSME | VHHSWTWSQIK         | DAM       | .....      | ..NVNGG   | DI              | ENATTSDDYVMHFL         |
| P.humanus_corporis   | DKMLAMTNLKLKTL   | IYRKTTWASQIK        | DAM       | .....      | ..NVNGG   | DV              | KNATATDYVLHFI          |
| O.dioica             | KRVAAQTHVALSKME  | IGGDSWYEQFV         | EAM       | .....      | ..NVNGG   | DI              | ENATGFDYIMHLL          |
| A.pisum              | DRMLLNTNINHALE   | LHRQTWAEQIKT        | AM        | .....      | ..TVNGG   | DL              | TNATTLTYVLHFF          |
| P.marinus            | DSLICTIWIKPKSGI  | SQGRTTVTDL          | LVHWGRMS  | LGATNWR    | EQFNEAL   | LVNGSRE         | EQEAGVGDWVMHVI         |
| A.anophagefferens_1  | KHTELVVIVADTET   | KDMI                | DNVQRYL   | ESNDASYN   | VGSTWQG   | QFSDAL          | KVGGGDADDFFKASAGDWMHII |
| E.huxleyi            | KQVASLMSLNV      | DAMQLAGA            | SWREQLA   | EAVTFEPP   | RQATTAR   | ALDGP           | LLGGASPPAALSLS         |
| C.intestinalis       | LEACGINSMSRVLID  | ENDTTWVGQ           | IRNAMIV   | .....      | ..GGEMDDY | G               | NESPSNTDFLMHAI         |
| B.floridiae          | LAERVANVPMGDTE   | EEDT                | SWGQFR    | SAMCL      | .....     | ..E             | SEDEDEGKKIPSPVQQLIMHFV |
| T.adhaerens_3        | LGDRVAEFAALNGVE  | GEDV                | SWAEQFT   | NALTV      | .....     | ..G             | SDIDFGEESPSNLDYILHFI   |
| N.vectensis_2        | .....            | .....               | ..AMI     | .....      | ..G       | DEDKD           | NEPLNSIDFIMHFL         |
| consensus>50         | dklikktnlal...   | vgt.swreqf.eaitvs.g | .....     | ddddd      | e.g       | .....           | ee.lpscfdyvmhfl        |

|                      | 790      | 800    | 810   | 820   | 830               | 840                                   |
|----------------------|----------|--------|-------|-------|-------------------|---------------------------------------|
| H.sapiens_NCX1.1     | TVFWKVLF | FVFP   | PTEY  | W..   | NGWACFIVSILMIGL   | LTAFIGDLASHFGCTIGLKDSVTAVV            |
| P.troglodytes_NCX1.1 | TVFWKVLF | FVFP   | PTEY  | W..   | NGWACFIVSILMIGL   | LTAFIGDLASHFGCTIGLKDSVTAVV            |
| C.familiaris_NCX1.1  | TVFWKVLF | FVFP   | PTEY  | W..   | NGWACFIVSILMIGL   | LTAFIGDLASHFGCTIGLKDSVTAVV            |
| F.catus_NCX1.1       | TVFWKVLF | FVFP   | PTEY  | W..   | NGWACFIVSILMIGL   | LTAFIGDLASHFGCTIGLKDSVTAVV            |
| C.porcullus_NCX1.1   | TVFWKVLF | FVFP   | PTEY  | W..   | NGWACFIVSILMIGL   | LTAFIGDLASHFGCTIGLKDSVTAVV            |
| B.taurus_NCX1.1      | TVFWKVLF | FVFP   | PTEY  | W..   | NGWACFIVSILMIGL   | LTAFIGDLASHFGCTIGLKDSVTAVV            |
| R.norvegicus_NCX1.1  | TVFWKVLF | FVFP   | PTEY  | W..   | NGWACFIVSILMIGL   | LTAFIGDLASHFGCTIGLKDSVTAVV            |
| M.musculus_NCX1.1    | TVFWKVLF | FVFP   | PTEY  | W..   | NGWACFIVSILMIGL   | LTAFIGDLASHFGCTIGLKDSVTAVV            |
| M.mulatta_NCX1.3     | TVFWKVLF | FVFP   | PTEY  | W..   | NGWACFIVSILMIGL   | LTAFIGDLASHFGCTIGLKDSVTAVV            |
| O.cuniculus_NCX1.2   | TVFWKVLF | FVFP   | PTEY  | W..   | NGWACFIVSILMIGL   | LTAFIGDLASHFGCTIGLKDSVTAVV            |
| S.tropicalis_NCX1    | TVFWKVLF | FVFP   | PTEY  | W..   | NGWACFIVSILMIGL   | LTAFIGDLASHFGCTIGLKDSVTAVV            |
| O.mossambicus_NCX1.1 | TIFWKL   | LLFAFV | PPTDY | W..   | NGWACFVVISI       | SMIGL                                 |
| O.mykiss_NCX1        | TVFWKL   | LLFAFV | PPTDY | W..   | NGWACFVVISI       | SMIGL                                 |
| D.rerio_NCX1a        | TVFWKVLF | FVFP   | PPTDY | W..   | NGWACFIVSILMIGL   | LTAFIGDLASHFGCTIGLKDSVTAVV            |
| H.sapiens_NCX3.3     | TVFWKVLF | FACV   | PTEYC | ..    | HGWACFIVSILMIGL   | LTAFIGDLASHFGCTIGLKDSVTAVV            |
| R.norvegicus_NCX3.3  | TVFWKVLF | FACV   | PTEYC | ..    | HGWACFIVSILMIGL   | LTAFIGDLASHFGCTIGLKDSVTAVV            |
| M.musculus_NCX3.1    | TVFWKVLF | FACV   | PTEYC | ..    | HGWACFIVSILMIGL   | LTAFIGDLASHFGCTIGLKDSVTAVV            |
| G.gallus_NCX3        | TVFWKVLF | FACV   | PTEYC | ..    | HGWACFIVSILMIGL   | LTAFIGDLASHFGCTIGLKDSVTAVV            |
| D.rerio_NCX4a        | TVFWKVLF | FVFP   | PTEY  | W..   | NGWACFIVSILMIGL   | LTAFIGDLASHFGCTIGLKDSVTAVV            |
| T.nigroviridis_NCX4a | TVFWKVLF | FVFP   | PTEY  | W..   | NGWACFIVSILMIGL   | LTAFIGDLASHFGCTIGLKDSVTAVV            |
| H.sapiens_NCX2.1     | TVFWKVLF | FACV   | PTEYC | ..    | HGWACFIVSILMIGL   | LTAFIGDLASHFGCTIGLKDSVTAVV            |
| R.norvegicus_NCX2.1  | TVFWKVLF | FACV   | PTEYC | ..    | HGWACFIVSILMIGL   | LTAFIGDLASHFGCTIGLKDSVTAVV            |
| M.musculus_NCX2.1    | TVFWKVLF | FACV   | PTEYC | ..    | HGWACFIVSILMIGL   | LTAFIGDLASHFGCTIGLKDSVTAVV            |
| S.kowalevskii_3      | SIFWKL   | ILFALV | PPTDI | W..   | GGWACFIVSILMIGL   | LTAFIGDLASHFGCTIGLKDSVTAVV            |
| T.adhaerens_2        | TIFWKL   | LIFALV | PPTDI | W..   | GGWACFIVSILMIGL   | LTAFIGDLASHFGCTIGLKDSVTAVV            |
| L.opalescens_NCX     | CLFWK    | VLFALV | PPTDI | W..   | GGWACFIVSILMIGL   | LTAFIGDLASHFGCTIGLKDSVTAVV            |
| A.mellifera_NCX      | TILWKL   | VLFALV | PPTDI | A..   | GGYLCFVVISI       | FGIGV                                 |
| D.melanogaster_NCX   | CLFWK    | VLFALV | PPTDI | C..   | GGYVTFVVISI       | FVIGV                                 |
| H.magnipapillata     | SFFWK    | VLFALV | PPTDI | W..   | GGWACFIVSILMIGL   | LTAFIGDLASHFGCTIGLKDSVTAVV            |
| C.elegans_NCX1       | ALPWK    | LLFALV | PPTDI | F..   | NGWLCFVVAIAMIGL   | LTAFIGDLASHFGCTIGLKDSVTAVV            |
| C.briggsae_NCX1      | ALPWK    | LLFALV | PPTDI | F..   | NGWCCFVVAIAMIGL   | LTAFIGDLASHFGCTIGLKDSVTAVV            |
| C.elegans_NCX2       | TVPWK    | LTFAV  | PPTDI | F..   | GGWATFVVAIAMIGL   | LTAFIGDLASHFGCTIGLKDSVTAVV            |
| C.briggsae_NCX2      | TVPWK    | LTFAV  | PPTDI | F..   | GGWATFVVAIAMIGL   | LTAFIGDLASHFGCTIGLKDSVTAVV            |
| T.spiralis           | AFPWK    | VIAAFV | PPTTI | F..   | GGWLAFFIVALALMIGL | LTAFIGDLASHFGCTIGLKDSVTAVV            |
| M.brevicollis_1      | TLPWK    | VLAACV | PPTVF | VH..  | GGWVAFGVALCFMIGL  | LTAFIGDLASHFGCTIGLKDSVTAVV            |
| Salpingoeca          | NIPWK    | IIAACV | PPTFL | LN..  | GGWVTFGSALMIGL    | LTAFIGDLASHFGCTIGLKDSVTAVV            |
| S.kowalevskii_1      | TFGWK    | VIFALV | PPPS  | FLNSG | GGWICFVVAIAMIGL   | LTAFIGDLASHFGCTIGLKDSVTAVV            |
| S.kowalevskii_2      | SFGWK    | VIFALV | PPPS  | FLDSG | GGWISFCVALTFMIGL  | LTAFIGDLASHFGCTIGLKDSVTAVV            |
| T.adhaerens_1        | TFGWK    | VIFALV | PPPS  | ML..  | GGWLTFFIASLGMIGL  | LTAFIGDLASHFGCTIGLKDSVTAVV            |
| D.pulex_1            | TFGWK    | LLFALV | PPAGI | W..   | GGWLSFVSLVVMIGL   | LTAFIGDLASHFGCTIGLKDSVTAVV            |
| P.humanus_corporis   | SFNWK    | VLSFV  | PPSMF | ..    | RGWLCFIVSLCAMIGL  | LTAFIGDLASHFGCTIGLKDSVTAVV            |
| O.dioica             | TFGFK    | TIFALV | PPSNM | G..   | GGFPCEFGLSLMIGL   | LTAFIGDLASHFGCTIGLKDSVTAVV            |
| A.pisum              | SFFWK    | VVFALV | PPAAV | FS..  | GGWLRFFTSLLMIGL   | LTAFIGDLASHFGCTIGLKDSVTAVV            |
| P.marinus            | TFPWK    | IVFALV | PPLEY | A..   | GGWLTFFISLSTMIGL  | LTAFIGDLASHFGCTIGLKDSVTAVV            |
| A.anophagefferens_1  | TLPWK    | VAFALV | PPTSY | G..   | GGWVCFYVALTFMIGL  | LTAFIGDLASHFGCTIGLKDSVTAVV            |
| E.huxleyi            | ALPWR    | LLFALV | PPRVA | ..    | GGWACFIVSILMIGL   | LTAFIGDLASHFGCTIGLKDSVTAVV            |
| C.intestinalis       | SMPWK    | IVFALV | PPTRH | AY..  | GGFPFAFISLGMIGL   | LTAFIGDLASHFGCTIGLKDSVTAVV            |
| B.floridiae          | TFFWK    | VLFALV | PPRSM | L..   | GGWPAFVMSLGMIGL   | LTAFIGDLASHFGCTIGLKDSVTAVV            |
| T.adhaerens_3        | AFLWK    | IIAATV | PPRTV | L..   | GGWPAFVLSLVYGMIGL | LTAFIGDLASHFGCTIGLKDSVTAVV            |
| N.vectensis_2        | TFFWK    | VLFALV | PPRPL | L..   | GGWPAFVLSLGMIGL   | LTAFIGDLASHFGCTIGLKDSVTAVV            |
| consensus>50         | tvfkwk   | vlfafv | pptey | ...   | gwaCFivsi.mig     | ltaIigdlashfgCtIglkds!tav.f!alGtsvppD |

|                      | 850      | 860     | 870       | 880     | 890                                     |
|----------------------|----------|---------|-----------|---------|-----------------------------------------|
| H.sapiens_NCX1.1     | TFASKVAA | TQDQY   | ADASIGNVT | GSAVNV  | FLGIGVAWSIAAIYHAA                       |
| P.troglodytes_NCX1.1 | TFASKVAA | TQDQY   | ADASIGNVT | GSAVNV  | FLGIGVAWSIAAIYHAA                       |
| C.familiaris_NCX1.1  | TFASKVAA | TQDQY   | ADASIGNVT | GSAVNV  | FLGIGVAWSIAAIYHAA                       |
| F.catus_NCX1.1       | TFASKVAA | TQDQY   | ADASIGNVT | GSAVNV  | FLGIGVAWSIAAIYHAA                       |
| C.porcullus_NCX1.1   | TFASKVAA | TQDQY   | ADASIGNVT | GSAVNV  | FLGIGVAWSIAAIYHAA                       |
| B.taurus_NCX1.1      | TFASKVAA | TQDQY   | ADASIGNVT | GSAVNV  | FLGIGVAWSIAAIYHAA                       |
| R.norvegicus_NCX1.1  | TFASKVAA | TQDQY   | ADASIGNVT | GSAVNV  | FLGIGVAWSIAAIYHAA                       |
| M.musculus_NCX1.1    | TFASKVAA | TQDQY   | ADASIGNVT | GSAVNV  | FLGIGVAWSIAAIYHAA                       |
| M.mulatta_NCX1.3     | TFASKVAA | TQDQY   | ADASIGNVT | GSAVNV  | FLGIGVAWSIAAIYHAA                       |
| O.cuniculus_NCX1.2   | TFASKVAA | TQDQY   | ADASIGNVT | GSAVNV  | FLGIGVAWSIAAIYHAA                       |
| S.tropicalis_NCX1    | TFASKVAA | TQDQY   | ADASIGNVT | GSAVNV  | FLGIGVAWSIAAIYHAA                       |
| O.mossambicus_NCX1.1 | TFASKVAA | TQDQY   | ADASIGNVT | GSAVNV  | FLGIGVAWSIAAVYHT                        |
| O.mykiss_NCX1        | TFASKVAA | TQDQY   | ADAFIGNVT | GSAVNV  | FLGIGVAWSIAAIYHNS                       |
| D.rerio_NCX1a        | TFASKVAA | TQDQY   | ADASIGNVT | GSAVNV  | FLGIGVAWSIAAIFHQS                       |
| H.sapiens_NCX3.3     | TFASKAAA | LQDQY   | ADASIGNVT | GSAVNV  | FLGIGLAWSVAAIYWAL                       |
| R.norvegicus_NCX3.3  | TFASKAAA | LQDQY   | ADASIGNVT | GSAVNV  | FLGIGLAWSVAAIYWAM                       |
| M.musculus_NCX3.1    | TFASKAAA | LQDQY   | ADASIGNVT | GSAVNV  | FLGIGLAWSVAAIYWAM                       |
| G.gallus_NCX3        | TFASKAAA | LQDQY   | ADASITNVT | GSAVNV  | FLGIGLAWSVAAIYWAS                       |
| D.rerio_NCX4a        | TFASKVAA | TQDQY   | ADASIGNVT | GSAVNV  | FLGIGVAWTIAAVYWHS                       |
| T.nigroviridis_NCX4a | TFASKVAA | TQDQY   | ADASIGNVT | GSAVNV  | FLGIGVAWTIAAVYWHS                       |
| H.sapiens_NCX2.1     | TFASKVAA | LQDQC   | ADASIGNVT | GSAVNV  | FLGLGVAWSVAAVYWAV                       |
| R.norvegicus_NCX2.1  | TFASKVAA | LQDQC   | ADASIGNVT | GSAVNV  | FLGLGVAWSVAAVYWAV                       |
| M.musculus_NCX2.1    | TFASKVAA | LQDQC   | ADASIGNVT | GSAVNV  | FLGLGVAWSVAAVYWAV                       |
| S.kowalevskii_3      | TFASKTAA | VQDKY   | ADASVGNVT | GSAVNV  | FLGIGLAWSAAIYWAA                        |
| T.adhaerens_2        | TFASKTAA | VNDKY   | ADSSIGNVT | GSAVNV  | FLGLGLAWCVAAVANAI                       |
| L.opalescens_NCX     | TFASKVAA | LNDKY   | ADSSIGNVT | GSAVNV  | FLGIGIAWSIAAIYHAA                       |
| A.mellifera_NCX      | TFASKVAA | CQDKY   | ADASVGNVT | GSAVNV  | FLGIGVAWSIAAIYHAL                       |
| D.melanogaster_NCX   | TFASMIAA | KHDEG   | ADNCIGNVT | GSAVNV  | FLGIGLAWTIAAVYHSS                       |
| H.magnipapillata     | TFASKVAT | INDEH   | ADGSIGNVT | GSAVNV  | FLGIGLAWSAAIYHAS                        |
| C.elegans_NCX1       | TFASRTAA | VGDQW   | ADGSIGNVT | GSAVNV  | FLGIGIAWMIACVHAY                        |
| C.briggsae_NCX1      | TFASRTAA | VGDQW   | ADGSIGNVT | GSAVNV  | FLGIGIAWMIACVHAY                        |
| C.elegans_NCX2       | TFASKVSA | VQDKY   | ADNAVGNVT | GSAVNV  | FLGIGIAWSMAAIYHWN                       |
| C.briggsae_NCX2      | TFASKVSA | VQDKY   | ADNAVGNVT | GSAVNV  | FLGIGIAWSMAAIYHWN                       |
| T.spiralis           | TFASRLAA | LQDKT   | ADNAIGNVT | GSAVNV  | FLGLGLPWFIAVYWAA                        |
| M.brevicollis_1      | TFASRSAT | LASKT   | ADAAVTNVT | GSAVNV  | FLGLGLSFWIAAVYWPA                       |
| Salpingoeca          | TFASMSAT | IASDT   | ADAAITNVT | GSAVNV  | FLGLGLSFWIAAVYWPV                       |
| S.kowalevskii_1      | LFASKTAA | VNEKY   | ADASIGNVT | GSAVNV  | FLGLGLSFWIASIYWTS                       |
| S.kowalevskii_2      | LCVSKKAS | VGEKY   | ADCCM     | TGSYSVY | VFGLGLSFWVTASIYWTS                      |
| T.adhaerens_1        | LFASKTAA | LNEKY   | ADNSIGNVT | GSAVNV  | FLGLGLPWLIIATIIYWNS                     |
| D.pulex_1            | LFASRAAA | MNEKY   | ADNAIGNVT | GSAVNV  | FLGLGLPWLIIASIIYHAS                     |
| P.humanus_corporis   | TFASRTAA | LKEQY   | ADTSIGNVT | GSAVNV  | FLGLGLPWLIIATIIYHTH                     |
| O.dioica             | LFASKIAA | TNEPN   | ADDAVGNVT | GSAVNV  | FLGLGLPWSMAAIYHYC                       |
| A.pisum              | ILGACMVT | RAETH   | ADEAMIIH  | AGSI    | IAVKVLMCVGLPWFISALYHYS                  |
| P.marinus            | TFASRLAA | MQDPY   | ADASIGNVT | GSAVNV  | FLGLGLPWFVIGSLYWS                       |
| A.anophagefferens_1  | AFASKAAT | INDDS   | ADAAVGNVT | GSAVNV  | FLGLGLPWSIAAIYWS                        |
| E.huxleyi            | TFASRTAA | VKERERH | ADSSIGNVT | GSAVNV  | FLGLGLPWLAAALFWASPRGAAQEASWRDRYRGEAWYSE |
| C.intestinalis       | TFASRTAA | LQDDY   | ADASIGNVT | GSAVNV  | FLGLGLPWFVIRTMYFAV                      |
| B.floridae           | TFASRTVA | LHDVH   | ADAAIGNVT | GSAVNV  | FLGLGLPWFVISTMYHLI                      |
| T.adhaerens_3        | TFASRNAA | VHDHS   | ADASIGNVT | GSAVNV  | FLGLGLPWFVLTYYRQI                       |
| N.vectensis_2        | TFASRSAA | LQDTG   | ADAAIGNVT | GSAVNV  | FLGLGLPWFVIMSTCYHAA                     |
| consensus>50         | tfaskvaa | tdqdy   | Adasignvt | Gsnavnv | flgigvawsiaaiyha                        |

|                      | 900                                                                      | 910           | 920         | 930           | 940    | 950           | 960                            |
|----------------------|--------------------------------------------------------------------------|---------------|-------------|---------------|--------|---------------|--------------------------------|
| H.sapiens_NCX1.1     | .NGEQFKVSPGT                                                             | LAFSVTLFTI    | FAFINVG     | VLLYRRRPEI    | .G.    | GELGGPRTAKLLT | SCLFVLLWLLYIFFS                |
| P.troglodytes_NCX1.1 | .NGEQFKVSPGT                                                             | LAFSVTLFTI    | FAFINVG     | VLLYRRRPEI    | .G.    | GELGGPRTAKLLT | SCLFVLLWLLYIFFS                |
| C.familiaris_NCX1.1  | .NGEQFKVSPGT                                                             | LAFSVTLFTI    | FAFINVG     | VLLYRRRPEI    | .G.    | GELGGPRTAKLLT | SCLFVLLWLLYIFFS                |
| F.catus_NCX1.1       | .NGEQFKVSPGT                                                             | LAFSVTLFTI    | FAFINVG     | VLLYRRRPEI    | .G.    | GELGGPRTAKLLT | SCLFVLLWLLYIFFS                |
| C.porcullus_NCX1.1   | .NGEQFKVSPGT                                                             | LAFSVTLFTI    | FAFINVG     | VLLYRRRPEI    | .G.    | GELGGPRTAKLLT | SCLFVLLWLLYIFFS                |
| B.taurus_NCX1.1      | .NGEQFKVSPGT                                                             | LAFSVTLFTI    | FAFINVG     | VLLYRRRPEI    | .G.    | GELGGPRTAKLLT | SCLFVLLWLLYIFFS                |
| R.norvegicus_NCX1.1  | .NGEQFKVSPGT                                                             | LAFSVTLFTI    | FAFINVG     | VLLYRRRPEI    | .G.    | GELGGPRTAKLLT | SCLFVLLWLLYIFFS                |
| M.musculus_NCX1.1    | .NGEQFKVSPGT                                                             | LAFSVTLFTI    | FAFINVG     | VLLYRRRPEI    | .G.    | GELGGPRTAKLLT | SCLFVLLWLLYIFFS                |
| M.mulatta_NCX1.3     | .NGEQFKVSPGT                                                             | LAFSVTLFTI    | FAFINVG     | VLLYRRRPEI    | .G.    | GELGGPRTAKLLT | SCLFVLLWLLYIFFS                |
| O.cuniculus_NCX1.2   | .NGEHFKVSPGT                                                             | LAFSVTLFTI    | FAFINVG     | VLLYRRRPEI    | .G.    | GELGGPRTAKLLT | SCLFVLLWLLYIFFS                |
| S.stropicalis_NCX1   | .NGDVFVSPGT                                                              | LAFSVTLFTI    | FAFINVG     | VLLYRRRPEI    | .G.    | GELGGPRTAKLLT | TALFTLWLLYIFFS                 |
| O.mossambicus_NCX1.1 | .QGQEFKVNPGT                                                             | LAFSVTLFTI    | FAFICIA     | VLLYRRRPEI    | .G.    | GELGGPIPKILIT | TCLFFSLWLMYIVFS                |
| O.mykiss_NCX1        | .KGNDFRVDPGT                                                             | LAFSVTLFTI    | FAFVAVA     | VLMYRRRPEI    | .G.    | GELGGPGRP     | KIATTCFFSLWLMYIVFS             |
| D.rerio_NCX1a        | .QGRQFRVDPGT                                                             | LAFSVTLFTI    | FAFVCI      | VLMYRRRPEI    | .G.    | GELGGPGRP     | KIATTCFFSLWLMYIVFS             |
| H.sapiens_NCX3.3     | .QGQEFHVSAGT                                                             | LAFSVTLFTI    | FAFVCIS     | VLLYRRRPHL    | .G.    | GELGGPGRP     | KLATTFWLFVSLWLLYILFA           |
| R.norvegicus_NCX3.3  | .QGQEFHVSAGT                                                             | LAFSVTLFTI    | FAFVCLS     | VLLYRRRPHL    | .G.    | GELGGPGRP     | KLATTFWLFVSLWLLYILFA           |
| M.musculus_NCX3.1    | .QGQEFHVSAGT                                                             | LAFSVTLFTI    | FAFVCLS     | VLLYRRRPHL    | .G.    | GELGGPGRP     | KLATTFWLFVSLWLLYILFA           |
| G.gallus_NCX3        | .QGQEFHVSAGT                                                             | LAFSVTLFTI    | FAFVCLS     | VLLYRRRPHL    | .G.    | GELGGPGRP     | KLATTFWLFVSLWLLYILFA           |
| D.rerio_NCX4a        | .QGGKFFQVPPGS                                                            | LAFSVTLFTI    | LALVCV      | TLLYRRRPSVSG  | .G.    | GELGGPGRP     | KLATTFWLFVSLWLLYILFA           |
| T.nigroviridis_NCX4a | .KGGKFFQVPPGS                                                            | LAFSVTLFTI    | MALVCV      | TLLYRRRPSVSG  | .G.    | GELGGPGRP     | KLATTFWLFVSLWLLYILFA           |
| H.sapiens_NCX2.1     | .QGRPFVEVRTGT                                                            | LAFSVTLFTV    | FAFVGI      | VLLYRRRPHI    | .G.    | GELGGPGRP     | KLATTFWLFVSLWLLYILFA           |
| R.norvegicus_NCX2.1  | .QGRPFVEVRTGT                                                            | LAFSVTLFTV    | FAFVGI      | VLLYRRRPHI    | .G.    | GELGGPGRP     | KLATTFWLFVSLWLLYILFA           |
| M.musculus_NCX2.1    | .QGRPFVEVRTGT                                                            | LAFSVTLFTV    | FAFVGI      | VLLYRRRPHI    | .G.    | GELGGPGRP     | KLATTFWLFVSLWLLYILFA           |
| H.sapiens_NCX1.3     | .KGEVFEVKPGS                                                             | LAFSVTIYSI    | FAFVIAIT    | VLMYRRRKLNTL  | .G.    | GELGGPKTT     | KIITSCFLVGLWLLYILFA            |
| T.adhaerens_2        | .KGEKFFVPSGS                                                             | LAFSVTIFCAV   | AVICIA      | VLMYRRRTPSVSG | .G.    | GELGGPGRP     | KIATTFWLFVSLWLLYILFA           |
| L.opalescens_NCX     | .NGTVFRVDPGT                                                             | LAFSVTIFCV    | FAVCTIV     | VLLYRRRHHLV   | .G.    | GELGGPGRP     | KIATTFWLFVSLWLLYILFA           |
| A.mellifera_NCX      | .HGDKFRVDPGN                                                             | LAFSVTLFCTE   | ACLVL       | VLLYRRR       | .KSI   | GELGGPFPV     | KVITSLILFFLWVFLYILMS           |
| D.melanogaster_NCX   | .HGMTFNVDPGT                                                             | IGFVALFCGE    | ALIAIM      | LIMYRRRWHKIG  | .G.    | AELGGPKVS     | KYISAAILVFWVYVVIC              |
| H.magnipapillata     | .NGNKFVDPGS                                                              | LGFSVLMFCLE   | ASVCI       | GILMYRRSSKNIR | .G.    | AELGGPSI      | SRYITFTFLFLWLIYLLVS            |
| C.elegans_NCX1       | .RGTKFLVATGS                                                             | LAFSVTMFLI    | GSVVCV      | ALLQYRRFNRKVN | .G.    | GELGGPMG      | WRISAGIFVSVWLLYILLS            |
| C.briggsae_NCX1      | .RGTKFLVSTGS                                                             | LAFSVTMFLI    | GSVVCV      | ALLQYRRFNRKIN | .G.    | GELGGPTSW     | RVISAGIFVSVWLLYILLS            |
| C.elegans_NCX2       | .QGTKFLVDPGN                                                             | LGFSVLI       | FCTEAVLCI   | IVLVR         | .NKKV  | GELGGPIAL     | RWMTAMFFASLWFMYL               |
| C.briggsae_NCX2      | .RGTKFLVDPGN                                                             | LGFSVLI       | FCTEAVLCI   | IVLVR         | .SKKV  | GELGGPIAL     | RWMTAMFFASLWFMYL               |
| T.spiralis           | .RGEAFVVSAGD                                                             | LGFSVLI       | FCTEAVLCI   | IVLVR         | .G.    | AELGGPTIP     | KWICSVTLILFWFLYILLS            |
| M.brevicollis_1      | HDGAFVVSAGD                                                              | LGFSVLI       | FCTEAVLCI   | IVLVR         | .YKF   | GAEELGGPY     | SRQ..FAFFFI                    |
| Salpingoeca          | YSNAVFWVPSGD                                                             | LAFSVIIFSL    | CCIC        | ICLGTLLVRR    | .YTV   | GAEELGGAY     | AKP..TAALFL                    |
| S.kowalevskii_1      | ..VFEMEAGALS                                                             | SFSVMYTI      | CAIMCLS     | LLVRRFIPFF    | GKAE   | ELGGPTAG      | RYSSIFLILLWIIYILLC             |
| S.kowalevskii_2      | ..VFVVDSSS                                                               | SFSVMYTI      | CAIMCLS     | LLVRRFIPFF    | GKAE   | ELGGPTAG      | RYSSIFLILLWIIYILLC             |
| T.adhaerens_1        | ..EFVAVPAGN                                                              | LASVILFTI     | CAVICIA     | ALLMRR        | IIPSF  | GSELGGPT      | TKSKYISGLLWIVYVVIS             |
| D.pulex_1            | ..EFKVEAGS                                                               | LGFSITVFTI    | ITAVLS      | LALLVTR       | CSAAC  | GRGELGGP      | LGTRYASAI                      |
| P.humanus_corporis   | ..VFVVPAGT                                                               | LGFSVLLFTI    | SAVIAI      | ALLIGRR       | NSSFC  | GKAE          | ELGGSVFFKLLSGGLLILWVYVIVMS     |
| O.dioica             | ..TFNVPPGS                                                               | LVFSVTIFSI    | CAVCTIA     | FLPLR         | TLSYFG | NAELGGP       | QKQKWFSGIFLILWLFYVLS           |
| A.pisum              | ..LFELIPSTR                                                              | IGFNVLLYSV    | MAILAVT     | VLMVRR        | NVFFPK | KAELGGP       | TKGRYITVAI                     |
| P.marinus            | YPDGGFVVEAGD                                                             | LSFSVMI       | FTICAF      | FLCLT         | VLVARR | .AKY          | GELGGTKHGRISAAILTYALEVDVTSN    |
| A.anophagefferens_1  | GKDVAFIVPAGN                                                             | LGLSVGV       | FVFCAC      | CTCLG         | VLYARR | .KAY          | GAEELGGDRTMANRHATLFWMLWFLYVAMS |
| E.huxleyi            | AMPVAFVVASGD                                                             | LGFSVAVFTV    | LALVCLA     | VLYARR        | .ATV   | GELGGGAAS     | KYSTATLFTALWLGWIWLS            |
| C.intestinalis       | GGQ..YIVDTDG                                                             | LDFAVTLFDS    | FAGVVCV     | VLLILRR       | .YVL   | GELGGSTRV     | KWASGIFLFTLWFIIVS              |
| B.floridiae          | GTQ..YRVLPGN                                                             | LRFAVFTFLAVG  | SLCCLMLFVRR | .KCF          | GELGGK | KVVKWISAL     | LMFSRWFVFIIVLC                 |
| T.adhaerens_3        | FNSMDYAI                                                                 | SPDMQFSVILFTV | VAGAGV      | ILLFRR        | .FVL   | GELGGDI       | KWQYITAAATLVLWVAVITLA          |
| N.vectensis_2        | GTV..YKVS                                                                | SGNLAFSVLVFAL | CGVCL       | FLVLR         | .YLY   | KGELGGPT      | LSKWTGLLLFLWFIYVLS             |
| consensus>50         | .ng.%%v.pg.lafs!t!%ti.a.icv.vllyRR.....g.gELGGpr..k.k..t..lfv.lwlllyi.ls |               |             |               |        |               |                                |

|                      |                             |
|----------------------|-----------------------------|
| H.sapiens_NCX1.1     | SLEAYCHIKGF                 |
| P.troglodytes_NCX1.1 | SLEAYCHIKGF                 |
| C.familiaris_NCX1.1  | SLEAYCHIKGF                 |
| F.catus_NCX1.1       | SLEAYCHIKGF                 |
| C.porcillus_NCX1.1   | SLEAYCHIKGF                 |
| B.taurus_NCX1.1      | SLEAYCHIKGF                 |
| R.norvegicus_NCX1.1  | SLEAYCHIKGF                 |
| M.musculus_NCX1.1    | SLEAYCHIKGF                 |
| M.mulatta_NCX1.3     | SLEAYCHIKGF                 |
| O.cuniculus_NCX1.2   | SLEAYCHIKGF                 |
| S.tropicalis_NCX1    | SLEAYCHIKGF                 |
| O.mossambicus_NCX1.1 | SLEAYCHVKGF                 |
| O.mykiss_NCX1        | SLEAYCHVKGF                 |
| D.rerio_NCX1a        | SMEAYCIKGF                  |
| H.sapiens_NCX3.3     | TLEAYCIKGF                  |
| R.norvegicus_NCX3.3  | TLEAYCIKGF                  |
| M.musculus_NCX3.1    | TLEAYCIKGF                  |
| G.gallus_NCX3        | TLEAYCIKGF                  |
| D.rerio_NCX4a        | SLEAYCHVPGF                 |
| T.nigroviridis_NCX4a | SLEAYCHVHSF                 |
| H.sapiens_NCX2.1     | SLEAYCHIRGF                 |
| R.norvegicus_NCX2.1  | SLEAYCHIRGF                 |
| M.musculus_NCX2.1    | SLEAYCHIRGF                 |
| S.kowalevskii_3      | SFESYIEGF                   |
| T.adhaerens_2        | SLESYCHIPGF                 |
| L.opalescens_NCX     | GLMSYCHIPGF                 |
| A.mellifera_NCX      | ILEAYGYIEGF                 |
| D.melanogaster_NCX   | ILEAYDVRV                   |
| H.magnipapillata     | GLESYCYFTLKF                |
| C.elegans_NCX1       | TLEAYCIKGF                  |
| C.briggsae_NCX1      | TLEAYVIKGF                  |
| C.elegans_NCX2       | ALEAYCIIPGF                 |
| C.briggsae_NCX2      | ALEAYCIIPGF                 |
| T.spiralis           | ALQAYGHISF                  |
| M.brevicollis_1      | SLQVEGYIASI                 |
| Salpingoeca          | SLSTYEHISL                  |
| S.kowalevskii_1      | SLQAYGYIHF                  |
| S.kowalevskii_2      | SFQSYDYIDF                  |
| T.adhaerens_1        | SLQVYRIIPVKT                |
| D.pulex_1            | SLETYGHITGF                 |
| P.humanus_corporis   | CLKEYRVLDVNF                |
| O.dioica             | TLQAYEFIPGF                 |
| A.pisum              | CFQPF                       |
| P.marinus            | GVALNSNLHLNYRDASDVDRGEY     |
| A.anophagefferens_1  | ILASEGIV                    |
| E.huxleyi            | IAKTEGDPRLARLLQQLPPQARALLGA |
| C.intestinalis       | SLKAYNYF                    |
| B.floridae           | SLKAYDLLPF                  |
| T.adhaerens_3        | SLRAYDVIRFQ                 |
| N.vectensis_2        | SLMAYGHISGL                 |
| consensus>50         | sleayc.i.gf                 |
