# Supplementary material for: Phylogeny and a structural model of plant MHX transporters
Source: PubMed Central journal article supplement (PMC3679957; doi:10.1186/1471-2229-13-75), 2013-05-02
Supplement: 1471-2229-13-75-S8.pdf [file 1471-2229-13-75-S8.pdf]

**Additional file 8. Alignment of angiosperm MHX proteins**

The file presents the alignment of all currently identified angiosperm MHX proteins. See the legends of Additional file 5 for details of sequence alignment and color annotation.

|                | 1  | 10                 | 20        | 30     | 40      |             |
|----------------|----|--------------------|-----------|--------|---------|-------------|
| A.thaliana     | .. | MASILNQTELQESSK    | VLGHLRCEN | FFLFP  | SENTLS  | DGLRGVLYFLG |
| A.halleri      | .. | MASILNQTELQEASK    | VLGHVRCEN | FFIFP  | SENTLS  | DGLRGVLYFLG |
| A.lyrata       | .. | MASILNQTELQEASK    | VLGHVRCEN | FFIFP  | SENTLS  | DGLRGVLYFLG |
| C.clementina   | .. | MASIHTQAIIESIRAFN  | LLHYEKCE  | SYLLFR | GETSLG  | DGFRFLYFLG  |
| R.communis     | .. | MALETNYQSGWSRFGLLN | LLASEKCE  | SYLVFR | GETGLSV | GFRTFLYFLG  |
| M.esculenta    | .. | MALETQNSAGSKFGLLN  | LLGREKCE  | SYLLFH | GETALD  | NGFRFLYFLA  |
| P.trichocarpa  | .. | MASAYNQSDGGRFGDTN  | IVGHEKCE  | SYFLFR | GETTLG  | EGFRFLYFLG  |
| P.persica      | .. | ..                 | ..        | ..     | ..      | ..          |
| C.papaya       | .. | ..                 | ..        | ..     | ..      | ..          |
| S.tuberosum    | .. | ..                 | ..        | ..     | ..      | ..          |
| S.lycopersicum | .. | ..                 | ..        | ..     | ..      | ..          |
| M.guttatus_1   | .. | ..                 | ..        | ..     | ..      | ..          |
| C.sativus      | .. | ..                 | ..        | ..     | ..      | ..          |
| G.max          | .. | ..                 | ..        | ..     | ..      | ..          |
| M.truncatula   | .. | ..                 | ..        | ..     | ..      | ..          |
| A.coerulea     | .. | ..                 | ..        | ..     | ..      | ..          |
| V.vinifera     | .. | ..                 | ..        | ..     | ..      | ..          |
| E.grandis      | .. | ..                 | ..        | ..     | ..      | ..          |
| M.guttatus_2   | .. | ..                 | ..        | ..     | ..      | ..          |
| O.sativa_J1    | .. | ..                 | ..        | ..     | ..      | ..          |
| O.sativa_I1    | .. | ..                 | ..        | ..     | ..      | ..          |
| O.sativa_J2    | .. | ..                 | ..        | ..     | ..      | ..          |
| T.aestivum     | .. | ..                 | ..        | ..     | ..      | ..          |
| B.distachyon   | .. | ..                 | ..        | ..     | ..      | ..          |
| Z.mays         | .. | ..                 | ..        | ..     | ..      | ..          |
| S.bicolor      | .. | ..                 | ..        | ..     | ..      | ..          |
| S.italica      | .. | ..                 | ..        | ..     | ..      | ..          |
| consensus>50   | .. | ..                 | ..        | ..     | ..      | ..          |

|                | 50     | 60    | 70     | 80      | 90     | 100   | 110   |        |       |        |        |     |       |      |      |     |     |     |    |
|----------------|--------|-------|--------|---------|--------|-------|-------|--------|-------|--------|--------|-----|-------|------|------|-----|-----|-----|----|
| A.thaliana     | LAYCFI | IGLSA | ITARFF | KSMENVV | KHSR   | KVVVT | IDPIT | KAEVIT | YK    | VWVNF  | TAD    | IS  | LLAF  | GTS  | SFP  | QIS | LA  |     |    |
| A.halleri      | LAYCFI | IGLSA | ITARFF | KSMENVV | KHSR   | KVVVA | IDPIT | KAEIIT | YK    | VWVNF  | TAD    | IS  | LLAF  | GTS  | SFP  | QIS | LA  |     |    |
| A.lyrata       | LAYCFI | IGLSA | ITARFF | KSMENVV | KHSR   | KVVVA | IDPIT | KAEVIT | YK    | VWVNF  | TAD    | IS  | LLAF  | GTS  | SFP  | QIS | LA  |     |    |
| C.clementina   | LAYCFI | IGLSA | ITARFF | KSMENVV | KHSR   | KVVVE | IDPV  | TKAEVV | RY    | EKVWNY | TA     | AD  | IS    | LLAF | GTS  | SFP | QIS | LA  |    |
| R.communis     | LAYCFI | IGLSA | ITGRFF | KSMENVV | KHSR   | KVVVE | IDPYS | NTEV   | IRY   | EKVWNY | TA     | AD  | IS    | LLAF | GTS  | SFP | QIS | LA  |    |
| M.esculenta    | LAYCFI | IGLSA | ITARFF | KSMENVV | KHSR   | KVVVE | IDPD  | TNTEV  | IRY   | EKVWNY | TA     | AD  | IS    | LLAF | GTS  | SFP | QIS | LA  |    |
| P.trichocarpa  | LAYCFI | IGLSA | ITARFF | KSMENVV | KHSR   | KVVVE | IDPY  | TNAE   | IRY   | EKVWNY | TA     | AD  | IS    | LLAF | GTS  | SFP | QIS | LA  |    |
| P.persica      | LAYCFV | IGLSA | ITARFF | KSMENVV | KHSR   | KVVVE | IDNP  | TGAE   | IRY   | EKVWNY | TA     | AD  | IS    | LLAF | GTS  | SFP | QIS | LA  |    |
| C.papaya       | LAYCFI | IGLSA | ITGRFF | KSMENVV | KHSR   | KVVVE | IDPI  | TNQE   | ITR   | EKVWNY | TA     | AD  | IS    | LLAF | GTS  | SFP | QIS | LA  |    |
| S.tuberosum    | LAYCFI | IGLSA | ITARFF | KSMENVV | KHSR   | KVVVE | IDPL  | TNTK   | IVK   | EKVWNY | TA     | AD  | IS    | LLAF | GTS  | SFP | QIS | LA  |    |
| S.lycopersicum | LAYCFI | IGLSA | ITARFF | KSMENVV | KHSR   | KVVVE | IDPL  | TNTK   | IVK   | EKVWNY | TA     | AD  | IS    | LLAF | GTS  | SFP | QIS | LA  |    |
| M.guttatus_1   | LAYCFI | IGLSA | ITSRFF | KSMENVV | KHSR   | KVVVE | IDPC  | TNTKT  | IVR   | EKVWNY | TA     | AD  | IS    | LLAF | GTS  | SFP | QIS | LA  |    |
| C.sativus      | LAYCFV | IGLSA | ITARFF | KSMENVV | KHSR   | KVVVE | IDPH  | TNTE   | IRY   | EKVWNY | TA     | AD  | IS    | LLAF | GTS  | SFP | QIS | LA  |    |
| G.max          | LAYCFI | IGLSA | ITARFF | KSMENVV | KHSR   | KVVVE | IDPV  | TKTET  | IRH   | EKVWNY | TA     | AD  | IS    | LLAF | GTS  | SFP | QIS | LA  |    |
| M.truncatula   | LAYCFI | IGLSA | ITSRFF | KSMENVV | KHSR   | KVVVE | IDPV  | TKAE   | TI    | RH     | EKVWNY | TA  | AD    | IS   | LLAF | GTS | SFP | QIS | LA |
| A.coerulea     | LAYCFI | IGLSA | ITARFF | KSMENVV | KHSR   | KVVVE | IDHN  | TNTE   | EVIR  | H      | EKVWNY | TA  | AD    | IS   | LLAF | GTS | SFP | QIS | LA |
| V.vinifera     | LAYCFI | IGLSA | ITARFF | KSMENVV | KHSR   | KVVVE | IDPR  | SNT    | E     | IRH    | EKVWNY | TA  | AD    | IS   | LLAF | GTS | SFP | QIS | LA |
| E.grandis      | LAYCFI | IGLSA | ITARFF | KSMENVV | KHSR   | KVVVE | IDPQ  | TNSK   | VVR   | Q      | EKVWNY | TA  | AD    | IS   | LLAF | GTS | SFP | QIS | LA |
| M.guttatus_2   | LAYCFV | IGLSA | ITDRFF | KSMENVV | KHSR   | KVVVE | IDPL  | TNTK   | IVK   | EKVWNY | TA     | AD  | IS    | LLAF | GTS  | SFP | QIS | LA  |    |
| O.sativa_J1    | LAYCFI | IGLSA | ITGRFF | KSMENVV | KHSR   | KVVVE | IDPH  | TNAT   | IVKH  | EKVWNY | TA     | AD  | IS    | LLAF | GTS  | SFP | QIS | LA  |    |
| O.sativa_I1    | LAYCFI | IGLSA | ITGRFF | KSMENVV | KHSR   | KVVVE | IDPH  | TNAT   | IVKH  | EKVWNY | TA     | AD  | IS    | LLAF | GTS  | SFP | QIS | LA  |    |
| O.sativa_J2    | LAYCFI | IGLSA | ITGRFF | KSMENVV | KHSR   | KVVVE | IDPH  | TNAT   | IVKH  | EKVWNY | TA     | AD  | IS    | LLAF | GTS  | SFP | QIS | LA  |    |
| T.aestivum     | LAYCFI | IGLSA | ITARFF | KSMENVV | KHSR   | KVVVE | IDPH  | TNAT   | IVKH  | EKVWNY | TA     | AD  | IS    | LLAF | GTS  | SFP | QIS | LA  |    |
| B.distachyon   | LGYCFI | IGLSA | ITARFF | KSMENVV | KHSR   | KVVVE | IDPH  | TNTP   | IVKH  | EKVWNY | TA     | AD  | IS    | LLAF | GTS  | SFP | QIS | LA  |    |
| Z.mays         | LAYCFV | IGLSA | ITARFF | KSMENVV | KHSR   | KVVVE | IDPR  | TGAP   | VVR   | R      | EKVWNY | TA  | AD    | IS   | LLAF | GTS | SFP | QIS | LA |
| S.bicolor      | LAYCFI | IGLSA | ITARFF | KSMENVV | KHSR   | KVVVE | IDPH  | TKEP   | VVKH  | EKVWNY | TA     | AD  | IS    | LLAF | GTS  | SFP | QIS | LA  |    |
| S.italica      | LAYCFI | IGLSA | ITARFF | KSMENVV | KHSR   | KVVVE | IDPH  | TNAP   | VVKH  | EKVWNY | TA     | AD  | IS    | LLAF | GTS  | SFP | QIS | LA  |    |
| consensus>50   | laYCFi | IGLSA | ItARFF | .SMEN!  | !vkhsR | .!v.. | !#p   | .tn    | .evir | .eKVWN | %t!    | AD! | .LLAF | GTS  | SFP  | QIS | LA  |     |    |

|                | 120     | 130   | 140 | 150    | 160    | 170 | 180   |      |     |        |     |    |     |     |     |   |        |   |     |   |
|----------------|---------|-------|-----|--------|--------|-----|-------|------|-----|--------|-----|----|-----|-----|-----|---|--------|---|-----|---|
| A.thaliana     | TIDAIRN | MGERY | AGG | GPGLTV | GSAAFD | L   | FFPIH | AVCV | VVP | PKAGEL | KK  | IS | DLG | VWV | VEL | V | WSFWAY | I | WLY | I |
| A.halleri      | TIDAIRN | IGERY | AGG | GPGLTV | GSAAFD | L   | FFPIH | AVCV | VVP | PKAGEL | KK  | IS | DLG | VWV | VEL | V | WSFWAY | I | WLY | I |
| A.lyrata       | TIDAIRN | IGERY | AGG | GPGLTV | GSAAFD | L   | FFPIH | AVCV | VVP | PKAGEL | KK  | IS | DLG | VWV | VEL | V | WSFWAY | I | WLY | I |
| C.clementina   | TIDAIRS | IGNLY | AGG | GPGLTV | GSAAFD | L   | FFPIH | AVCV | VVP | PKAGEL | KK  | IS | DLG | VWV | VEL | V | WSFWAY | I | WLY | I |
| R.communis     | TIDAIRN | IGNLY | AGG | GPGLTV | GSAAFD | L   | FFPIH | AVCV | VVP | PKAGEL | KK  | IS | DLG | VWV | VEL | V | WSFWAY | I | WLY | I |
| M.esculenta    | TIDAIRN | IGNLY | AGG | GPGLTV | GSAAFD | L   | FFPIH | AVCV | VVP | PKAGEL | KK  | IS | DLG | VWV | VEL | V | WSFWAY | I | WLY | I |
| P.trichocarpa  | TIDAIQN | IGNLY | AGG | GPGLTV | GSAAFD | L   | FFPIH | AVCV | VVP | PKAGEL | KK  | IS | DLG | VWV | VEL | V | WSFWAY | I | WLY | I |
| P.persica      | TIDAIRN | IGNLY | AGG | GPGLTV | GSAAFD | L   | FFPIH | AVCV | VVP | PKAGEL | KK  | IS | DLG | VWV | VEL | V | WSFWAY | I | WLY | I |
| C.papaya       | TIDAIRN | IGNLN | AGG | GPGLTV | GSAAFD | L   | FFPIH | AVCV | VVP | PKAGEL | KK  | IS | DLG | VWV | VEL | V | WSFWAY | I | WLY | I |
| S.tuberosum    | TIDAIRN | IGKLY | AGG | GPGLTV | GSAAFD | L   | FFPIH | AVCV | VVP | PKAGEL | KK  | IS | DLG | VWV | VEL | V | WSFWAY | I | WLY | I |
| S.lycopersicum | TIDAIRN | IGKLY | AGG | GPGLTV | GSAAFD | L   | FFPIH | AVCV | VVP | PKAGEL | KK  | IS | DLG | VWV | VEL | V | WSFWAY | I | WLY | I |
| M.guttatus_1   | TIDAIRN | IGSLY | AGG | GPGLTV | GSAAFD | L   | FFPIH | AVCV | VVP | PKAGEL | KK  | IS | DLG | VWV | VEL | V | WSFWAY | I | WLY | I |
| C.sativus      | TIDAIRN | IGNLY | AGG | GPGLTV | GSAAFD | L   | FFPIH | AVCV | VVP | PKAGEL | KK  | IS | DLG | VWV | VEL | V | WSFWAY | I | WLY | I |
| G.max          | TIDAIQN | IGKLY | AGG | GPGLTV | GSAAFD | L   | FFPIH | AVCV | VVP | PKAGEL | KK  | IS | DLG | VWV | VEL | V | WSFWAY | I | WLY | I |
| M.truncatula   | TIDAIRN | IGDLY | AGG | GPGLTV | GSAAFD | L   | FFPIH | AVCV | VVP | PKAGEL | KK  | IS | DLG | VWV | VEL | V | WSFWAY | I | WLY | I |
| A.coerulea     | TIDAIRN | IGQIY | AGG | GPGLTV | GSAAFD | L   | FFPIH | AVCV | VVP | PKAGEL | KK  | IS | DLG | VWV | VEL | V | WSFWAY | I | WLY | I |
| V.vinifera     | IDSIQN  | IGSRY | AGG | GPGLTV | GSAAFD | L   | FFPIH | AVCV | VVP | PKAGEL | KK  | IS | DLG | VWV | VEL | V | WSFWAY | I | WLY | I |
| E.grandis      | TIDALRN | IGELY | AGG | GPGLTV | GSAAFD | L   | FFPIH | AVCV | VVP | PKAGEL | KK  | IS | DLG | VWV | VEL | V | WSFWAY | I | WLY | I |
| M.guttatus_2   | TIDAIRN | IGSLT | AGG | GPGLTV | GSAAFD | L   | FFPIH | AVCV | VVP | PKAGEL | KK  | IS | DLG | VWV | VEL | V | WSFWAY | I | WLY | I |
| O.sativa_J1    | TIDAIRN | IGQLT | AGG | GPGLTV | GSAAFD | L   | FFPIH | AVCV | VMP | PRAGSK | KK  | IS | DLG | VWV | VEL | V | WSFWAY | I | WLY | I |
| O.sativa_I1    | TIDAIRN | IGQLT | AGG | GPGLTV | GSAAFD | L   | FFPIH | AVCV | VMP | PRAGSK | KK  | IS | DLG | VWV | VEL | V | WSFWAY | I | WLY | I |
| O.sativa_J2    | TIDAIRN | IGQLT | AGG | GPGLTV | GSAAFD | L   | FFPIH | AVCV | VMP | PRAGSK | KK  | IS | DLG | VWV | VEL | V | WSFWAY | I | WLY | I |
| T.aestivum     | TIDAIRN | IGQLT | AGG | GPGLTV | GSAAFD | L   | FFPIH | AVCV | VMP | PRAGSK | KK  | IS | DLG | VWV | VEL | V | WSFWAY | I | WLY | I |
| B.distachyon   | TIDAIRN | IGQLT | AGG | GPGLTV | GSAAFD | L   | FFPIH | AVCV | VMP | PRAGSK | KK  | IS | DLG | VWV | VEL | V | WSFWAY | I | WLY | I |
| Z.mays         | TIDAIRN | IGQLT | AGG | GPGLTV | GSAAFD | L   | FFPIH | AVCV | VMP | PRAGSK | KK  | IS | DLG | VWV | VEL | V | WSFWAY | I | WLY | I |
| S.bicolor      | TIDAIRN | IGQLT | AGG | GPGLTV | GSAAFD | L   | FFPIH | AVCV | VMP | PRAGSK | KK  | IS | DLG | VWV | VEL | V | WSFWAY | I | WLY | I |
| S.italica      | TIDAIRN | IGQLT | AGG | GPGLTV | GSAAFD | L   | FFPIH | AVCV | VMP | PRAGSK | KK  | IS | DLG | VWV | VEL | V | WSFWAY | I | WLY | I |
| consensus>50   | tIDairn | Igqly | AGG | GPGLTV | GSAAFD | \$  | FFPIH | AVCV | vvp | PkaGe  | lKk | IS | DLg | VWV | VEL | V | WSFWAY | I | WLY | I |

|                | 190       | 200      | 210      | 220      | 230        | 240        | 250       |        |       |        |          |
|----------------|-----------|----------|----------|----------|------------|------------|-----------|--------|-------|--------|----------|
| A.thaliana     | ILEVWS    | PNVITLV  | EALLTVLQ | YGLLLVHA | YAQDKRWPYL | SLPMSR     | GDPEE     | WVPE   | EIDT  | SKDND  | NDVHD    |
| A.halleri      | ILEVWS    | PNVITLV  | EALLTVLQ | YGLLLVHA | YAQDKRWPYL | SLPMSR     | GDPEE     | WVPE   | EIDT  | SKDND  | NDVHD    |
| A.lyrata       | ILEVWS    | PNVITLV  | EALLTVLQ | YGLLLVHA | YAQDKRWPYL | SLPMSR     | GDPEE     | WVPE   | EIDT  | SKDND  | NDVHD    |
| C.clementina   | ILEVWT    | PNVITLV  | EALLTVLQ | YGLLLVHA | YAQDKRWPYL | SLPIAR     | TERPE     | WVPE   | QETTS | CKDENC | DYDEC    |
| R.communis     | ILEVWT    | PNVITLV  | EALLTVLQ | YGLLLVHA | YAQDKRWPYL | SLPIER     | TERPE     | WVPE   | EATSK | HKRPH  | LDKVHEPH |
| M.esculenta    | ILEVWT    | PNVITLV  | EALLTVLQ | YGLLLVHA | YAQDKRWPYL | SLPLGR     | TERPE     | WVPE   | EITSK | HKRPH  | LDKVHEPH |
| P.trichocarpa  | ILEVWT    | PNVITLV  | EALLTVLQ | YGLLLVHA | YAQDKRWPYL | SLPIPR     | TERPE     | WVPE   | GVPSP | PTHENN | YVGE     |
| P.persica      | ILEVWT    | PNVITLV  | EALLTVLQ | YGLLLVHA | YAQDKRWPYL | SLPLPR     | TERPE     | WVPE   | AEVVT | CKSDS  | GPCNNY   |
| C.papaya       | ILEVWT    | PNVITLV  | EALLTVLQ | YGLLLVHA | YAQDKRWPYL | SLPIGR     | TERPE     | WVPE   | EVAS  | VDHNN  | DKF      |
| S.tuberosum    | ILEVWT    | PNVITLV  | EALLTVLQ | YGLLLVHA | YAQDKRWPYL | SLPLER     | TERPE     | WVPE   | AEVVT | CKSDS  | GPCNNY   |
| S.lycopersicum | ILEVWT    | PNVITLV  | EALLTVLQ | YGLLLVHA | YAQDKRWPYL | SLPLER     | TERPE     | WVPE   | AEVVT | CKSDS  | GPCNNY   |
| M.guttatus_1   | ILEVWT    | PNVITLV  | EALLTVLQ | YGLLLVHA | YAQDKRWPYL | SLPIGR     | TERPE     | WVPE   | EITSK | HKRPH  | LDKVHEPH |
| C.sativus      | ILEVWT    | PKVITLV  | EALLTVLQ | YGLLLVHA | YAQDKRWPYL | SLPLAR     | TERPE     | WVPE   | EIDT  | CKQDN  | PCREEF   |
| G.max          | ILEVWT    | PNVITLV  | EALLTVLQ | YGLLLVHA | YAQDKRWPYL | SLPIAR     | TERPE     | WVPE   | ETPY  | FQHEA  | HAEVDF   |
| M.truncatula   | ILEVWT    | PNVITLV  | EALLTVLQ | YGLLLVHA | YAQDKRWPYL | SLPIAR     | TERPE     | WVPE   | ETPK  | QKSH   | HERVEC   |
| A.coerulea     | ILEVWT    | PNVITLV  | EALLTVLQ | YGLLLVHA | YAQDKRWPYL | SLPLAR     | TERPE     | WVPE   | EASL  | DKLNN  | DYSEI    |
| V.vinifera     | ILEVWT    | PNVITLV  | EALLTVLQ | YGLLLVHA | YAQDKRWPYL | SLPLPR     | TERPE     | WVPE   | EASL  | DKLNN  | DYSEI    |
| E.grandis      | ILKVT     | PDIVT    | LWEALL   | TVLQF    | GLLLVHA    | YAQDKRWPYL | SLPLAR    | GERPE  | EWVPE | EASL   | YKVDN    |
| M.guttatus_2   | ILKIWT    | PNVITLV  | EALLTVLQ | YGLLLVHA | YAQDKRWPYL | SLPMTS     | TERPE     | WVPE   | EKNAP | YRDN   | GKTR     |
| O.sativa_J1    | ILEVWT    | PRVITLV  | EALLTVLQ | YGLLLVHA | YAQDKRWPYL | SIPLAR     | GERPE     | WVPE   | EASL  | VDYDN  | YD       |
| O.sativa_J2    | ILEVWT    | PRVITLV  | EALLTVLQ | YGLLLVHA | YAQDKRWPYL | SIPLAR     | GERPE     | WVPE   | EASL  | VDYDN  | YD       |
| O.sativa_I1    | ILEVWT    | PRVITLV  | EALLTVLQ | YGLLLVHA | YAQDKRWPYL | SIPLAR     | GERPE     | WVPE   | EASL  | VDYDN  | YD       |
| O.sativa_J2    | ILEVWT    | PRVITLV  | EALLTVLQ | YGLLLVHA | YAQDKRWPYL | SIPLAR     | GERPE     | WVPE   | EASL  | VDYDN  | YD       |
| T.aestivum     | ILEVWT    | PNVITLV  | EALLTVLQ | YGLLLVHA | YAQDKRWPYL | SIPLVR     | GERPE     | WVPE   | EADT  | SLHDK  | NC       |
| B.distachyon   | ILEVWT    | PNVITLV  | EALLTVLQ | YGLLLVHA | YAQDKRWPYL | SIPLVR     | GERPE     | WVPE   | EADT  | SLHDK  | NC       |
| Z.mays         | ILEVWT    | PRVITLV  | EALLTVLQ | YGLLLVHA | YAQDKRWPYL | SIPFAR     | GERPE     | WVPE   | EDVS  | AVYAK  | CD       |
| S.bicolor      | ILEVWT    | PRVITLV  | EALLTVLQ | YGLLLVHA | YAQDKRWPYL | SIPFAR     | GERPE     | WVPE   | EDVS  | AVYAK  | CD       |
| S.italica      | ILEVWT    | PRVITLV  | EALLTVLQ | YGLLLVHA | YAQDKRWPYL | SIPFAR     | GERPE     | WVPE   | EDVS  | AVYAK  | CD       |
| consensus>50   | Ile!WtPn! | !TlweAll | TlVlQ%   | GLLLiHa  | YAQDKrwp%  | lSlPl.R.   | #Rpe#WVPE | E.s... | ddn   | .....  |          |

|                | 260     | 270      | 280       | 290     | 300   | 310    |        |          |        |         |        |        |      |
|----------------|---------|----------|-----------|---------|-------|--------|--------|----------|--------|---------|--------|--------|------|
| A.thaliana     | VYSDAAQ | EAVESGSR | NIVDIFS   | IHSAN   | ..... | NDTGT  | TYHTVA | DTP      | PDSATK | KGKAKN  | STVFDI | WKHQ   |      |
| A.halleri      | VYSDAAQ | EAVESGSR | NIVDIFS   | IHSAN   | ..... | NDTGT  | TYHTVA | DTP      | PDSATK | KGKAKN  | STVFDI | WKHQ   |      |
| A.lyrata       | VYSDAAQ | EAVESGSR | NIVDIFS   | IHSAN   | ..... | NNTGT  | TYHTVA | DTP      | PDSATK | KGKAKN  | STVFDI | WKHQ   |      |
| C.clementina   | SEIL... | QVGEDESR | NIVDIFS   | IHSAN   | ..... | NDTGT  | TYHTVA | DTP      | PDSATK | KGKAKN  | STVFDI | WKHQ   |      |
| R.communis     | SEIV... | QVGEDESR | NIVDIFS   | IHSAN   | ..... | NDTGT  | TYHTVA | DTP      | PDSATK | KGKAKN  | STVFDI | WKHQ   |      |
| M.esculenta    | SEIL... | QVGEDESR | NIVDIFS   | IHSAN   | ..... | NDTGT  | TYHTVA | DTP      | PDSATK | KGKAKN  | STVFDI | WKHQ   |      |
| P.trichocarpa  | SEIL... | QVGEDESR | NIVDIFS   | IHSAN   | ..... | NDTGT  | TYHTVA | DTP      | PDSATK | KGKAKN  | STVFDI | WKHQ   |      |
| P.persica      | SEIL... | QVGEDESR | NIVDIFS   | IHSAN   | ..... | NDTGT  | TYHTVA | DTP      | PDSATK | KGKAKN  | STVFDI | WKHQ   |      |
| C.papaya       | SEIV... | QVGEDESR | NIVDIFS   | IHSAN   | ..... | NDTGT  | TYHTVA | DTP      | PDSATK | KGKAKN  | STVFDI | WKHQ   |      |
| S.tuberosum    | SEIV... | QVGEDESR | NIVDIFS   | IHSAN   | ..... | NDTGT  | TYHTVA | DTP      | PDSATK | KGKAKN  | STVFDI | WKHQ   |      |
| S.lycopersicum | SEIV... | QVGEDESR | NIVDIFS   | IHSAN   | ..... | NDTGT  | TYHTVA | DTP      | PDSATK | KGKAKN  | STVFDI | WKHQ   |      |
| M.guttatus_1   | EDDH... | ESGR...  | NIVDIFS   | IHSAN   | ..... | NDTGT  | TYHTVA | DTP      | PDSATK | KGKAKN  | STVFDI | WKHQ   |      |
| C.sativus      | SEIL... | QVGEDESR | NIVDIFS   | IHSAN   | ..... | NDTGT  | TYHTVA | DTP      | PDSATK | KGKAKN  | STVFDI | WKHQ   |      |
| G.max          | SDIK... | HVNE     | ENG       | DIVDIFS | IHSAN | .....  | NDTGT  | TYHTVA   | DTP    | PDSATK  | KGKAKN | STVFDI | WKHQ |
| M.truncatula   | SEIN... | QVGEDESR | NIVDIFS   | IHSAN   | ..... | NDTGT  | TYHTVA | DTP      | PDSATK | KGKAKN  | STVFDI | WKHQ   |      |
| A.coerulea     | LQLS... | E...     | ENG       | DIVDIFS | IHSAN | .....  | NDTGT  | TYHTVA   | DTP    | PDSATK  | KGKAKN | STVFDI | WKHQ |
| V.vinifera     | SELF... | QVGEDESR | NIVDIFS   | IHSAN   | ..... | NDTGT  | TYHTVA | DTP      | PDSATK | KGKAKN  | STVFDI | WKHQ   |      |
| E.grandis      | SEIL... | QVGEDESR | NIVDIFS   | IHSAN   | ..... | NDTGT  | TYHTVA | DTP      | PDSATK | KGKAKN  | STVFDI | WKHQ   |      |
| M.guttatus_2   | ..DNYP  | EVDEDR   | NIVDIFS   | IHSAN   | ..... | NDTGT  | TYHTVA | DTP      | PDSATK | KGKAKN  | STVFDI | WKHQ   |      |
| O.sativa_J1    | .GIGDIL | PGQ...   | NIVDIFS   | IHSAN   | ..... | NDTGT  | TYHTVA | DTP      | PDSATK | KGKAKN  | STVFDI | WKHQ   |      |
| O.sativa_I1    | .GIGDIL | PGQ...   | NIVDIFS   | IHSAN   | ..... | NDTGT  | TYHTVA | DTP      | PDSATK | KGKAKN  | STVFDI | WKHQ   |      |
| O.sativa_J2    | .GIGDIL | PGQ...   | NIVDIFS   | IHSAN   | ..... | NDTGT  | TYHTVA | DTP      | PDSATK | KGKAKN  | STVFDI | WKHQ   |      |
| T.aestivum     | .ENSDIL | PRE...   | NIVDIFS   | IHSAN   | ..... | NDTGT  | TYHTVA | DTP      | PDSATK | KGKAKN  | STVFDI | WKHQ   |      |
| B.distachyon   | .ESSEIL | PRE...   | NIVDIFS   | IHSAN   | ..... | NDTGT  | TYHTVA | DTP      | PDSATK | KGKAKN  | STVFDI | WKHQ   |      |
| Z.mays         | .GIDETL | PMGADG   | NIVDIFS   | IHSAN   | ..... | NDTGT  | TYHTVA | DTP      | PDSATK | KGKAKN  | STVFDI | WKHQ   |      |
| S.bicolor      | .DTNETL | PIISANR  | NIVDIFS   | IHSAN   | ..... | NDTGT  | TYHTVA | DTP      | PDSATK | KGKAKN  | STVFDI | WKHQ   |      |
| S.italica      | .ETSEIL | PGSSDK   | NIVDIFS   | IHSAN   | ..... | NDTGT  | TYHTVA | DTP      | PDSATK | KGKAKN  | STVFDI | WKHQ   |      |
| consensus>50   | .e..... | q.....   | n.nivdifs | ihs     | ..... | v..... | d..... | e.s..... | k..... | ed..... | lsiwkq | q      |      |

|                | 320    | 330  | 340      | 350   | 360    | 370    | 380    |          |          |      |       |      |      |
|----------------|--------|------|----------|-------|--------|--------|--------|----------|----------|------|-------|------|------|
| A.thaliana     | FVDAIT | LETS | ESKKVDSI | YLRIR | AKSFW  | HLLLPW | KLLFAF | VPPCNIAH | GWIAF    | ICSL | LFISG | VAFV | TRF  |
| A.halleri      | FVDAIT | LETS | ESKKVDSI | YLRIR | AKSFW  | HLLLPW | KLLFAF | VPPCNIAH | GWIAF    | ICSL | LFISG | VAFV | TRF  |
| A.lyrata       | FVDAIT | LETS | ESKKVDSI | YLRIR | AKSFW  | HLLLPW | KLLFAF | VPPCNIAH | GWIAF    | ICSL | LFISG | VAFV | TRF  |
| C.clementina   | FVDAIT | LETS | ESKKVDSI | YLRIR | AKSFW  | HLLLPW | KLLFAF | VPPCNIAH | GWIAF    | ICSL | LFISG | VAFV | TRF  |
| R.communis     | FVDAIT | LETS | ESKKVDSI | YLRIR | AKSFW  | HLLLPW | KLLFAF | VPPCNIAH | GWIAF    | ICSL | LFISG | VAFV | TRF  |
| M.esculenta    | FVDAIT | LETS | ESKKVDSI | YLRIR | AKSFW  | HLLLPW | KLLFAF | VPPCNIAH | GWIAF    | ICSL | LFISG | VAFV | TRF  |
| P.trichocarpa  | FVDAIT | LETS | ESKKVDSI | YLRIR | AKSFW  | HLLLPW | KLLFAF | VPPCNIAH | GWIAF    | ICSL | LFISG | VAFV | TRF  |
| P.persica      | FVDAIT | LETS | ESKKVDSI | YLRIR | AKSFW  | HLLLPW | KLLFAF | VPPCNIAH | GWIAF    | ICSL | LFISG | VAFV | TRF  |
| C.papaya       | FVDAIT | LETS | ESKKVDSI | YLRIR | AKSFW  | HLLLPW | KLLFAF | VPPCNIAH | GWIAF    | ICSL | LFISG | VAFV | TRF  |
| S.tuberosum    | FVDAIT | LETS | ESKKVDSI | YLRIR | AKSFW  | HLLLPW | KLLFAF | VPPCNIAH | GWIAF    | ICSL | LFISG | VAFV | TRF  |
| S.lycopersicum | FVDAIT | LETS | ESKKVDSI | YLRIR | AKSFW  | HLLLPW | KLLFAF | VPPCNIAH | GWIAF    | ICSL | LFISG | VAFV | TRF  |
| M.guttatus_1   | FVDAIT | LETS | ESKKVDSI | YLRIR | AKSFW  | HLLLPW | KLLFAF | VPPCNIAH | GWIAF    | ICSL | LFISG | VAFV | TRF  |
| C.sativus      | FVDAIT | LETS | ESKKVDSI | YLRIR | AKSFW  | HLLLPW | KLLFAF | VPPCNIAH | GWIAF    | ICSL | LFISG | VAFV | TRF  |
| G.max          | FVDAIT | LETS | ESKKVDSI | YLRIR | AKSFW  | HLLLPW | KLLFAF | VPPCNIAH | GWIAF    | ICSL | LFISG | VAFV | TRF  |
| M.truncatula   | FVDAIT | LETS | ESKKVDSI | YLRIR | AKSFW  | HLLLPW | KLLFAF | VPPCNIAH | GWIAF    | ICSL | LFISG | VAFV | TRF  |
| A.coerulea     | FVDAIT | LETS | ESKKVDSI | YLRIR | AKSFW  | HLLLPW | KLLFAF | VPPCNIAH | GWIAF    | ICSL | LFISG | VAFV | TRF  |
| V.vinifera     | FVDAIT | LETS | ESKKVDSI | YLRIR | AKSFW  | HLLLPW | KLLFAF | VPPCNIAH | GWIAF    | ICSL | LFISG | VAFV | TRF  |
| E.grandis      | FVDAIT | LETS | ESKKVDSI | YLRIR | AKSFW  | HLLLPW | KLLFAF | VPPCNIAH | GWIAF    | ICSL | LFISG | VAFV | TRF  |
| M.guttatus_2   | FVDAIT | LETS | ESKKVDSI | YLRIR | AKSFW  | HLLLPW | KLLFAF | VPPCNIAH | GWIAF    | ICSL | LFISG | VAFV | TRF  |
| O.sativa_J1    | FVDAIT | LETS | ESKKVDSI | YLRIR | AKSFW  | HLLLPW | KLLFAF | VPPCNIAH | GWIAF    | ICSL | LFISG | VAFV | TRF  |
| O.sativa_I1    | FVDAIT | LETS | ESKKVDSI | YLRIR | AKSFW  | HLLLPW | KLLFAF | VPPCNIAH | GWIAF    | ICSL | LFISG | VAFV | TRF  |
| O.sativa_J2    | FVDAIT | LETS | ESKKVDSI | YLRIR | AKSFW  | HLLLPW | KLLFAF | VPPCNIAH | GWIAF    | ICSL | LFISG | VAFV | TRF  |
| T.aestivum     | FVDAIT | LETS | ESKKVDSI | YLRIR | AKSFW  | HLLLPW | KLLFAF | VPPCNIAH | GWIAF    | ICSL | LFISG | VAFV | TRF  |
| B.distachyon   | FVDAIT | LETS | ESKKVDSI | YLRIR | AKSFW  | HLLLPW | KLLFAF | VPPCNIAH | GWIAF    | ICSL | LFISG | VAFV | TRF  |
| Z.mays         | FVDAIT | LETS | ESKKVDSI | YLRIR | AKSFW  | HLLLPW | KLLFAF | VPPCNIAH | GWIAF    | ICSL | LFISG | VAFV | TRF  |
| S.bicolor      | FVDAIT | LETS | ESKKVDSI | YLRIR | AKSFW  | HLLLPW | KLLFAF | VPPCNIAH | GWIAF    | ICSL | LFISG | VAFV | TRF  |
| S.italica      | FVDAIT | LETS | ESKKVDSI | YLRIR | AKSFW  | HLLLPW | KLLFAF | VPPCNIAH | GWIAF    | ICSL | LFISG | VAFV | TRF  |
| consensus>50   | FvDa   | .les | esrkmdsi | ylr   | .arifw | qlllpw | kllf   | afvppq   | iahgwiaf | icsl | lfisg | ia   | ivtk |

|                |                                                                         |                         |                  |         |     |     |     |
|----------------|-------------------------------------------------------------------------|-------------------------|------------------|---------|-----|-----|-----|
|                | 390                                                                     | 400                     | 410              | 420     | 430 | 440 | 450 |
| A.thaliana     | TDLISCVTGINPYVIAFTALASG                                                 | TSWPDLVASKIAAERQLTADSAT | ANITCSNSVNIYVIGV | PWLINTV |     |     |     |
| A.halleri      | TDLISCVTGINPYVIAFTALASG                                                 | TSWPDLVASKIAAERQLTADSAT | ANITCSNSVNIYVIGV | PWLINTV |     |     |     |
| A.lyrata       | TDLISCVTGINPYVIAFTALAGG                                                 | TSWPDLVASKIAAERQLTADSAT | ANITCSNSVNIYVIGV | PWLINTV |     |     |     |
| C.clementina   | TDIIISCVTGINAYVIAFTALASG                                                | TSWPDLVASKIAAERQLTADSAT | ANITCSNSVNIYVIGV | PWLIDTA |     |     |     |
| R.communis     | TDLISCVTGINAYVIAFTALAACT                                                | TSWPDLVASKIAAERQLTADSAT | ANITCSNSVNIYVIGV | PWLIDTA |     |     |     |
| M.esculenta    | TDLISCVTGINAYVIAFTALASG                                                 | TSWPDLVASKIAAERQLTADSAT | ANITCSNSVNIYVIGV | PWLIDTA |     |     |     |
| P.trichocarpa  | TDLISCVTGINAYVIAFTALASG                                                 | TSWPDLVASKIAAERQLTADSAT | ANITCSNSVNIYVIGV | PWLIDTA |     |     |     |
| P.persica      | TDLISCVTGINPYVIAFTALASG                                                 | TSWPDLVASKIAAERQLTADSAT | ANITCSNSVNIYVIGV | PWLIDTA |     |     |     |
| C.papaya       | TDLVSCVTGINPYVIAFTALACG                                                 | TSWPDLVASKIAAERQLTADSAT | ANITCSNSVNIYVIGV | PWLINTL |     |     |     |
| S.tuberosum    | TDLISCVTGINPYVIAFTALASG                                                 | TSWPDLVASKIAAERQLTADSAT | ANITCSNSVNIYVIGV | PWLINTL |     |     |     |
| S.lycopersicum | TDLISCVTGINPYVIAFTALASG                                                 | TSWPDLVASKIAAERQLTADSAT | ANITCSNSVNIYVIGV | PWLIDTL |     |     |     |
| M.guttatus_1   | TDLISCVTGINAYVIAFTALAACT                                                | TSWPDLVASKIAAERQLTADSAT | ANITCSNSVNIYVIGV | PWLINTM |     |     |     |
| C.sativus      | TDLISCVSGINPYVIAFTALASG                                                 | TSWPDLVASKIAAERQLTADSAT | ANITCSNSVNIYVIGV | PWLIST  |     |     |     |
| G.max          | TDLISCVTGINAYVIAFTALASG                                                 | TSWPDLVASKIAAERQLTADSAT | ANITCSNSVNIYVIGV | PWLIDTL |     |     |     |
| M.truncatula   | TDLISCVTGINAYVIAFTALASG                                                 | TSWPDLVASKIAAERQLTADSAT | ANITCSNSVNIYVIGV | PWLIDTL |     |     |     |
| A.coerulea     | TDLMISCVTGINGYVIAFTALASG                                                | TSWPDLVASKIAAERQLTADSAT | ANITCSNSVNIYVIGV | PWLIDTL |     |     |     |
| V.vinifera     | TDLISCVTGINAYVIAFTALAACT                                                | TSWPDLVASKIAAERQLTADSAT | ANITCSNSVNIYVIGV | PWLINTT |     |     |     |
| E.grandis      | TDLISCVTGINAYVIAFTALACT                                                 | TSWPDLVASKIAAERQLTADSAT | ANITCSNSVNIYVIGV | PWLINTA |     |     |     |
| M.guttatus_2   | TDLISCVTGINAYVIAFTALAACT                                                | TSWPDLVASKIAAERQLTADSAT | ANITCSNSVNIYVIGV | PWLIDTL |     |     |     |
| O.sativa_J1    | TDQISCVTGVSPYVIAFTALAACT                                                | TSWPDLVASKIAAERQLTADSAT | ANITCSNSVNIYVIGV | PWLIDTM |     |     |     |
| O.sativa_I1    | TDQISCVTGVSPYVIAFTALAACT                                                | TSWPDLVASKIAAERQLTADSAT | ANITCSNSVNIYVIGV | PWLIDTM |     |     |     |
| O.sativa_J2    | TDQISCVTGVSPYVIAFTALAACT                                                | TSWPDLVASKIAAERQLTADSAT | ANITCSNSVNIYVIGV | PWLIDTM |     |     |     |
| T.aestivum     | TDQISCVTGLNPYVIAFTALAACT                                                | TSWPDLVASKIAAERQLTADSAT | ANITCSNSVNIYVIGV | PWLINTV |     |     |     |
| B.distachyon   | TDQISCVTGVNLYVIAFTALAACT                                                | TSWPDLVASKIAAERQLTADSAT | ANITCSNSVNIYVIGV | PWLIDTV |     |     |     |
| Z.mays         | TDQISCVTGVSPYVIAFTALAACT                                                | TSWPDLVASKIAAERQLTADSAT | ANITCSNSVNIYVIGV | PWLIDTV |     |     |     |
| S.bicolor      | TDQISCVTGVSPYVIAFTALAACT                                                | TSWPDLVASKIAAERQLTADSAT | ANITCSNSVNIYVIGV | PWLIDTV |     |     |     |
| S.italica      | TDQISCVTGVSPYVIAFTALAACT                                                | TSWPDLVASKIAAERQLTADSAT | ANITCSNSVNIYVIGV | PWLIDTV |     |     |     |
| consensus>50   | TDLISCVtGinpY!IAfTALA.GtSWPDLVASKIAaERQ.TADSAITaNitCSNSVNIYvGIG!PWLIDT. |                         |                  |         |     |     |     |

|                |                                                                        |                  |                         |     |     |     |     |
|----------------|------------------------------------------------------------------------|------------------|-------------------------|-----|-----|-----|-----|
|                | 460                                                                    | 470              | 480                     | 490 | 500 | 510 | 520 |
| A.thaliana     | YNFYAYREPLYIENAKGLSFSLLIFFATS                                          | VGCIvLVLRRLIIGAE | LGPPRLWAWLTSAYFMMLWVVFV |     |     |     |     |
| A.halleri      | YNFYAYREPLYIENAKGLSFSLLIFFATS                                          | VGCIvLVLRRLIIGAE | LGPPRLWAWLTSAYFMMLWVVFV |     |     |     |     |
| A.lyrata       | YNFYAYREPLYIENAKGLSFSLLIFFATS                                          | VGCIvLVLRRLIIGAE | LGPPRLWAWLTSAYFMMLWVVFV |     |     |     |     |
| C.clementina   | YNFYAYREPLYIENAKGLSFSLLIFFATS                                          | VGCIvLVLRRLIIGAE | LGPPRLWAWLTSAYFMMLWVVFV |     |     |     |     |
| R.communis     | YNFYAYREPLYIENAKGLSFSLLIFFATS                                          | VGCIvLVLRRLIIGAE | LGPPRLWAWLTSAYFMMLWVVFV |     |     |     |     |
| M.esculenta    | YNFYAYREPLYIENAKGLSFSLLIFFATS                                          | VGCIvLVLRRLIIGAE | LGPPRLWAWLTSAYFMMLWVVFV |     |     |     |     |
| P.trichocarpa  | YNFYAYREPLYIENAKGLSFSLLIFFATS                                          | VGCIvLVLRRLIIGAE | LGPPRLWAWLTSAYFMMLWVVFV |     |     |     |     |
| P.persica      | YNFYAYREPLYIENAKGLSFSLLIFFATS                                          | VGCIvLVLRRLIIGAE | LGPPRLWAWLTSAYFMMLWVVFV |     |     |     |     |
| C.papaya       | YNFYAYREPLYIENAKGLSFSLLIFFATS                                          | VGCIvLVLRRLIIGAE | LGPPRLWAWLTSAYFMMLWVVFV |     |     |     |     |
| S.tuberosum    | YNFYAYREPLYIENAKGLSFSLLIFFATS                                          | VGCIvLVLRRLIIGAE | LGPPRLWAWLTSAYFMMLWVVFV |     |     |     |     |
| S.lycopersicum | YNFYAYREPLYIENAKGLSFSLLIFFATS                                          | VGCIvLVLRRLIIGAE | LGPPRLWAWLTSAYFMMLWVVFV |     |     |     |     |
| M.guttatus_1   | YNFYAYREPLYIENAKGLSFSLLIFFATS                                          | VGCIvLVLRRLIIGAE | LGPPRLWAWLTSAYFMMLWVVFV |     |     |     |     |
| C.sativus      | YNFYAYREPLYIENAKGLSFSLLIFFATS                                          | VGCIvLVLRRLIIGAE | LGPPRLWAWLTSAYFMMLWVVFV |     |     |     |     |
| G.max          | YNFYAYREPLYIENAKGLSFSLLIFFATS                                          | VGCIvLVLRRLIIGAE | LGPPRLWAWLTSAYFMMLWVVFV |     |     |     |     |
| M.truncatula   | YNFYAYREPLYIENAKGLSFSLLIFFATS                                          | VGCIvLVLRRLIIGAE | LGPPRLWAWLTSAYFMMLWVVFV |     |     |     |     |
| A.coerulea     | YNFYAYREPLYIENAKGLSFSLLIFFATS                                          | VGCIvLVLRRLIIGAE | LGPPRLWAWLTSAYFMMLWVVFV |     |     |     |     |
| V.vinifera     | YNFYAYREPLYIENAKGLSFSLLIFFATS                                          | VGCIvLVLRRLIIGAE | LGPPRLWAWLTSAYFMMLWVVFV |     |     |     |     |
| E.grandis      | YNFYAYREPLYIENAKGLSFSLLIFFATS                                          | VGCIvLVLRRLIIGAE | LGPPRLWAWLTSAYFMMLWVVFV |     |     |     |     |
| M.guttatus_2   | YNFYAYREPLYIENAKGLSFSLLIFFATS                                          | VGCIvLVLRRLIIGAE | LGPPRLWAWLTSAYFMMLWVVFV |     |     |     |     |
| O.sativa_J1    | YNFYAYREPLYIENAKGLSFSLLIFFATS                                          | VGCIvLVLRRLIIGAE | LGPPRLWAWLTSAYFMMLWVVFV |     |     |     |     |
| O.sativa_I1    | YNFYAYREPLYIENAKGLSFSLLIFFATS                                          | VGCIvLVLRRLIIGAE | LGPPRLWAWLTSAYFMMLWVVFV |     |     |     |     |
| O.sativa_J2    | YNFYAYREPLYIENAKGLSFSLLIFFATS                                          | VGCIvLVLRRLIIGAE | LGPPRLWAWLTSAYFMMLWVVFV |     |     |     |     |
| T.aestivum     | YNFYAYREPLYIENAKGLSFSLLIFFATS                                          | VGCIvLVLRRLIIGAE | LGPPRLWAWLTSAYFMMLWVVFV |     |     |     |     |
| B.distachyon   | YNFYAYREPLYIENAKGLSFSLLIFFATS                                          | VGCIvLVLRRLIIGAE | LGPPRLWAWLTSAYFMMLWVVFV |     |     |     |     |
| Z.mays         | YNFYAYREPLYIENAKGLSFSLLIFFATS                                          | VGCIvLVLRRLIIGAE | LGPPRLWAWLTSAYFMMLWVVFV |     |     |     |     |
| S.bicolor      | YNFYAYREPLYIENAKGLSFSLLIFFATS                                          | VGCIvLVLRRLIIGAE | LGPPRLWAWLTSAYFMMLWVVFV |     |     |     |     |
| S.italica      | YNFYAYREPLYIENAKGLSFSLLIFFATS                                          | VGCIvLVLRRLIIGAE | LGPPRLWAWLTSAYFMMLWVVFV |     |     |     |     |
| consensus>50   | YN%faY.ePL.!e#A.GLSFSLL!FFaTSvgCI.vLVLRRLtlgAELGGPrLWawvTsv%fmLlwV!Fvv |                  |                         |     |     |     |     |

|                |            |
|----------------|------------|
|                | 530        |
| A.thaliana     | ISSLKVSGVI |
| A.halleri      | ISSLKVSGVI |
| A.lyrata       | ISSLKVSGII |
| C.clementina   | ISSLKVSGII |
| R.communis     | ISSLRVSGII |
| M.esculenta    | ISSLRVSGFI |
| P.trichocarpa  | ISSLRVSGII |
| P.persica      | ISSLKVSGII |
| C.papaya       | ISSLRVSGII |
| S.tuberosum    | ISSLRVSGII |
| S.lycopersicum | ISSLRVSGII |
| M.guttatus_1   | ISSLRVSGFI |
| C.sativus      | ISSLKVSDII |
| G.max          | ISSLKVSGFI |
| M.truncatula   | ISSLKVSGFI |
| A.coerulea     | ISSLKVSDII |
| V.vinifera     | ISSLKVIYGI |
| E.grandis      | ISSLKVSGII |
| M.guttatus_2   | ISSLQVSNII |
| O.sativa_J1    | ISSLKISGVI |
| O.sativa_I1    | ISSLKISGVI |
| O.sativa_J2    | ISSLRISGVI |
| T.aestivum     | ISSLRVSGVI |
| B.distachyon   | ISSLRVSGVI |
| Z.mays         | FSSLRVSGVI |
| S.bicolor      | FSSLRVSGVI |
| S.italica      | FSSLKVSGII |
| consensus>50   | ISSLk!sgII |
