# Supplementary material for: Phylogeny and a structural model of plant MHX transporters
Source: PubMed Central journal article supplement (PMC3679957; doi:10.1186/1471-2229-13-75), 2013-05-02
Supplement: 1471-2229-13-75-S9.pdf [file 1471-2229-13-75-S9.pdf]

**Additional file 9. Alignment of MHX and NCX proteins**

The file presents the alignment of all currently identified MHX proteins and the NCX proteins that were utilized as markers or identified in this work (excluding CrNCX). See the legends of Additional file 5 for details of sequence alignment and color annotation.





|                      | 60                                                           | 70     | 80     | 90            | 100                |                      |
|----------------------|--------------------------------------------------------------|--------|--------|---------------|--------------------|----------------------|
| A.thaliana           | FICLSAITARFFK..                                              | SMENVV | KHSR   | KVVT.IDPI     | TKAEV.....         | ITYKKVWNFTIADISLLA   |
| A.halleri            | FICLSAITARFFK..                                              | SMENVV | KHSR   | KVVA.IDPI     | TKAEI.....         | ITYKKVWNFTIADISLLA   |
| A.lyrata             | FICLSAITARFFK..                                              | SMENVV | KHSR   | KVVA.VDPI     | TKAEV.....         | ITYKKVWNFTIADISLLA   |
| C.satvua             | FVGLSAITARFFR..                                              | SMENVV | KHSR   | KVVE.IDPH     | TNTEI.....         | IRYEKVVNFYTIADISLLA  |
| C.clementina         | FICLSAITARFFR..                                              | SMENVV | KHSR   | KVVE.IDPV     | TKAEV.....         | IRYEKVVNFYTIADISLLA  |
| R.communis           | FICLSAITARFFR..                                              | SMENVV | KHSR   | KVVE.IDPV     | TNTEV.....         | IRYEKVVNFYTIADISLLA  |
| M.esculenta          | FFGLSAITARFFR..                                              | SMENVV | KHSR   | KVVE.VDPT     | TNTEV.....         | IRYEKVVNFYTIADISLLA  |
| P.trichocarpa        | FICLSAITARFFR..                                              | SMENVV | KHSR   | KVVE.IDPY     | TNAEV.....         | IRYEKVVNFYTIADISLLA  |
| P.persica            | FVGLSAITARFFQ..                                              | SME    | SVVSH  | TRKVV.DINP    | TGAEI.....         | IRYEKVVNFYTIADISLLA  |
| C.papaya             | FICLSAITARFFR..                                              | SMENVV | KHSR   | KVVE.IDPI     | TNQEI.....         | TRHEKVVNFYTIADISLLA  |
| A.coerulea           | FFGLSAITARFFR..                                              | SMENVV | KHSR   | KVVE.IDHN     | TNTEV.....         | IRHEKVVNFYTIADITLLA  |
| V.vinifera           | FICLSAITARFFQ..                                              | SMENVV | KHKR   | KVVK.IDPRS    | NTNEV.....         | IRHEKVVNFYTIADITLLA  |
| S.tuberosum          | FICLSAITARFFR..                                              | SME    | SVVKHS | RVTET.IDPL    | TNTKI.....         | VKNEKVVNFYTIADITLLA  |
| S.lycopersicum       | FICLSAITARFFR..                                              | SME    | SVVKHS | RVTET.IDPL    | TNTKA.....         | VKNEKVVNFYTIADITLLA  |
| M.guttatus_1         | FICLSAITARFFQ..                                              | SMENVV | KHSR   | KVVE.IDPC     | TNTKT.....         | VRHEKVVNFYTIADITLLA  |
| M.guttatus_2         | FVGLSAITARFFR..                                              | SMENVV | KHSR   | RAVEE.IDPL    | TNTKV.....         | IRYEKVVNFYTIADITLLA  |
| G.max                | FICLSAITARFFQ..                                              | SMENVV | KHSR   | KVVE.VDPV     | TKTET.....         | IRHEKVVNFYTIADISLLA  |
| M.truncatula         | FICLSAITARFFQ..                                              | SMENVV | KHSR   | KVVE.IDPV     | TKAEV.....         | IRHEKVVNFYTIADISLLA  |
| E.grandis            | FICLSAITARFFS..                                              | SMENVV | KHSR   | KVVE.IDPV     | TNSKV.....         | VRQEKVVNFYTIADITLLA  |
| S.italica            | FICLSAITARFFK..                                              | SME    | QIMKHS | REVV.VDPH     | TNAPV.....         | VQEKVVNFYTIADIA LLA  |
| Z.mays               | FVGLSAITARFFK..                                              | SME    | QIMKHS | REVV.VDPR     | TGAPV.....         | VRDKVVNFYTIADIA LLA  |
| S.bicolor            | FICLSAITARFFK..                                              | SME    | QIMKHS | REVV.VDPR     | TKEPV.....         | VRHEKVVNFYTIADIA LLA |
| T.aestivum           | FICLSAITARFFK..                                              | SME    | SITNHS | REVV.VDTE     | TNTPI.....         | VKHEKVVNFYTIADIA LLA |
| B.distachyon         | FICLSAITARFFK..                                              | SME    | SITNHS | REVV.VDTE     | TNTPI.....         | VKHEKVVNFYTIADIA LLA |
| O.sativa_J1          | FICLSAITARFFK..                                              | SME    | SITNHS | REVV.VDTE     | TNATI.....         | VKHEKVVNFYTIADVA LLA |
| O.sativa_J1          | FICLSAITARFFK..                                              | SME    | SITNHS | REVV.VDTE     | TNATI.....         | VKHEKVVNFYTIADVA LLA |
| O.sativa_J2          | FICLSAITARFFK..                                              | SME    | SITNHS | REVV.VDTE     | TNATI.....         | VKHEKVVNFYTIADVA LLA |
| S.moellendorffii_1   | FVGLATITNLFMQAGGSAMGTIANRTRKIVRHNDPESGSEE.....               | IVRHSR | KSVHR  | DPITGLRI..... | FSEIRIWNPFVADITLLA |                      |
| P.patens_1           | FVGLATITNLFMQAGGSAMGTIANRTRKIVRHNDPESGSEE.....               | IVRHSR | KSVHR  | DPITGLRI..... | FSEIRIWNPFVADITLLA |                      |
| P.patens_2           | FVGLATITNLFMQAGGSAMGTIANRTRKIVRHNDPESGSEE.....               | IVRHSR | KSVHR  | DPITGLRI..... | FSEIRIWNPFVADITLLA |                      |
| C.reinhardtii        | FAGVAIASDMFMDGIMNICAITKIYKRNK.EKGETIYV.....                  | KEPV   | WNV    | VANITLLA      |                    |                      |
| C.intestinalis       | FICGVAIGSDVFMSTIEVITSKKRTIILWDEELGENTKK.....                 | EVL    | VWNE   | TVANLTLA      |                    |                      |
| B.floridae           | FICGITIGSDVFMCSIEVITSKKRIVRWDEERQETVER.....                  | EVL    | LWNE   | TIANLTLA      |                    |                      |
| T.adhaerens_3        | FVGVAIMSDVFMGAIEVITSKKRTVITYDRETEGQATK.....                  | EVL    | IWNE   | TVANLTLA      |                    |                      |
| N.vectensis_2        | FLGIAIVADIFMCSIEVITSKKRIVRYDHEKGESVEI.....                   | EVL    | VWNE   | TVANLTLA      |                    |                      |
| H.sapiens_NCX1.1     | FLGVSIIDRFMSSIEVITSQEKETIK.KPNGETTKTT.....                   | VRI    | WNE    | TVANLTLA      |                    |                      |
| P.troglodytes_NCX1.1 | FLGVSIIDRFMSSIEVITSQEKETIK.KPNGETTKTT.....                   | VRI    | WNE    | TVANLTLA      |                    |                      |
| C.familiaris_NCX1.1  | FLGVSIIDRFMSSIEVITSQEKETIK.KPNGETTKTT.....                   | VRI    | WNE    | TVANLTLA      |                    |                      |
| F.catus_NCX1.1       | FLGVSIIDRFMSSIEVITSQEKETIK.KPNGETTKTT.....                   | VRI    | WNE    | TVANLTLA      |                    |                      |
| C.porcullus_NCX1.1   | FLGVSIIDRFMSSIEVITSQEKETIK.KPNGETTKTT.....                   | VRI    | WNE    | TVANLTLA      |                    |                      |
| B.taurus_NCX1.1      | FLGVSIIDRFMSSIEVITSQEKETIK.KPNGETTKTT.....                   | VRI    | WNE    | TVANLTLA      |                    |                      |
| R.norvegicus_NCX1.1  | FLGVSIIDRFMSSIEVITSQEKETIK.KPNGETTKTT.....                   | VRI    | WNE    | TVANLTLA      |                    |                      |
| M.musculus_NCX1.1    | FLGVSIIDRFMSSIEVITSQEKETIK.KPNGETTKTT.....                   | VRI    | WNE    | TVANLTLA      |                    |                      |
| M.mulatta_NCX1.3     | FLGVSIIDRFMSSIEVITSQEKETIK.KPNGETTKTT.....                   | VRI    | WNE    | TVANLTLA      |                    |                      |
| O.cuniculus_NCX1.2   | FLGVSIIDRFMSSIEVITSQEKETIK.KPNGETTKTT.....                   | VRI    | WNE    | TVANLTLA      |                    |                      |
| S.tropicalis_NCX1    | FLGVSIIDRFMSSIEVITSQEKETIK.KPNGETTKTT.....                   | VRI    | WNE    | TVANLTLA      |                    |                      |
| O.mossambicus_NCX1.1 | FLGVSIIDRFMASIEVITSQERETIK.KPNGETITTT.....                   | VRI    | WNE    | TVANLTLA      |                    |                      |
| O.mykiss_NCX1        | FLGVSIIDRFMASIEVITSQERETIK.KPNGETITTT.....                   | VRI    | WNE    | TVANLTLA      |                    |                      |
| D.rerio_NCX1a        | FLGVSIIDRFMASIEVITSQERETIK.KPNGETITTT.....                   | VRI    | WNE    | TVANLTLA      |                    |                      |
| H.sapiens_NCX3.3     | FLGVSIIDRFMASIEVITSQERETIK.KPNGETITTT.....                   | IRV    | WNE    | TVANLTLA      |                    |                      |
| R.norvegicus_NCX3.3  | FLGVSIIDRFMASIEVITSQERETIK.KPNGETITTT.....                   | IRV    | WNE    | TVANLTLA      |                    |                      |
| M.musculus_NCX3.1    | FLGVSIIDRFMASIEVITSQERETIK.KPNGETITTT.....                   | IRV    | WNE    | TVANLTLA      |                    |                      |
| G.gallus_NCX3        | FLGVSIIDRFMASIEVITSQERETIK.KPNGETITTT.....                   | IRV    | WNE    | TVANLTLA      |                    |                      |
| D.rerio_NCX4a        | FLGMSIIDRFMSSIEVITSQEKETIK.KPNGETITTT.....                   | VRI    | WNE    | TVANLTLA      |                    |                      |
| T.nigroviridis_NCX4a | FLGMSIIDRFMSSIEVITSQEKETIK.KPNGETITTT.....                   | VRI    | WNE    | TVANLTLA      |                    |                      |
| H.sapiens_NCX2.1     | FLGVSIIDRFMAAIEVITSKEKETIT.KANGETSVGT.....                   | VRI    | WNE    | TVANLTLA      |                    |                      |
| R.norvegicus_NCX2.1  | FLGVSIIDRFMAAIEVITSKEKETIT.KANGETSVGT.....                   | VRI    | WNE    | TVANLTLA      |                    |                      |
| M.musculus_NCX2.1    | FLGVSIIDRFMAAIEVITSKEKETIT.KANGETSVGT.....                   | VRI    | WNE    | TVANLTLA      |                    |                      |
| S.kowalevskii_3      | FLGVSIIDRFMAAIEVITSKEKETIT.KANGETSVGT.....                   | VRI    | WNE    | TVANLTLA      |                    |                      |
| T.adhaerens_2        | FLGVSIIDRFMSAIEIITSKERFIVK.MSNGEYKRIS.....                   | VRV    | WNE    | TVANLTLA      |                    |                      |
| L.opalescens_NCX     | FLGVSIIDRFMAAIEVITSKEKDVVVK.KPDGTTIVVN.....                  | VRI    | WNE    | TVANLTLA      |                    |                      |
| A.mellifera_NCX      | FLGVSIIDRFMAAIEVITSKEKELVVR.RQKPEQIVV.....                   | VRV    | WNE    | TVANLTLA      |                    |                      |
| D.melanogaster_NCX   | FVGVSIIDRFMAAIEAITSIERAVVVK.GPNTKQVMH.....                   | VRI    | WNE    | TVANLTLA      |                    |                      |
| H.magnipapillata     | FLGISIISDIFMSSIEIITSKEKELVLRDRVTKGKHSVT.....                 | VKI    | WNE    | TVANLTLA      |                    |                      |
| C.elegans_NCX1       | FRGVSIIDRFMASIEVITSQKSVKMK.KITGEHFTIM.....                   | VRV    | WNE    | TVANLTLA      |                    |                      |
| C.briggsae_NCX1      | FRGVSIIDRFMASIEVITSQKSVKMK.KITGEHFTIM.....                   | VRV    | WNE    | TVANLTLA      |                    |                      |
| C.elegans_NCX2       | FLGISIVADRFMSSIEVITSMERTIVVK.RPGLDPMVAVQ.....                | VRI    | WNE    | TVANLTLA      |                    |                      |
| C.briggsae_NCX2      | FLGISIVADRFMSSIEVITSMERTIVVK.RPGLDPMVAVQ.....                | VRI    | WNE    | TVANLTLA      |                    |                      |
| T.spiralis           | FVGVAILADSFMCVERITSTKRTLKLQTAIDEEETGSVLEQYQ.....             | EVL    | WNE    | TVANLTLA      |                    |                      |
| M.brevicollis_1      | FAGVGIIITDVFMEDIAIEVITSRERHVMV.DGI.....                      | ETV    | LWNE   | PVANLTLA      |                    |                      |
| Salpingoeca          | FSGIGIITDVFMEDIAIEVITSRERHVMV.DGI.....                       | VVH    | VQVNE  | PVANLTLA      |                    |                      |
| S.kowalevskii_1      | FLGVSIIDRFMCSIEVITSKTKTNIANPKAPGGTTEE.....                   | IKV    | RVNS   | TVANLTLA      |                    |                      |
| S.kowalevskii_2      | LYGVSIITGIFMSSIEVITSKTKTNIANPKAPGGTQK.....                   | LK     | RVNS   | TVANLTLA      |                    |                      |
| T.adhaerens_1        | FLGVAIIDRFMCAIEVITSQTRRKIKISDKDGMNKE.....                    | VE     | RVND   | TVANLTLA      |                    |                      |
| D.pulex_1            | FTGVAIIDRFMGAIEKITSITRKRIVFINHRSQEPEV.....                   | IE     | RVND   | TVANLTLA      |                    |                      |
| P.humanus_corporis   | FVGVSVVTDIFMGAIVVITITSQTHVYLLGKFKKPESESALNVTATSTHQLDFIE..... | VRV    | WNE    | TVANLTLA      |                    |                      |
| O.dioica             | FLGVAIIVADIFMVSIEVITSREKHTIILVDGQPEKQ.....                   | K      | RVFN   | NATVANLTLA    |                    |                      |
| A.pisum              | LLGISIVADVFMTAIDKITSHTKVKVYLAKELKPNGS.....                   | QPE    | VI     | RVWNE         | TVANLTLA           |                      |
| P.marinus            | FVGVAIISDFMGAIEKITSKTKRRLTIQGETK.....                        | LVT    | RVWNE  | TVANLTLA      |                    |                      |
| A.anophagefferens_1  | FLGVSIIDVFMAAIETITSKKEKVPGLTD.....                           | V      | WNA    | TVANLTLA      |                    |                      |
| E.huxleyi            | FLGVAIIVADIFMLGIEIITSQEQAKTVVVDGRRK.....                     | VYS    | LK     | WNA           | TVANLTLA           |                      |
| consensus>50         | f.Gvsii.dr&m..ievits.k.i.....t.....                          |        |        |               | vrvwNet!a#ltLma    |                      |

|                      | 110 | 120 | 130 | 140 | 150 | 160 | 170 |   |   |   |   |   |   |   |   |   |     |   |     |     |   |   |     |   |   |     |     |   |   |   |   |   |   |   |   |   |   |   |   |   |   |   |   |   |   |   |   |   |   |   |   |   |   |   |   |   |   |   |   |   |   |   |   |   |   |   |   |
|----------------------|-----|-----|-----|-----|-----|-----|-----|---|---|---|---|---|---|---|---|---|-----|---|-----|-----|---|---|-----|---|---|-----|-----|---|---|---|---|---|---|---|---|---|---|---|---|---|---|---|---|---|---|---|---|---|---|---|---|---|---|---|---|---|---|---|---|---|---|---|---|---|---|---|---|
| A.thaliana           | F   | G   | T   | S   | F   | P   | Q   | I | S | A | T | I | D | A | I | R | N   | M | G   | ... | E | R | Y   | A | G | G   | L   | G | P | G | T | L | V | G | S | A | A | F | D | L | F | F | P | I | H | A | V | C | V | V | P | K | A | G | E | L | K | K | I | S | D | L | G | V | W | L | V |
| A.halleri            | F   | G   | T   | S   | F   | P   | Q   | I | S | A | T | I | D | A | I | R | N   | I | G   | ... | E | R | Y   | A | G | G   | L   | G | P | G | T | L | V | G | S | A | A | F | D | L | F | F | I | H | A | V | C | V | V | P | K | A | G | E | L | K | K | I | S | D | L | G | V | W | L | V |   |
| A.lyrata             | F   | G   | T   | S   | F   | P   | Q   | I | S | A | T | I | D | A | I | R | N   | I | G   | ... | E | R | Y   | A | G | G   | L   | G | P | G | T | L | V | G | S | A | A | F | D | L | F | F | I | H | A | V | C | V | V | P | K | A | G | E | L | K | K | I | S | D | L | G | V | W | L | V |   |
| C.sativus            | F   | G   | T   | S   | F   | P   | Q   | I | S | A | T | I | D | A | I | R | N   | I | G   | ... | N | L | Y   | A | G | G   | L   | G | P | G | T | L | V | G | S | A | A | F | D | L | F | F | I | H | A | V | C | V | V | P | K | A | G | E | L | K | K | I | S | D | L | G | V | W | L | V |   |
| C.clementina         | F   | G   | T   | S   | F   | P   | Q   | I | S | A | T | I | D | A | I | R | S   | I | G   | ... | N | L | Y   | A | G | G   | L   | G | P | G | T | L | V | G | S | A | A | F | D | L | F | F | I | H | A | V | C | V | V | P | K | A | G | E | L | K | K | I | S | D | L | G | V | W | L | V |   |
| R.communis           | F   | G   | T   | S   | F   | P   | Q   | I | S | A | T | I | D | A | I | R | N   | I | G   | ... | N | L | Y   | A | G | G   | L   | G | P | G | T | L | V | G | S | A | A | F | D | L | F | F | I | H | A | V | C | V | V | P | K | A | G | E | L | K | K | I | S | D | L | G | V | W | L | V |   |
| M.esculenta          | F   | G   | T   | S   | F   | P   | Q   | I | S | A | T | I | D | A | I | R | N   | I | G   | ... | N | L | Y   | A | G | G   | L   | G | P | G | T | L | V | G | S | A | A | F | D | L | F | F | I | H | A | V | C | V | V | P | K | A | G | E | L | K | K | I | S | D | L | G | V | W | L | V |   |
| P.trichocarpa        | F   | G   | T   | S   | F   | P   | Q   | I | S | A | T | I | D | A | I | Q | N   | I | G   | ... | N | L | Y   | A | G | G   | M   | G | P | G | T | L | V | G | S | A | A | F | D | L | F | F | I | H | A | V | C | V | V | P | K | A | G | E | L | K | K | I | S | D | L | G | V | W | L | V |   |
| P.persica            | F   | G   | T   | S   | F   | P   | Q   | I | S | A | T | I | D | A | I | R | N   | L | G   | ... | N | L | Y   | A | G | G   | L   | G | P | G | T | L | V | G | S | A | A | F | D | L | F | F | I | H | A | V | C | V | V | P | R | A | G | E | L | K | K | I | S | D | L | G | V | W | L | V |   |
| C.papaya             | F   | G   | T   | S   | F   | P   | Q   | I | S | A | T | I | D | A | I | R | N   | L | G   | ... | N | L | N   | A | G | L   | G   | P | G | T | L | V | G | S | A | A | F | D | L | F | F | I | H | A | V | C | V | V | P | K | G | E | M | K | I | S | D | L | G | V | W | L | V |   |   |   |   |
| A.coerulea           | F   | G   | T   | S   | F   | P   | Q   | I | S | A | T | I | D | A | I | R | N   | L | G   | ... | Q | L | Y   | A | G | L   | G   | P | G | T | L | V | G | S | A | A | F | D | L | F | F | I | H | A | V | C | V | V | P | K | A | G | E | L | K | K | I | S | D | L | G | V | W | L | V |   |   |
| V.vinifera           | F   | G   | T   | S   | F   | P   | Q   | I | S | A | I | D | S | I | Q | N | L   | G | ... | S   | R | Y | A   | G | L | G   | P   | G | T | L | V | G | S | A | A | F | D | L | F | F | I | H | A | V | C | V | V | P | K | A | G | E | L | K | K | I | S | D | L | G | V | W | L | V |   |   |   |
| S.tuberosum          | F   | G   | T   | S   | F   | P   | Q   | I | S | A | T | I | D | A | I | R | N   | I | G   | ... | K | L | Y   | A | G | L   | G   | P | G | T | L | V | G | S | A | A | F | D | L | F | F | I | H | A | V | C | V | V | P | K | A | G | E | L | K | K | I | S | D | L | G | V | W | L | V |   |   |
| S.lycopersicum       | F   | G   | T   | S   | F   | P   | Q   | I | S | A | T | I | D | A | I | R | N   | I | G   | ... | K | L | Y   | A | G | L   | G   | P | G | T | L | V | G | S | A | A | F | D | L | F | F | I | H | A | V | C | V | V | P | K | A | G | E | L | K | K | I | S | D | L | G | V | W | L | V |   |   |
| M.guttatus_1         | F   | G   | T   | S   | F   | P   | Q   | I | S | A | T | I | D | A | I | R | N   | L | G   | ... | S | L | Y   | A | G | L   | G   | P | G | T | L | V | G | S | A | A | F | D | L | F | F | I | H | A | V | C | V | V | P | K | A | G | E | L | K | K | I | S | D | L | G | V | W | L | V |   |   |
| M.guttatus_2         | F   | G   | T   | S   | F   | P   | Q   | I | S | A | T | I | D | A | I | R | N   | L | G   | ... | S | L | T   | A | G | L   | G   | P | G | T | L | V | G | S | A | A | F | D | L | F | F | I | H | A | V | C | V | V | P | K | A | G | E | L | K | K | I | S | D | L | G | V | W | L | V |   |   |
| G.max                | F   | G   | T   | S   | F   | P   | Q   | I | S | A | T | I | D | A | I | Q | N   | I | G   | ... | S | L | T   | A | G | L   | G   | P | G | T | L | V | G | S | A | A | F | D | L | F | F | I | H | A | V | C | V | V | P | K | A | G | E | L | K | K | I | S | D | L | G | V | W | L | V |   |   |
| M.truncatula         | F   | G   | T   | S   | F   | P   | Q   | I | S | A | T | I | D | A | I | R | N   | L | G   | ... | D | L | Y   | A | G | L   | G   | P | G | T | L | V | G | S | A | A | F | D | L | F | F | I | H | A | V | C | V | I | P | K | A | G | E | L | K | K | I | S | D | L | G | V | W | L | V |   |   |
| E.grandis            | F   | G   | T   | S   | F   | P   | Q   | I | S | A | T | I | D | A | I | R | N   | L | G   | ... | E | L | Y   | A | G | L   | G   | P | G | T | L | V | G | S | A | A | F | D | L | F | F | I | H | A | V | C | V | V | P | K | G | E | L | K | K | I | S | D | L | A | V | W | L | V |   |   |   |
| S.italica            | F   | G   | T   | S   | F   | P   | Q   | I | S | A | T | I | D | A | I | R | N   | L | G   | ... | Q | L | T   | A | G | L   | G   | P | G | T | L | V | G | S | A | A | F | D | M | F | F | I | H | A | V | C | V | I | M | P | K | A | G | S | K | K | I | S | D | L | G | V | W | L | V |   |   |
| Z.mays               | F   | G   | T   | S   | F   | P   | Q   | I | S | A | T | I | D | A | I | R | N   | L | G   | ... | Q | L | T   | A | G | L   | G   | P | G | T | L | V | G | S | A | A | F | D | L | F | F | I | H | A | V | C | V | L | M | P | R | A | G | S | K | K | I | S | D | L | G | V | W | L | V |   |   |
| S.bicolor            | F   | G   | T   | S   | F   | P   | Q   | I | S | A | I | D | A | I | R | N | L   | G | ... | Q   | L | T | A   | G | L | G   | P   | G | T | L | V | G | S | A | A | F | D | L | F | F | I | H | A | V | C | V | M | P | R | A | G | S | K | K | I | S | D | L | G | V | W | L | V |   |   |   |   |
| T.aestivum           | F   | G   | T   | S   | F   | P   | Q   | I | S | A | T | I | D | A | I | R | N   | L | G   | ... | Q | L | T   | A | G | L   | G   | P | G | T | L | V | G | S | A | A | F | D | L | F | F | I | H | A | V | C | V | M | P | R | A | G | S | M | K | I | S | D | L | G | V | W | L | V |   |   |   |
| B.distachyon         | F   | G   | T   | S   | F   | P   | Q   | I | S | A | T | I | D | A | I | R | N   | L | G   | ... | Q | L | T   | A | G | L   | G   | P | G | T | L | V | G | S | A | A | F | D | L | F | F | I | H | A | V | C | V | I | M | P | R | A | G | S | M | K | K | I | S | D | L | G | V | W | L | V |   |
| O.sativa_J1          | F   | G   | T   | S   | F   | P   | Q   | I | S | A | T | I | D | A | I | R | N   | L | G   | ... | Q | L | T   | A | G | L   | G   | P | G | T | L | V | G | S | A | A | F | D | L | F | F | I | H | A | V | C | V | M | P | R | A | G | S | K | K | I | S | D | L | G | V | W | L | V |   |   |   |
| O.sativa_I1          | F   | G   | T   | S   | F   | P   | Q   | I | S | A | T | I | D | A | I | R | N   | L | G   | ... | Q | L | T   | A | G | L   | G   | P | G | T | L | V | G | S | A | A | F | D | L | F | F | I | H | A | V | C | V | M | P | R | A | G | S | K | K | I | S | D | L | G | V | W | L | V |   |   |   |
| O.sativa_J2          | F   | G   | T   | S   | F   | P   | Q   | I | S | A | T | I | D | A | I | R | N   | L | G   | ... | Q | L | T   | A | G | L   | G   | P | G | T | L | V | G | S | A | A | F | D | L | F | F | I | H | A | V | C | V | M | P | R | A | G | S | K | K | I | S | D | L | G | V | W | L | V |   |   |   |
| S.moellendorffii_1   | L   | G   | T   | C   | A   | P   | Q   | V | S | L | A | I | D | A | F | Q | H   | I | G   | ... | Q | T | S   | K | L | A   | G   | T | L | L | G | S | T | A | F | N | L | F | L | I | L | A | V | C | V | L | P | K | R | F | T | K | S | I | R | N | V | G | V | I | I |   |   |   |   |   |   |
| P.patens_1           | L   | G   | T   | S   | A   | P   | Q   | I | S | I | I | D | A | I | Q | Q | I   | G | ... | Q   | K | T | N   | A | G | L   | G   | P | G | T | L | V | G | S | A | A | F | N | L | Y | L | A | V | C | V | L | P | K | A | G | S | V | K | R | I | S | N | V | G | V | I | I |   |   |   |   |   |
| P.patens_2           | L   | G   | T   | S   | A   | P   | Q   | I | S | I | I | D | A | I | F | Q | Q   | L | G   | ... | Q | K | T   | E | A | G   | L   | G | P | G | T | L | V | G | S | A | A | F | N | L | Y | I | L | A | V | C | V | L | P | K | A | G | S | T | K | H | I | S | I | G | V | I | I |   |   |   |   |
| C.reinhardtii        | L   | G   | T   | S   | S   | P   | E   | I | M | S | L | V | E | A | L | L | T   | L | G   | K   | P | A | ... | E | L | C   | P   | S | C | I | A | G | S | A | A | Y | N | F | L | I | S | A | V | C | T | L | A | G | D | G | Q | F | K | I | S | Q | L | R | V | V | V |   |   |   |   |   |   |
| C.intestinalis       | L   | G   | S   | S   | A   | P   | E   | I | L | L | A | T | V | E | T | I | N   | E | I   | L   | S | G | N   | A | K | G   | G   | L | G | F | Y | T | V | G | S | A | A | F | N | L | L | V | I | T | G | I | I | S | V | P | S | H | K | S | I | R | E | L | G | V | F | I | L |   |   |   |   |
| B.floridae           | L   | G   | S   | S   | A   | P   | E   | I | M | N | I | E | A | V | K | E | L   | G | N   | P   | P | E | ... | G | L | G   | P   | F | T | I | V | G | S | A | A | F | N | L | L | V | I | N | A | I | C | V | A | S | V | S | P | E | I | K | A | V | R | E | F | G | V | F | I |   |   |   |   |
| T.adhaerens_3        | L   | G   | S   | S   | A   | P   | E   | I | L | L | S | V | E | T | V | S | E   | I | S   | D   | P | N | S   | V | A | D   | ... | G | L | G | S | T | I | I | G | S | A | F | N | L | L | I | I | T | A | V | C | I | V | S | V | P | A | P | H | Y | K | R | V | K | E | F | G | V | F | I |   |
| N.nectensis_2        | L   | G   | S   | S   | A   | P   | E   | I | L | L | A | V | V | E | T | G | Q   | E | L   | A   | L | G | T   | A | T | ... | A   | D | L | G | P | T | I | V | G | S | A | F | N | L | L | I | I | T | A | V | C | V | S | V | P | E | N | T | V | K | R | I | E | F | G | V | F | V |   |   |   |
| H.sapiens_NCX1.1     | L   | G   | S   | S   | A   | P   | E   | I | L | L | S | V | I | E | V | C | ... | G | H   | N   | F | T | A   | G | D | L   | G   | P | S | T | I | V | G | S | A | A | F | N | M | F | I | I | A | L | C | V | Y | V | P | D | G | E | T | R | K | I | K | H | L | R | V | F | V |   |   |   |   |
| P.troglodytes_NCX1.1 | L   | G   | S   | S   | A   | P   | E   | I | L |   |   |   |   |   |   |   |     |   |     |     |   |   |     |   |   |     |     |   |   |   |   |   |   |   |   |   |   |   |   |   |   |   |   |   |   |   |   |   |   |   |   |   |   |   |   |   |   |   |   |   |   |   |   |   |   |   |   |



A.thaliana IDTSKDDNDND.....  
 A.halleri IDTSKDDNDND.....  
 A.lyrata IDTSKDENDND.....  
 C.sativus IDICKQDNPCR.....  
 C.clementina TTSCKDENDCY.....  
 R.communis ATSDKHQHNA.....  
 M.esculenta ITSSKHQPIDY.....  
 P.trichocarpa VPSPTHEENVY.....  
 P.persica VVTCKSDSGPC.....  
 C.papaya VASVDHDDNDK.....  
 A.coerulea ASLDKLDNDY.....  
 V.vinifera AASRKQDKIAG.....  
 S.tuberosum VVKHRPLDKVH.....  
 S.lycopersicum VVKYRPLDKVH.....  
 M.guttatus\_1 TAPYKDRDKYS.....  
 M.guttatus\_2 . . KNAPYRDGN.....  
 G.max TPYFQHEAHAE.....  
 M.truncatula TPKQKS . . HER.....  
 E.grandis AASYKHVDNVD.....  
 S.italica GAS . VDYDNCN.....  
 Z.mays DVSAVYYAKCD.....  
 S.bicolor DVS . VDYDNCN.....  
 T.aestivum DTSLHHDKNCD.....  
 B.distachyon DTSVDHDKNCG.....  
 O.sativa\_J1 DASVDYDDNYD.....  
 O.sativa\_I1 DASVDYDDNYD.....  
 O.sativa\_J2 DASVDYDDNYD.....  
 S.moellendorffii\_1 LHELAN.....  
 P.patens\_1 FLSLVHNGTVHDQSTAYSSSPRVLDLQHR.....  
 P.patens\_2 YFSLAIYDGEIHDQASAFSNLEVFSEQSTS.....  
 C.reinhardtii PPSVTAIVVSPAPEQAPGEAP.....  
 C.intestinalis DPAMVNGLSRRGSAVGVKSPEKSRKMNWTNEGVCVSVNGDICGGTPNMGSPALKRRHRRVSTAAPTNPA.....  
 B.floridae NVRVIGSPQGRASVLNTR.....  
 T.adhaerens\_3 VGGKSRHPSASIIIRSTSRELSNVHRESVASAHNSTYDLESVTKLNPGENRRSRANSARTSIS.....  
 N.vectensis\_2 FTKGLVDRNSLALLRFVRFVKQARNCDVVSKTSRFSLQVRVLGFTDAPSSHAMIHRSME.....  
 H.sapiens\_NCX1.1 EHEGDRPS . SKTEIEMDGKVV.....  
 P.troglodytes\_NCX1.1 EHEGDRPS . SKTEIEMDGKVV.....  
 C.familiaris\_NCX1.1 EHEGDRPS . SKTEIEMDGKVV.....  
 F.catus\_NCX1.1 EHEGDRPS . SKTEIEMDGKVV.....  
 C.porcellus\_NCX1.1 EHEGDRPS . SKTEIEMDGKVV.....  
 B.taurus\_NCX1.1 EHEGDRPS . SKTEIEMDGKVV.....  
 R.norvegicus\_NCX1.1 EHEGDRPA . SKTEIEMDGKVV.....  
 M.musculus\_NCX1.1 EHEGDRPA . SKTEIEMDGKVV.....  
 M.mulatta\_NCX1.3 EHEGDRPS . SKTEIEMDGKVV.....  
 O.cuniculus\_NCX1.2 EHEGDRPS . SKTEIEMDGKVV.....  
 S.tropicalis\_NCX1 ETEGDRPS . SKADIEMDGKVL.....  
 O.mossambicus\_NCX1.1 ETEGEPELPSKVDIEMDGKML.....  
 O.mykiss\_NCX1 ETEGEAQIPSKMDIEMDGKML.....  
 D.rerio\_NCX1a ETEGEPELQSKADIEMDGKML.....  
 H.sapiens\_NCX3.3 ETEGDHPKG . . . IEMDGKMM.....  
 R.norvegicus\_NCX3.3 ETEGEHPKG . . . IEMDGKMM.....  
 M.musculus\_NCX3.1 ETEGDHPKG . . . IEMDGKMM.....  
 G.gallus\_NCX3 ESEGDHPKG . . . IEMDGKMM.....  
 D.rerio\_NCX4a ETEGDGMFT . KMDMEMDQGA.....  
 T.nigroviridis\_NCX4a ESEGDAMFT . KMDMEMDQGV.....  
 H.sapiens\_NCX2.1 GAEGDPPKSIELDGT FVGAE.....  
 R.norvegicus\_NCX2.1 GAEGDPPKSIELDGT FVGTEV.....  
 M.musculus\_NCX2.1 GAEGDPPKSIELDGT FVGTEV.....  
 S.kowalevskii\_3 GNHYP.....  
 T.adhaerens\_2 VEPDSI . . . . . IMRSPKEE.....  
 L.opalescens\_NCX CEGQDAEAGEGKSEDC.....  
 A.mellifera\_NCX AEAGDSDGGVELEIKPQQDSF.....  
 D.melanogaster\_NCX GEHDQVEMDAEKGPQPMVTS.....  
 H.magnipapillata IQTGDGDVVAVSLKSTIKHDS.....  
 C.elegans\_NCX1 R . . . . . RSPSKKT.....  
 C.briggsae\_NCX1 R . . . . . RSPSKKT.....  
 C.elegans\_NCX2 T . . . . . EAEMKM.....  
 C.briggsae\_NCX2 T . . . . . EAEMKM.....  
 T.spiralis LRELNRRSWTGPALNGEKLL.....  
 M.brevicollis\_1 IRT.....  
 Salpingoeca NDV.....  
 S.kowalevskii\_1 DRY.....  
 S.kowalevskii\_2 .....  
 T.adhaerens\_1 DTE.....  
 D.pulex\_1 SIQ.....  
 P.humanus\_corporis MEE.....  
 O.dioica NPD.....  
 A.pisum .....  
 P.marinus MFS.....  
 A.anophagefferens\_1 YFD.....  
 E.huxleyi AFS.....  
 consensus>50 .....

|                      |                                                                         |
|----------------------|-------------------------------------------------------------------------|
| A.thaliana           | .....                                                                   |
| A.halleri            | .....                                                                   |
| A.lyrata             | .....                                                                   |
| C.sativus            | .....                                                                   |
| C.clementina         | .....                                                                   |
| R.communis           | .....                                                                   |
| M.esculenta          | .....                                                                   |
| P.trichocarpa        | .....                                                                   |
| P.persica            | .....                                                                   |
| C.papaya             | .....                                                                   |
| A.coerulea           | .....                                                                   |
| V.vinifera           | .....                                                                   |
| S.tuberosum          | .....                                                                   |
| S.lycopersicum       | .....                                                                   |
| M.guttatus_1         | .....                                                                   |
| M.guttatus_2         | .....                                                                   |
| G.max                | .....                                                                   |
| M.truncatula         | .....                                                                   |
| E.grandis            | .....                                                                   |
| S.italica            | .....                                                                   |
| Z.mays               | .....                                                                   |
| S.bicolor            | .....                                                                   |
| T.aestivum           | .....                                                                   |
| B.distachyon         | .....                                                                   |
| O.sativa_J1          | .....                                                                   |
| O.sativa_I1          | .....                                                                   |
| O.sativa_J2          | .....                                                                   |
| S.moellendorffii_1   | .....                                                                   |
| P.patens_1           | .....                                                                   |
| P.patens_2           | .....                                                                   |
| C.reinhardtii        | .....VRTHAHYRHILAAARQRHAAAAHRRRLPGAHGEGGDTELQLGSGGHAYGDV                |
| C.intestinalis       | ATELASISKKDNGRKESEERRQVEPEPAYRAFARARFRHAAIWSIGGRKRKPINLNLQPSPKLPVNDPKLL |
| B.floridae           | PTELLALEGRNRNLNDMDRPSQQGQPTNALSRARFRHAAVVRSMLYQK.....KAPKPKARFA         |
| T.adhaerens_3        | .....RSSFVYEDHGKIQVDIKPSNSFARARFRHAAIRSLMGGKRHRRSKSVTDKMVELESGLFNS      |
| N.vectensis_2        | .....RALEQHRGSRVNSSFDRFRHAAALRSVTRSKKLIKINEGEDVE.....                   |
| H.sapiens_NCX1.1     | .....NSHVENFLDGLVLEVDERDQD.....DEEARREMARIL                             |
| P.troglodytes_NCX1.1 | .....NSHVENFLDGLVLEVDERDQD.....DEEARREMARIL                             |
| C.familiaris_NCX1.1  | .....NSHVDNFLDGLVLEVDERDQD.....DEEARREMARIL                             |
| F.catus_NCX1.1       | .....NSHVDNFLDGLVLEVDERDQD.....DEEARREMARIL                             |
| C.porcellus_NCX1.1   | .....NSHVENFLDGLVLEVDERDQD.....DEEARREMARIL                             |
| B.taurus_NCX1.1      | .....NSHVDNFLDGLVLEVDERDQD.....DEEARREMARIL                             |
| R.norvegicus_NCX1.1  | .....NSHVDNFLDGLVLEVDERDQD.....DEEARREMARIL                             |
| M.musculus_NCX1.1    | .....NSHVDNFLDGLVLEVDERDQD.....DEEARREMARIL                             |
| M.mulatta_NCX1.3     | .....NSHVENFLDGLVLEVDERDQD.....DEEARREMARIL                             |
| O.cuniculus_NCX1.2   | .....NSHVDNFLDGLVLDVDERDQD.....DEEARREMARIL                             |
| S.tropicalis_NCX1    | .....NSHTETFLDGLVLEVDEKQDQD.....EEEEARRDMAKIL                           |
| O.mossambicus_NCX1.1 | .....NSHGEEFTEELE.G..KELD.....EEEEARREVARIL                             |
| O.mykiss_NCX1        | .....NS..ESFMDGAM..GFDEKDL.....DEEARREMARIL                             |
| D.rerio_NCX1a        | .....NSHAEFLDGAV..DNEDKAD.....DEEARREMAKIL                              |
| H.sapiens_NCX3.3     | .....NSHFLDGNLVPLEGKEVD.....ESRREMIRIL                                  |
| R.norvegicus_NCX3.3  | .....NSHFLDGNLIPLEGKEVD.....ESRREMIRIL                                  |
| M.musculus_NCX3.1    | .....NSHFLDGNFPLEGKEVD.....ESRREMIRIL                                   |
| G.gallus_NCX3        | .....NSHFLDGNLVTVLEGKEVD.....ESRREMIRIL                                 |
| D.rerio_NCX4a        | .....NSH..KEALDGMLAGVEEGGGGEE.....DEEARREMARIL                          |
| T.nigroviridis_NCX4a | .....NSHTHPKEALDGMLEGMEEGGGMISEQDQEEARREMARIL                           |
| H.sapiens_NCX2.1     | .....PGELGLGPGPAEARELDA.....SRREVIQIL                                   |
| R.norvegicus_NCX2.1  | .....PGELGALGTGPAEARELDA.....SRREVIQIL                                  |
| M.musculus_NCX2.1    | .....PGELGALGTGPAEARELDA.....SRREVIQIL                                  |
| S.kowalevskii_3      | .....LSHEYDDVEYRGRFEDDELDFEDIKDLDESQRQEAIRIL                            |
| T.adhaerens_2        | .....RDESEGFNSVYKNNPMYDVDSIDDDVSEKNDMRRKKAMQIV                          |
| L.opalescens_NCX     | .....ALKEGGDDVEVREF.....EQHRKEYIEIL                                     |
| A.mellifera_NCX      | .....HNMMADATPEAKEF.....EQTRRDYINTL                                     |
| D.melanogaster_NCX   | .....ARGNDAEA...F.....DEARREYITLL                                       |
| H.magnipapillata     | .....SNDNVDEKDIELLPLEEDDDPLEIINDKK.....KKAMEAF                          |
| C.elegans_NCX1       | .....RENVENGA..GLPGDATQNLIGGDADALAFEIHRHRYLDIF                          |
| C.briggsae_NCX1      | .....HENALESNGGIPGDQONQSLIGGDADALAFEIHRHRYLDIF                          |
| C.elegans_NCX2       | .....LENGTQG.....DPALKAFEHRQEFIELM                                      |
| C.briggsae_NCX2      | .....LENGSPQ.....GADPALKAFEHRQEFIELM                                    |
| T.spiralis           | .....DVVEQNRVD.....RLS                                                  |
| M.brevicollis_1      | .....EDGRNIAFDPYDM.....AV                                               |
| Salpingoeca          | .....EHGHQFHDPYAD.....TI                                                |
| S.kowalevskii_1      | .....LTAENVTKEGVADVM.....KEIGKHPDITPEQ                                  |
| S.kowalevskii_2      | .....LIGNVTVREGVADVM.....KEMGKHPDITPEQ                                  |
| T.adhaerens_1        | .....NGHLAFDDSTGRLVPSDFDKSSANSFLKAVKTRTDITAE                            |
| D.pulex_1            | .....PGELEAMVDGLTLTKDQVDPNELAKWVRQASRMGLTGED                            |
| P.humanus_corporis   | .....SKKIFVERKFIKDGKI..DKETLYSFFKELKKYPGISND                            |
| O.dioica             | .....TPEGIELLKGQRPNMMLVDEFMKDFEGDPLTIDEQAAA                             |
| A.pisum              | .....EHNTHQLDLDLQGNKENLIKFKVKNVKKYSGITDAD                               |
| P.marinus            | .....IKTNVASAHRDHIVGLELSPDELVD.....LM                                   |
| A.anophagefferens_1  | .....TAKISPVSSAHVIQVGSSTPFRPYEFS.....DL                                 |
| E.huxleyi            | .....CPDKARPATHVVVAFTRDGKPIRHRSPAREAATQWARGDL                           |
| consensus>50         | .....                                                                   |











|                      |                                                                        |                         |
|----------------------|------------------------------------------------------------------------|-------------------------|
| A.thaliana           | .....                                                                  | .....                   |
| A.halleri            | .....                                                                  | .....                   |
| A.lyrata             | .....                                                                  | .....                   |
| C.sativus            | .....                                                                  | .....                   |
| C.clementina         | .....                                                                  | .....                   |
| R.communis           | .....                                                                  | .....                   |
| M.esculenta          | .....                                                                  | .....                   |
| P.trichocarpa        | .....                                                                  | .....                   |
| P.persica            | .....                                                                  | .....                   |
| C.papaya             | .....                                                                  | .....                   |
| A.coerulea           | .....                                                                  | .....                   |
| V.vinifera           | .....                                                                  | .....                   |
| S.tuberosum          | .....                                                                  | .....                   |
| S.lycopersicum       | .....                                                                  | .....                   |
| M.guttatus_1         | .....                                                                  | .....                   |
| M.guttatus_2         | .....                                                                  | .....                   |
| G.max                | .....                                                                  | .....                   |
| M.truncatula         | .....                                                                  | .....                   |
| E.grandis            | .....                                                                  | .....                   |
| S.italica            | .....                                                                  | .....                   |
| Z.mays               | .....                                                                  | .....                   |
| S.bicolor            | .....                                                                  | .....                   |
| T.aestivum           | .....                                                                  | .....                   |
| B.distachyon         | .....                                                                  | .....                   |
| O.sativa_J1          | .....                                                                  | .....                   |
| O.sativa_I1          | .....                                                                  | .....                   |
| O.sativa_J2          | .....                                                                  | .....                   |
| S.moellendorffii_1   | .....                                                                  | .....                   |
| P.patens_1           | .....                                                                  | .....                   |
| P.patens_2           | .....                                                                  | .....                   |
| C.reinhardtii        | LG.....                                                                | .....                   |
| C.intestinalis       | .....                                                                  | .....                   |
| B.floridae           | .....                                                                  | .....                   |
| T.adhaerens_3        | .....                                                                  | .....                   |
| N.vectensis_2        | .....                                                                  | .....                   |
| H.sapiens_NCX1.1     | IGEPRLVEMS.....                                                        | EKKALLLNLGGFTIT.GKYLF   |
| P.troglodytes_NCX1.1 | IGEPRLVEMS.....                                                        | EKKALLLNLGGFTIT.GKYLF   |
| C.familiaris_NCX1.1  | IGEPRLVEMS.....                                                        | EKKALLLNLGGFTIT.GKYLY   |
| F.catus_NCX1.1       | IGEPRLVEMS.....                                                        | EKKALLLNLGGFTIT.GKYLY   |
| C.porcullus_NCX1.1   | IGEPRLVEMS.....                                                        | EKKALLLNLGGFTIT.GKHLV   |
| B.taurus_NCX1.1      | IGEPRLVEMS.....                                                        | EKKALLLNLGGFTIT.GKYLY   |
| R.norvegicus_NCX1.1  | IGEPRLVEMS.....                                                        | EKKALLLNLGGFTIT.GKMY    |
| M.musculus_NCX1.1    | IGEPRLVEMS.....                                                        | EKKALLLNLGGFTIT.GKMY    |
| M.mulatta_NCX1.3     | LEEPKWIRRG.....                                                        | MK.....GGFTIT.....      |
| O.cuniculus_NCX1.2   | LEEPKWIRRG.....                                                        | MK.ALLLNLGGFTIT.....    |
| S.tropicalis_NCX1    | VGEPRLVEMS.....                                                        | EKKALLLNLGGFTIT.GKILY   |
| O.mossambicus_NCX1.1 | IGEPRLLEMS.....                                                        | ERKAVLLQEVGGFVKT.....   |
| O.mykiss_NCX1        | MGEPQLLEMS.....                                                        | ERKAVLLQEVGGFVKT.....   |
| D.rerio_NCX1a        | IGEPQLVEMS.....                                                        | ERKAMLLHECGGFVKT.D.KQLY |
| H.sapiens_NCX3.3     | LGEPKWMMERG.....                                                       | IS.ALLLSPDVTDRK.....    |
| R.norvegicus_NCX3.3  | LGEPKWMMERG.....                                                       | IS.ALLLSPDVTDRK.....    |
| M.musculus_NCX3.1    | MMGPRMVDMS.....                                                        | VQKALLLSPDVTDRK.....    |
| G.gallus_NCX3        | LMSPRMVDMS.....                                                        | LQKALLLAE...RK.....     |
| D.rerio_NCX4a        | LGEPVLLLEIG.....                                                       | QKHG.....               |
| T.nigroviridis_NCX4a | LEEPILLEVG.....                                                        | QKHG.....               |
| H.sapiens_NCX2.1     | LGQPQWLKRG.....                                                        | ISALLLNQGDGDRK.....     |
| R.norvegicus_NCX2.1  | LGQPQWLKRG.....                                                        | ISALLLNQGDGDRK.....     |
| M.musculus_NCX2.1    | LGQPQWLKRG.....                                                        | ISALLLNQGNQDCK.....     |
| S.kowalevskii_3      | LGEPRLVKRG.....                                                        | QGSDDDSAYGDK.....       |
| T.adhaerens_2        | LGEPYFK.....                                                           | .....                   |
| L.opalescens_NCX     | LDEPYLVKKP.....                                                        | TGSSSGSVVEDDDP.....     |
| A.mellifera_NCX      | LGEPQLQGGD.....                                                        | GLAAEMKQPEER.....       |
| D.melanogaster_NCX   | IGEPRLAPDD.....                                                        | ELAACKIKEVEKKPV.....    |
| H.magnipapillata     | LGEPKIVGKL.....                                                        | NSTITNLSSI.....         |
| C.elegans_NCX1       | LGEPiWHRELADDEEGIEGKPILG.....                                          | .....                   |
| C.elegans_NCX2       | LSPPIWAKKMNDLSRIQERFQRRMERKRGSSVASESKDSNTENALAPAEKSTRAASVDLLQPCSDPRRSS | .....                   |
| C.briggsae_NCX2      | LSPPIWAKKMNDLSRIQERFQRRMERKRGSSVASESKDSNTETALAPTDKSTRAASVDLLQPCSDPRRSS | .....                   |
| T.spiralis           | LLP.....                                                               | .....                   |
| M.brevicollis_1      | HLEEVs.....                                                            | .....                   |
| Salpingoeca          | TLEESE.....                                                            | .....                   |
| S.kowalevskii_1      | ELLEVS.....                                                            | .....                   |
| S.kowalevskii_2      | ELLEVS.....                                                            | .....                   |
| T.adhaerens_1        | ELFDPN.....                                                            | .....                   |
| D.pulex_1            | ELSDPT.....                                                            | .....                   |
| P.humanus_corporis   | ELFSPS.....                                                            | .....                   |
| O.dioica             | SIVKVS.....                                                            | .....                   |
| A.pisum              | KLFETT.....                                                            | .....                   |
| P.marinus            | ILSKPS.....                                                            | .....                   |
| A.anophagefferens_1  | EFTIVL.....                                                            | .....                   |
| E.huxleyi            | VLDEPG.....                                                            | .....                   |
| consensus>50         | .....                                                                  | .....                   |



|                      | 290           | 300             | 310            | 320                      | 330        | 340                          |
|----------------------|---------------|-----------------|----------------|--------------------------|------------|------------------------------|
| A.thaliana           | NDTGITYH      | TVADTPPPDSATKK  | ...GK          | AKNSTVFDIWKHQFV          | DAITLETSES | DSIYLRIAKSFWHL               |
| A.halleri            | NDTGITYH      | TVADTPPPDSATKK  | ...GK          | AKNSVFDIWKHQFV           | DAITLETSES | DSIYLRIANSFWQLL              |
| A.lyrata             | NDTGITYH      | TVADTPPPDSATKK  | ...GK          | AKNSTVFGIWKHQFV          | DAITLETSES | DSIYLRIAKSFWQLL              |
| C.sativus            | GVVYHEVP      | GHDIAESSNSNIPE  | EMD            | GKADHPHVLKIKWQQFV        | DALSLETSES | KQNNIYLRLARLWCQOLI           |
| C.clementina         | TSPLYQKV      | PGSEDAEISKES    | FR             | ELINSELPVHVLWKQQFV       | DSIALESPE  | SRKLNIIYLRLARLVCQOLI         |
| R.communis           | TDPVYQKV      | PETDEAAESSNYS   | LS             | EKDL...DVVALWKQQFV       | DAIMLERPE  | SRKLNIIYLRLARLVCQOLI         |
| M.esculenta          | TDQVYHKV      | PETDDAVEFSDKN   | F              | HSEQDF...NVAALWKRQFL     | DAITLESLE  | SRNMFSIHRLARLVCQOLI          |
| P.trichocarpa        | T...VYQKV     | PVTDDAAESSNKH   | F              | HQEKDL...HVLSSLWKEQFV    | DALTLESLE  | TRKLNIIHLRVARLVCQOLI         |
| P.persica            | ...PVYQNV     | PGTDETPYYSNKDS  | PE             | KMSLEDYHVFAIWQQFV        | DAVKLKSTE  | SRQLNIIYLRLARLVCQOLI         |
| C.papaya             | ...SPLYQKV    | PADENIPEPSGKS   | SR             | KEBILLEDPNVLTWKKQQFV     | DIFKVEKSD  | SRKLNIIYLRLARLVCQOLI         |
| A.coerulea           | PLYQRVPS      | NS...DVAESSNMHF | H              | NKSKNIIQDFNVFTVWKHQFV    | DAMVLENPE  | SRKLNIIYLRLARLVCQOLI         |
| V.inifera            | SVYHRISGS     | ...EVAEPSENEHF  | Q              | KNIILEDSHLLSLWKQQFV      | DAITLESSE  | SRKLNIIYLRLARLVCQOLI         |
| S.tuberosum          | HFYRNLAG      | ...EDVTESTPN    | NG             | NIPEESDILSIWKHQFV        | DALMLESTE  | SRKLNIIYLRLARLVCQOLI         |
| S.lycopersicum       | HFYQNLAG      | ...EDVTESTPN    | NC             | YIPEESDILSIWKHQFV        | DALMLESTE  | SRKLNIIYLRLARLVCQOLI         |
| M.guttatus_1         | HFYQNLSG      | ...SDSGEPSSG    | Q              | SHEDIHVKDNLI.SIWKQQFV    | DAFVLEGG   | QESRKLNIIYLRLARLVCQOLI       |
| M.guttatus_2         | VYENVADT      | ...DIHESSE      | Q              | CRVDTIHPKDDLLSVWKMQFV    | DALTLESPE  | SKLNIIYLRLARLVCQOLI          |
| G.max                | PLYARVPSI     | ...NDEAEBILD    | K              | AKETITLVDTHLLTIWRQQFL    | DALRLLRPE  | SKLNIIYLRLARLVCQOLI          |
| M.truncatula         | MSYVRVPI      | ...DD.AENS      | D              | KVIETRLTLEDCLLTWKKQQFV   | DALTLESPE  | SKLNIIYLRLARLVCQOLI          |
| E.grandis            | ...S          | DLAES           | SNELHVALWKEQFV | DALMLES                  | SAETKLYS   | VYVRLRMLWQLL                 |
| S.italica            | EY...H        | KVPENDMECSSTMN  | F              | NKTRTETSWSRSLWRQQFV      | DAFMLESPE  | SRKLNIIYLRLARLVCQOLI         |
| Z.mays               | EY...S        | QLAEDMEGSSSTM   | D              | QVVKNTQDNMSWLSIWWQQFV    | DASMLESP   | ESMKMDSVCLRYTRIFWNLI         |
| S.bicolor            | EY...S        | RVPEKDMGSSSTM   | D              | QVVKNTQEDISWLSIWWQQFV    | DASMLESP   | ESMKMDSVCLRYTRIFWNLI         |
| T.aestivum           | Y...H         | HVPEKDIIESSKTT  | LV             | VKNTQEDIYWSVWRQQFV       | DAMVLESP   | ELKMKDPVCLRFIIICWNSI         |
| B.distachyon         | Y...H         | HVPEKDIIESSKTT  | LV             | VKNTQEDITCWSIWRQQFV      | DALMLESPE  | QRKLNIIYLRLARLVCQOLI         |
| O.sativa_J1          | Y...H         | HVSEEDVEESS     | T              | GLTLKNKWEDTHWFSIWWQQFV   | DAATLESS   | SVSRKMDSTCLRVIIGISWNLI       |
| O.sativa_J1          | Y...H         | HVSEEDVEESS     | T              | GLTLKNKWEDTHWFSIWWQQFV   | DAATLESS   | SVSRKMDSTCLRVIIGISWNLI       |
| O.sativa_J2          | Y...H         | HVSEKDVVEESP    | T              | GLTLKNKWEDTHWFSIWWQQFV   | DAATLESS   | SVSRKMDSTCLRVIIGISWNLI       |
| S.moellendorffii_1   | FSSRAEDV      | DTSSRDNFALRE    | G              | AEIYEHFSSWKALGTAWKNQFV   | DAMTVSFF   | FEGRQRKLRTPSTLQLLHPI         |
| P.patens_1           | ENDPG...      | ...SNQEFKQRLAYD | I              | EQFTSMWTYIYSTWKKQFL      | DVIVFQGQ   | VDDSGKLNALTAVF               |
| P.patens_2           | LTGSGKNS      | ESNQELVKLRSTNE  | I              | DHETSGRVTRNACSLWKMQFL    | DAIFIEKH   | VDESGKDHSPIAVDCVGHLI         |
| C.reinhardtii        | GAEGGAGS      | DKGEGEGEFNL     | WS             | AWREQIVSV...FSPDEPDE     | GEVVS      | WAGMLQVYVGIN                 |
| C.intestinalis       | LEACGINS      | MSRVLIDENDTT    | W              | VGQIRNAMIV...GGEMDDY     | NE         | SPPSNTDFLMHAIT               |
| B.floridae           | LAERVANV      | VPMGDTEEDTDS    | WG             | QFRSAMCL...ESEEDEDG      | KKIP       | PSVGLIMHFV                   |
| T.adhaerens_3        | LGDVRVAE      | FALANGVEGEDVS   | WA             | EQFRNALT...GSDIDEPG      | EE         | SPPSNLDYILHFI                |
| N.vectensis_2        | ...AMII       | ...QGDEKDG      | NE             | KLPLNSI                  | DF         | IMHFL                        |
| H.sapiens_NCX1.1     | DKLIKKT       | NLALV...VGTNS   | WR             | EQFIEAITSVAG.E...DDDDECG | ...E       | EKLPSCFDYVMHFL               |
| P.troglodytes_NCX1.1 | DKLIKKT       | NLALV...VGTNS   | WR             | EQFIEAITSVAG.E...DDDDECG | ...E       | EKLPSCFDYVMHFL               |
| C.familiaris_NCX1.1  | DKLIKKT       | NLALV...VGTNS   | WR             | EQFIEAITSVAG.E...DDDDECG | ...E       | EKLPSCFDYVMHFL               |
| F.catus_NCX1.1       | DKLIKKT       | NLALV...VGTNS   | WR             | EQFIEAITSVAG.E...DDDDECG | ...E       | EKLPSCFDYVMHFL               |
| C.porcullus_NCX1.1   | DKLIKKT       | NLALV...VGTNS   | WR             | EQFIEAITSVAG.E...DDDDECG | ...E       | EKLPSCFDYVMHFL               |
| B.taurus_NCX1.1      | DKLIKKT       | NLALV...VGTNS   | WR             | EQFIEAITSVAG.E...DDDDECG | ...E       | EKLPSCFDYVMHFL               |
| R.norvegicus_NCX1.1  | DKLIKKT       | NLALV...VGTNS   | WR             | EQFIEAITSVAG.E...DDDDECG | ...E       | EKLPSCFDYVMHFL               |
| M.musculus_NCX1.1    | DKLIKKT       | NLALV...VGTNS   | WR             | EQFIEAITSVAG.E...DDDDECG | ...E       | EKLPSCFDYVMHFL               |
| M.mulatta_NCX1.3     | DKLIKKT       | NLALV...VGTNS   | WR             | EQFIEAITSVAG.E...DDDDECG | ...E       | EKLPSCFDYVMHFL               |
| O.cuniculus_NCX1.2   | DKLIKKT       | NLALV...VGTNS   | WR             | EQFIEAITSVAG.E...DDDDECG | ...E       | EKLPSCFDYVMHFL               |
| S.tropicalis_NCX1    | DKLIKKT       | NLALV...VGTNS   | WR             | EQFIEAITSVAG.E...DDDDECG | ...E       | EKLPSCFDYVMHFL               |
| O.mossambicus_NCX1.1 | DKLIKKT       | NLALL...IGTNS   | WR             | EQFIEAITSVSSG...DD       | ...E       | ECR...EKLPSCFDYVMHFL         |
| O.mykiss_NCX1        | DKLIKKT       | NLALL...IGTNS   | WR             | EQFIEAITSVSSG...DD       | ...E       | DEDECG...EKLPSCFDYVMHFL      |
| D.rerio_NCX1a        | DKLIKKT       | NLALL...VGTNS   | WR             | QDFVEAITSVNSG...DD       | ...E       | DEDECG...QEKMPSCFDYVMHFL     |
| H.sapiens_NCX3.3     | DKLIKKT       | NLALV...VGTNS   | WR             | EQFIEAITSVAA.G...DEDESG  | ...E       | ERLPSCFDYVMHFL               |
| R.norvegicus_NCX3.3  | DKLIKKT       | NLALV...VGTNS   | WR             | EQFIEAITSVAA.G...DEDESG  | ...E       | ERLPSCFDYVMHFL               |
| M.musculus_NCX3.1    | DKLIKKT       | NLALV...VGTNS   | WR             | EQFIEAITSVAA.G...DEDESG  | ...E       | ERLPSCFDYVMHFL               |
| G.gallus_NCX3        | DKLIKKT       | NLALV...VGTNS   | WR             | EQFIEAITSVAA.G...DEDESG  | ...E       | ERLPSCFDYVMHFL               |
| D.rerio_NCX4a        | DKLIKKT       | NLALV...VGTNS   | WR             | EQFIEAITSVAG...DD        | ...E       | DEEESG...ERLPSCFDYIMHFL      |
| T.nigroviridis_NCX4a | DKLIKKT       | NLALV...VGTNS   | WR             | EQFIEAITSVAG...DD        | ...E       | DEEESG...ERLPSCFDYIMHFL      |
| H.sapiens_NCX2.1     | DKLIKKT       | NLALV...VGTNS   | WR             | EQFIEAITSVAGDE...E       | ...E       | EEDGSR...ERLPSCFDYIMHFL      |
| R.norvegicus_NCX2.1  | DKLIKKT       | NLALV...VGTNS   | WR             | EQFIEAITSVAGDE...E       | ...E       | EEDGSR...ERLPSCFDYIMHFL      |
| M.musculus_NCX2.1    | DKLIKKT       | NLALV...VGTNS   | WR             | EQFIEAITSVAGDE...E       | ...E       | EEDGSR...ERLPSCFDYIMHFL      |
| S.kowalevskii_3      | DKLIKKA       | NLSLV...VGTSS   | WR             | EQFIEAVTVSSG...DD        | ...E       | DEDEG...EKLPSCFDYIMHFL       |
| T.adhaerens_2        | DKLLKKA       | NLAMA...IGTSS   | WR             | EQFIEAALTVNGGDN...DD     | ...D       | DDDD...EETKPTCYDYIMHFL       |
| L.opalescens_NCX     | DKLLKKA       | NLSLV...VGTSS   | WR             | EQFIEAITVN.AEG...DD      | ...D       | DDDEGE...EKLPSCFDYIMHFL      |
| A.mellifera_NCX      | DKLVQRA       | NASIL...LGTSS   | WK             | EQFIEALTVSGGDE...D       | ...D       | DEGGG...EPAAPSTLDYLMHGV      |
| D.melanogaster_NCX   | DKLVAKA       | NKSAV...LGTSS   | WK             | EQFIEKDALTVPADE...E      | ...E       | FDNDE...EEVPSCFDYVSHFV       |
| H.magnipapillata     | DQMSAK        | NKSL...GSSS     | WA             | QFQKDAFQVEYGG...D        | ...D       | DEEEG...DDVEPTYGDYVMHFL      |
| C.elegans_NCX1       | DRALVTA       | NKSIM...VGTSS   | WK             | QFTEAFTLEP...E           | ...E       | EDGVEVTMEKVMHYI              |
| C.briggsae_NCX1      | DKVLVTA       | NKSIM...VGTSS   | WK             | QFTEAFTLEP...E           | ...E       | EDGVEVTMEKVMHYI              |
| C.elegans_NCX2       | DRMIKNA       | NTRIM...LGTSS   | WR             | EQFIEALVVSAGDD...D       | ...D       | DEGEDGEDGEEKPEEGPCM DYVMHFL  |
| C.briggsae_NCX2      | DRMIKNA       | NTRIM...LGTSS   | WR             | EQFIEALVVSAGDD...D       | ...D       | DEE.E.GDDGEEKPEEGPCM DYVMHFL |
| T.spiralis           | AKFEEKVR      | QSLTCKLESST     | WK             | EQFLKAVSNGG...D          | ...D       | ETSDASMVDCFAHII              |
| M.brevicollis_1      | EKVSRRMK      | INMDRFRVGSDD    | WK             | QFRAV...D                | ...D       | AWPE...REAGVLGIVMHLI         |
| Salpingoeca          | DKVTALL       | NLNLDKFRIGGTD   | W              | KQFQDAL...D              | ...D       | AWPE...EGSGTFAIVMHLI         |
| S.kowalevskii_1      | DRVVSIT       | NVNLDRLRIGNAS   | WA             | DQFK.EAM...D             | ...D       | NVNGGDIESATWVDYVMHFL         |
| S.kowalevskii_2      | DRVVSIT       | NVNLDRLRIGNAS   | WA             | DQFK.EAM...D             | ...D       | NVNGGDIESATWVDYVMHFL         |
| T.adhaerens_1        | DKVVALTR      | INVHRLKLGSSQ    | WG             | EQFTAM...D               | ...D       | TVNGGDVENATGMDYFLHFL         |
| D.pulex_1            | NRLADMT       | TANVDSMEVHST    | W              | SQTKDAM...D              | ...D       | NVNGGDVENATGMDYVMHFL         |
| P.humanus_corporis   | DKMLAMT       | NLKLKTLIYRKT    | W              | SQTKDAM...D              | ...D       | NVNGGDVENATGMDYFLHFL         |
| O.dioica             | KRVAAQT       | HVALSKMEIGGDS   | W              | EQF.EAM...D              | ...D       | NVNGGDVENATGMDYFLHFL         |
| A.pisum              | DRMLLLT       | INIHALELHRQT    | W              | EQTKTAM...D              | ...D       | TVNGGDVENATGMDYFLHFL         |
| P.marinus            | DSLICTI       | WIKPKSGISQGRIT  | TV             | EDLLNVHWGKMSLGATNWRE     | QFNEALVW   | NGSREDDQSEAGVGDYVMHFL        |
| A.anophagefferens_1  | KHTELKV       | IVADTETKDMIDNV  | Q              | KYVLESDNASYVNGSTWQQ      | FSDALKV    | GGGDADDDFKASAGDWMHII         |
| E.huxleyi            | KQVASLMS      | LNVDAMQLAGAS    | WR             | EQLEA.VTFFPPRQATTARA     | LDGPELL    | GGASPPAALSLSCFFAFAGFAI       |
| consensus>50         | d.....n.....w | .....eqf        | .....ea        | .....d.....d.....e       | .....ee    | .....dymh.1                  |

350            360            370            380            390            400            410  
 A.thaliana      LAPWKLFLFAFVPP..CNIAGHWIAFICSLLFISGVAVFVTRFTDLISCVTGINPVIYAFTALASGTSWPD  
 A.halleri        LAPWKLFLFAFVPP..CNIAGHWIAFIFSLLFISGVAVFVTRFTDLISCVTGINPVIYAFTALASGTSWPD  
 A.lyrata        LAPWKLFLFAFVPP..CNIAGHWIAFICSLLFISGVAVFVTRFTDLISCVTGINPVIYAFTALAGTSWPD  
 C.satius        VAPWRLFLFAFVPP..YHIAHGWIAFICSLMFISSGIAYVTKFTDLISCVSGINPVIYAFTALASGTSWPD  
 C.clementina    LVPWRFLFAFVPP..YHIAHGWIAFICSLIFISGIAYIVTKLTDIISCVTGINAVVIAFTALASGTSWPD  
 R.communis      LVPWRLFLFAFVPP..YHIAHGWIAFICSLIFISGIAYIVTKLTDIISCVTGINAVVIAFTALAGTSWPD  
 M.esculenta     LAPWRLFLFAFVPP..YHIAHGWIAFICSLIFISGIAYIVTKLTDIISCVTGINAVVIAFTALASGTSWPD  
 P.trichocarpa    LAPWRLFLFAFVPP..YHFAHGWIAFIFSLLFISGIAYIVTKLTDIISCVTGINAVVIAFTALASGTSWPD  
 P.persica        LVPWRLFLFAFVPP..YHIAHGWIAFICSLVFISSAIAYIVTKLTDIISCVTGINPVIYAFTALASGTSWPD  
 C.papaya        LAPWRFMFVAFVPP..YHISHGWIAFVCSLFISSGIAYIVTKLTDIISCVTGINAVVIAFTALACGTSWPD  
 A.coerulea      LAPWRVFLFAFVPP..CHIAHGWIAFICSLIFISGIAYIVTKLTDIISCVTGINAVVIAFTALASGTSWPD  
 V.vinifera      LLPWRFLFAFVPP..PHIAHGWIAFICSLIFISGIAYIVTKLTDIISCVTSGINSVIAFTALAGTSWPD  
 S.tuberosum     LLPWKLFLFAFVPP..YQIAHGWIAFICSLIFISGIAYVTKITDIISSCVTGINPVIYAFTALASGTSWPD  
 S.lycopersicum    LLPWKLFLFAFVPP..YQIAHGWIAFICSLIFISGIAYVTKITDIISSCVTGINPVIYAFTALASGTSWPD  
 M.guttatus\_1    LAPWRILFAFVPP..CQIAHGWIAFISLIFISGIAYVTKITDIISSCVTGINAVVIAFTALAGTSWPD  
 M.guttatus\_2    LAPWRLFLFAFVPP..YQIANGWIAFIFSLVFISSGIAYIVTKITDIISSCVTGINAVVIAFTALAGTSWPD  
 G.max            LAPWRFLFAFVPP..CQIAHGWIAFICSLIFISGIAYVTKITDIISSCVTGINAVVIAFTALAGTSWPD  
 M.truncatula    LLPWRFMFVAFVPP..CHIAHGWIAFICSLIFISGIAYIVTKITDIISSCVTGINAVVIAFTALASGTSWPD  
 E.grandis        LAPWRLMFVAFVPP..CQIAHGWIAFICSLIFISGIAYVTKITDIISSCVTGINAVVIAFTALATGTSWPD  
 S.italica        IAPWKLFLFAFVPP..YHIAHGWIAFICSLIFISGIAYVTKITDIISSCVTGVSPVIAFTALAGTSWPD  
 Z.mays           IAPWKLFLFAFVPP..YHIAHGWIAFICSLIFISGIAYVTKITDIISSCVTGVSPVIAFTALAGTSWPD  
 S.bicolor        IAPWKLFLFAFVPP..YHIAHGWIAFICSLIFISGIAYVTKITDIISSCVTGVSPVIAFTALAGTSWPD  
 T.aestivum      IAPWKLFLFAFVPP..YQIAHGWIAFIFSLIFISGIAYVTKITDIISSCVTGLNVPVIAFTALAGTSWPD  
 B.distachyon    IAPWKLFLFAFVPP..YQIAHGWIAFICSLIFISGIAYVTKITDIISSCVTGVNVPVIAFTALAGTSWPD  
 O.sativa\_J1     IAPWKLFLFAFVPP..YHIAHGWIAFICSLIFISGIAYVTKITDIISSCVTGVSPVIAFTALAGTSWPD  
 O.sativa\_J1     IAPWKLFLFAFVPP..YHIAHGWIAFICSLIFISGIAYVTKITDIISSCVTGVSPVIAFTALAGTSWPD  
 O.sativa\_J2     IAPWKLFLFAFVPP..YHIAHGWIAFICSLIFISGIAYVTKITDIISSCVTGVSPVIAFTALAGTSWPD  
 S.moellendorffii\_1 VSYWVKSFAFVPP..VQLLHGWLAEFLGSCIFITWISYVVALSNRINCVTGISSYVVALTVALAGTSLPN  
 P.patens\_1       TLPWRFLFAFVPP..PSSLHGWAFLCALAHITVIACFLIKLTLNFCGVTGISYVVALTVALAGTSLPD  
 P.patens\_2       ILPWVFLFAFVPP..PMLLNGWPAFMCALAFITVIVISCFLIKLANFCGVTGVSDVVALTVALAGTSLPD  
 C.reinhardtii    ITWKLVLFLVLPDAEWK..GYPCEFAALGFIIVGVVLENEAGSLFCGIGLKEVVMGVSIIVAGTSLPD  
 C.intestinalis   SMPWKIVFALAPTRHAY..GGPAPFISLILMIGLTAIIEQLGHLLGCVATLKTQVTGITIIVALGTSLPD  
 B.floridae      TFFWKLFLFAFVPPRSML..GGWPAFVMSLGFITMLTAFIETLGHLLGCVFGVRTSVTGITIIVALGTSLPD  
 T.adhaerens\_3    AFLWKIIAATIPRRTVL..GGWPAFVMSLVYIGFLTAIIEQFNLGCVILKPSVTGITIIVALGTSLPD  
 N.vectensis\_2    TFFWKLFLFAFVPPRPL..GGWPAFVMSLFIITMLTAVIEQLGKLLGCVVDLRNSVTGITIIVALGTSLPD  
 H.sapiens\_NCX1.1 TVFWKVLFAFVPPTEYW..NGWACFIVSILMIGLLTAFIGDLASHFCGITGLKDSVTAVVVALGTSVPD  
 P.troglodytes\_NCX1.1 TVFWKVLFAFVPPTEYW..NGWACFIVSILMIGLLTAFIGDLASHFCGITGLKDSVTAVVVALGTSVPD  
 C.familiaris\_NCX1.1 TVFWKVLFAFVPPTEYW..NGWACFIVSILMIGLLTAFIGDLASHFCGITGLKDSVTAVVVALGTSVPD  
 F.catus\_NCX1.1    TVFWKVLFAFVPPTEYW..NGWACFIVSILMIGLLTAFIGDLASHFCGITGLKDSVTAVVVALGTSVPD  
 C.porcullus\_NCX1.1 TVFWKVLFAFVPPTEYW..NGWACFIVSILMIGLLTAFIGDLASHFCGITGLKDSVTAVVVALGTSVPD  
 B.taurus\_NCX1.1    TVFWKVLFAFVPPTEYW..NGWACFIVSILMIGLLTAFIGDLASHFCGITGLKDSVTAVVVALGTSVPD  
 R.norvegicus\_NCX1.1 TVFWKVLFAFVPPTEYW..NGWACFIVSILMIGLLTAFIGDLASHFCGITGLKDSVTAVVVALGTSVPD  
 M.musculus\_NCX1.1 TVFWKVLFAFVPPTEYW..NGWACFIVSILMIGLLTAFIGDLASHFCGITGLKDSVTAVVVALGTSVPD  
 M.mulatta\_NCX1.3    TVFWKVLFAFVPPTEYW..NGWACFIVSILMIGLLTAFIGDLASHFCGITGLKDSVTAVVVALGTSVPD  
 O.cuniculus\_NCX1.2 TVFWKVLFAFVPPTEYW..NGWACFIVSILMIGLLTAFIGDLASHFCGITGLKDSVTAVVVALGTSVPD  
 S.tropicalis\_NCX1 TVFWKVLFAFVPPTEYW..NGWACFIVSILMIGLLTAFIGDLASHFCGITGLKDSVTAVVVALGTSVPD  
 O.mossambicus\_NCX1.1 TIFWKLFLFAFVPPTDYW..NGWACFIVSITVIGMLTAFIGDLASHFCGTVGLKDSVTAVVVALGTSVPD  
 O.mykiss\_NCX1    TVFWKVLFAFVPPTDYW..NGWACFIVSILMIGLLTAFIGDLASHFCGTVGLKDSVTAVVVALGTSVPD  
 D.rerio\_NCX1a    TVFWKVLFAFVPPTDYW..NGWACFIVSILMIGLLTAFIGDLASHFCGTVGLKDSVTAVVVALGTSVPD  
 H.sapiens\_NCX3.3    TVFWKVLFAFVPPTEYC..HGWACFVSVLITIGMLTAIIGDLASHFCGITGLKDSVTAVVVAFTGTSVPD  
 R.norvegicus\_NCX3.3 TVFWKVLFAFVPPTEYC..HGWACFVSVLITIGMLTAIIGDLASHFCGITGLKDSVTAVVVAFTGTSVPD  
 M.musculus\_NCX3.1 TVFWKVLFAFVPPTEYC..PGWACFVSVLITIGMLTAIIGDLASHFCGITGLKDSVTAVVVAFTGTSVPD  
 G.gallus\_NCX3    TVFWKVLFAFVPPTEYC..NGWACFVSVLITIGMLTAIIGDLASHFCGITGLKDSVTAVVVAFTGTSVPD  
 D.rerio\_NCX4a    TVFWKVLFAFVPPTEYW..NGWACFIVSITLIGVLTAVTGDLSHFCGTVGLKDSVTAVVVALGTSVPD  
 T.nigroviridis\_NCX4a TVFWKVLFAFVPPTEYW..NGWACFVSVLITIGVLTAVTGDLSHFCGTVGLKDSVTAVVVALGTSVPD  
 H.sapiens\_NCX2.1    TVFWKVLFAFVPPTEYC..HGWACFVSVLITIGLLTALIGDLASHFCGTVGLKDSVNNAVVALGTSIPD  
 R.norvegicus\_NCX2.1 TVFWKVLFAFVPPTEYC..HGWACFVSVLITIGLLTALIGDLASHFCGTVGLKDSVNNAVVALGTSIPD  
 M.musculus\_NCX2.1 TVFWKVLFAFVPPTEYC..NGWACFVSVLITIGVLTALIGDLASHFCGTVGLKDSVNNAVVALGTSIPD  
 S.skowalevskii\_3    SIFWKLILFAFVPPTDI..GGWACFVSVLITIGLLTAVIGDLASHFCGTVGLKDSVTAVVVALGTSVPD  
 T.adhaerens\_2    TIFWKLIFALVPPTEI..GGWACFVSVLITIGLLTAVIGDLASHFCGTVGLKDSVTAVVVALGTSVPD  
 L.opalescens\_NCX CLFWKVLFAFVPPTDYW..GGWACFVSVLITIGVLTAFIGDLATYFCGTVGLKDAVTAIVSVALGTSVPD  
 A.mellifera\_NCX    TILWKLFLFAFVPPTDIA..GGYLCFVSVIFGIVVAVIGDVASYFCGLGKDSVTAVVVALGTSIPD  
 D.melanogaster\_NCX CLFWKVLFAFVPPTDIC..GGYVTFVSVIFVIGVITAIIGDAAASYFCALNIDKSVTAVVVALGTSIPD  
 H.magnipapillata    SFFWKLFLFAFVPPTDI..GGWACFVSVLITIGLLTAVIGDLASHFCGTVGLKDSVTAVVVALGTSVPD  
 C.elegans\_NCX1    ALPWKLFLFALVPPTDYF..NGWCCFVVAIAMIGVLTAFIGDIAAAFCGTVGLKDSVTAVVVALGTSVPD  
 C.briggsae\_NCX1    ALPWKLFLFALVPPTDYF..NGWCCFVVAIAMIGVLTAFIGDIAAAFCGTVGLKDSVTAVVVALGTSVPD  
 C.elegans\_NCX2    TVPWKLTFATVPPTDYF..GGWATFVVAIFMIGVLTAVVGDLSAQFCGWVGLKDAVTAIVSVALGTSVPD  
 C.briggsae\_NCX2    TVPWKLTFATVPPTDYF..GGWATFVVAIFMIGVLTAVVGDLSAQFCGWVGLKDAVTAIVSVALGTSVPD  
 T.spiralis        AFPWKVIAAFVPPTTIF..GGWLAFFVALALIGLLTAIIGDLAAIFGLVGLKDSVTAVVVALGTSVPD  
 M.brevicollis\_1    TLPWKLVAACIPPTV..GGWLAFFVALALIGLLTAIIGDLAAIFGLVGLKDSVTAVVVALGTSVPD  
 Salpingoeca      NLPWKIIIAACIPPTL..GWWTFVGSALIMIGVLTAVIGDLAAIFGLVGLKDSVTAVVVALGTSVPD  
 S.skowalevskii\_1    TFGWKVIFALVPPPSFLNSGWIICFTVAISFGLLTAIIGDLAAIFGLVGLKDSVTAVVVALGTSVPD  
 S.skowalevskii\_2    SFGWKVIFALVPPPSFLNSGWIICFTVAISFGLLTAIIGDLAAIFGLVGLKDSVTAVVVALGTSVPD  
 T.adhaerens\_1    TFGWKVIFALVPPPSML..GGWLTAFIASLGMIGFLTAIIGDLAAIFGLVGLKDSVTAVVVALGTSVPD  
 D.pulex\_1        TFGWKLFLFALVPPAGI..GGWLSFVSVLVIGALTAIIGDLAAIFGLVGLKDSVTAVVVALGTSVPD  
 P.humanus\_corporis SFNWKVLFSFVPPPSMF..GGWLCFVSVLITIGVLTAVIEDIASLFCGTVGLKDSVTAVVVALGTSVPD  
 O.dioica         TFGFKTIFALVPPSNMG..GGWPCFVSVLITIGVLTAVIEDIASLFCGTVGLKDSVTAVVVALGTSVPD  
 A.pisum          SFFWKVVFVAFVPPAAVFS..GWLRFVSVLITIGVMTAVIGDLATIFGLVGLKDSVTAVVVALGMSLPD  
 P.marinus        TFPWKIVFAPCPLE..GWLRFVSVLITIGVMTAVIGDLATIFGLVGLKDSVTAVVVALGMSLPD  
 A.anophagefferens\_1 TLPWKAFAFVPPTSYG..GGWVCFVVALTIGVITAFIGDLAAIFGLVGLKDSVTAVVVALGTSVPD  
 E.huxleyi        ALPWRLFLFALVPPRVA..GGWACFVSVLITIGVITAFIGDLAAIFGLVGLKDSVTAVVVALGTSVPD  
 consensus>50    ...wklvlfafvpp.y....Gw..Fivsl..Ig.ltaiidla..fgC.iglkdsvtavt.valGts.p#

|                      | 420      | 430     | 440                     | 450    | 460       |
|----------------------|----------|---------|-------------------------|--------|-----------|
| A.thaliana           | LVASKIAA | ERQLT   | ADSAIANITCSNSVNIYV      | GIGVPL | INTVYNYF  |
| A.halleri            | LVASKIAA | ERQLT   | ADSAIANITCSNSVNIYV      | GIGVPL | INTVYNYF  |
| A.lyrata             | LVASKIAA | ERQLT   | ADSAIANITCSNSVNIYV      | GIGVPL | INTVYNYF  |
| C.sativus            | LVASKIAA | ERQTT   | ADSAIANITCSNSVNIYV      | GIGVPL | ISTTYNFI  |
| C.clementina         | LVASKIAA | ERQIT   | ADSAIANITCSNSVNIYV      | GIGVPL | LIDTAYNFI |
| R.communis           | LVASKIAA | ERQIT   | ADSAIANITCSNSVNIYV      | GIGVPL | LIDTAYNFI |
| M.esculenta          | LVASKIAA | ERQTT   | ADSAIANITCSNSVNIYV      | GIGVPL | LIDTAYNFI |
| P.trichocarpa        | LVASKIAA | ERQTT   | ADSAIANITCSNSVNIYV      | GIGVPL | LIDTAYNFI |
| P.persica            | LVASKIAA | ERQIT   | ADSAIANITCSNSVNIYV      | GIGVPL | LIDTAYNFI |
| C.papaya             | LVASKIAA | ERQIT   | ADSAIANITCSNSVNIYV      | GIGVPL | LIDTAYNFI |
| A.coerulea           | LVASKIAA | ERQTT   | ADSAIANITCSNSVNIYV      | GIGVPL | LIDTAYNFI |
| V.vinifera           | LVASKIAA | ERQTT   | ADSAIANITCSNSVNIYV      | GIGVPL | LIDTAYNFI |
| S.tuberosum          | LVASKIAA | ERQLT   | ADSAIANITCSNSVNIYV      | GIGVPL | INTVYNYF  |
| S.lycopersicum       | LVASKIAA | ERQLT   | ADSAIANITCSNSVNIYV      | GIGVPL | INTVYNYF  |
| M.guttatus_1         | LVASKIAA | ERQTT   | ADSAIANITCSNSVNIYV      | GIGVPL | INTVYNYF  |
| M.guttatus_2         | LVASKIAA | ERQIT   | ADSAIANITCSNSVNIYV      | GIGVPL | INTVYNYF  |
| G.max                | LVASKIAA | ERQKT   | ADSAIANITCSNSVNIYV      | GIGVPL | LIDTAYNFI |
| M.truncatula         | LVASKIAA | KRQKT   | ADSAIANITCSNSVNIYV      | GIGVPL | LIDTAYNFI |
| E.grandis            | LVASKIAA | ERQTT   | ADSAIANITCSNSVNIYV      | GIGVPL | INTVYNYF  |
| S.italica            | LVASKIAA | ERQVT   | ADSAIANITCSNSVNIYV      | GIGVPL | LIDTAYNFI |
| Z.mays               | LVASKIAA | ERQVT   | ADSAIANITCSNSVNIYV      | GIGVPL | LIDTAYNFI |
| S.bicolor            | LVASKIAA | ERQVT   | ADSAIANITCSNSVNIYV      | GIGVPL | LIDTAYNFI |
| T.aestivum           | LVASKIAA | ERQVT   | ADSAIANITCSNSVNIYV      | GIGVPL | INTVYNYF  |
| B.distachyon         | LVASKIAA | ERQVT   | ADSAIANITCSNSVNIYV      | GIGVPL | LIDTAYNFI |
| O.sativa_J1          | LVASKIAA | ERQIT   | ADSAITNITCSNSVNIYV      | GIGVPL | VDTMYNYF  |
| O.sativa_I1          | LVASKIAA | ERQIT   | ADSAITNITCSNSVNIYV      | GIGVPL | VDTMYNYF  |
| O.sativa_J2          | LVASKIAA | ERQIT   | ADSAIANITCSNSVNIYV      | GIGVPL | VDTMYNYF  |
| S.moellendorffii_1   | LMASKIAA | EYDPT   | ADSAIANINASNCINVV       | GFVPL  | CVSALYSTG |
| P.patens_1           | LASKIAA  | EIQPT   | ADSAIANINASNCINVV       | GIGVPL | MQSFYNWI  |
| P.patens_2           | LASKIAA  | KHLPT   | ADSAIANINASNCINVV       | GIGVPL | LQSFYNKL  |
| C.reinhardtii        | TLASRIAA | VKDPD   | ADAAIGNITGNSVNVFL       | GLGLPW | AVCSVYVHV |
| C.intestinalis       | TLASRTAA | LQDDY   | ADASIGNITGNSVNVFL       | GLGLPW | WIRTMVFAV |
| B.floridae           | TFASRTVA | IHDVH   | ADAAIGNVTGNSVNVFL       | GLGLPW | VISTMYHLI |
| T.adhaerens_3        | TFASRNAA | VHDHS   | ADASIGNVTGNSVNVFL       | GLGLPW | VLVTTYROI |
| N.vectensis_2        | TMASRSAA | LQDTG   | ADAAIGNITGNSVNVFL       | GLGLPW | VWMCYHAA  |
| H.sapiens_NCX1.1     | TFASKVAA | TQDQY   | ADASIGNVTGNSAVNVFL      | IGVAWS | IAIYHAA   |
| P.troglodytes_NCX1.1 | TFASKVAA | TQDQY   | ADASIGNVTGNSAVNVFL      | IGVAWS | IAIYHAA   |
| C.familiaris_NCX1.1  | TFASKVAA | TQDQY   | ADASIGNVTGNSAVNVFL      | IGVAWS | IAIYHAA   |
| F.catus_NCX1.1       | TFASKVAA | TQDQY   | ADASIGNVTGNSAVNVFL      | IGVAWS | IAIYHAA   |
| C.porcullus_NCX1.1   | TFASKVAA | TQDQY   | ADASIGNVTGNSAVNVFL      | IGVAWS | IAIYHAA   |
| B.taurus_NCX1.1      | TFASKVAA | TQDQY   | ADASIGNVTGNSAVNVFL      | IGVAWS | IAIYHAA   |
| R.norvegicus_NCX1.1  | TFASKVAA | TQDQY   | ADASIGNVTGNSAVNVFL      | IGVAWS | IAIYHAA   |
| M.musculus_NCX1.1    | TFASKVAA | TQDQY   | ADASIGNVTGNSAVNVFL      | IGVAWS | IAIYHAA   |
| M.mulatta_NCX1.3     | TFASKVAA | TQDQY   | ADASIGNVTGNSAVNVFL      | IGVAWS | IAIYHAA   |
| O.cuniculus_NCX1.2   | TFASKVAA | TQDQY   | ADASIGNVTGNSAVNVFL      | IGVAWS | IAIYHAA   |
| S.tropicalis_NCX1    | TFASKVAA | TQDQY   | ADASIGNVTGNSAVNVFL      | IGVAWS | IAIYHAA   |
| O.mossambicus_NCX1.1 | TFASKVAA | IQDQY   | ADASIGNVTGNSAVNVFL      | IGVAWS | IAAVYHYT  |
| O.mykiss_NCX1        | TFASKVAA | IQDQY   | ADAFIGNVTGNSAVNVFL      | IGVAWS | IAIYHNS   |
| D.rerio_NCX1a        | TFASKVAA | IQDQY   | ADASIGNVTGNSAVNVFL      | IGVAWS | IAIYHQS   |
| H.sapiens_NCX3.3     | TFASKAAA | LQDVY   | ADASIGNVTGNSAVNVFL      | IGLAW  | SVAAIYWAL |
| R.norvegicus_NCX3.3  | TFASKAAA | LQDVY   | ADASIGNVTGNSAVNVFL      | IGLAW  | SVAAIYWAM |
| M.musculus_NCX3.1    | TFASKAAA | LQDVY   | ADASIGNVTGNSAVNVFL      | IGLAW  | SVAAIYWAM |
| G.gallus_NCX3        | TFASKAAA | IQDVY   | ADASITNVVTGNSAVNVFL     | IGLAW  | SVAAIYWAS |
| D.rerio_NCX4a        | TFASKVAA | IQDQY   | ADASIGNVTGNSAVNVFL      | IGVAWS | IAAVYWHS  |
| T.nigroviridis_NCX4a | TFASKVAA | IQDQY   | ADASIGNVTGNSAVNVFL      | IGVAWS | IAAVYWHS  |
| H.sapiens_NCX2.1     | TFASKVAA | LQDQC   | ADASIGNVTGNSAVNVFL      | IGLAW  | SVAAVYWAV |
| R.norvegicus_NCX2.1  | TFASKVAA | LQDQC   | ADASIGNVTGNSAVNVFL      | IGLAW  | SVAAVYWAV |
| M.musculus_NCX2.1    | TFASKVAA | LQDQC   | ADASIGNVTGNSAVNVFL      | IGLAW  | SVAAVYWAV |
| S.skowalevskii_3     | TFASKTAA | VGDQY   | ADASVGNVTGNSAVNVFL      | IGLAW  | SAAAIYWAA |
| T.adhaerens_2        | TFASKTAA | VNDKY   | ADSSIGNVTGNSVNVFL       | GLGLAW | CVAAVANAI |
| L.opalescens_NCX     | TFASKVAA | INDKY   | ADSSIGNVTGNSAVNVFL      | IGLAW  | SAAAIYHAA |
| A.mellifera_NCX      | TFASKVAA | CQDKY   | ADASVGNVTGNSAVNVFL      | IGVAWS | IAIYHAL   |
| D.melanogaster_NCX   | TFASMIAA | KHDEG   | ADNCIGNVTGNSAVNVFL      | IGLAW  | TIAAVYHSS |
| H.magnipapillata     | TFASKVAT | INDEH   | ADGSSIGNVTGNSVNVFL      | IGLAW  | SAAAIYHAS |
| C.elegans_NCX1       | TFASRTAA | VGDQW   | ADGSSIGNVTGNSAVNVFL     | IGLAW  | MIAAVYHAY |
| C.briggsae_NCX1      | TFASRTAA | VGDQW   | ADGSSIGNVTGNSAVNVFL     | IGLAW  | MIAAVYHAY |
| C.elegans_NCX2       | TFASKVSA | VQDKY   | ADNAVGNVTGNSAVNVFL      | IGLAW  | SMAAIYHWN |
| C.briggsae_NCX2      | TFASKVSA | VQDKY   | ADNAVGNVTGNSAVNVFL      | IGLAW  | SMAAIYHWN |
| T.spiralis           | TFASRLAA | LQDKT   | ADNAIGNITGNSVNVFL       | GLGLPW | FIAVYVWAA |
| M.brevicollis_1      | TFASRSAT | LASKT   | ADAAVTNVVTGNSVNVFL      | GLGLPW | FIAVYVWPA |
| Salpingoeca          | TFASMSAT | LASDT   | ADAAITNVVTGNSVNVFL      | GLGLPW | FIAVYVWPA |
| S.skowalevskii_1     | LFASKTAA | VNEKY   | ADASIGNVTGNSVNVFL       | GLGLPW | LIAIYVWTS |
| S.skowalevskii_2     | LCVSKKAS | VGEKY   | ADCCM...TGSYSVYVFP      | GLGLPW | LIAIYVWTS |
| T.adhaerens_1        | LFASKTAA | LNKEY   | ADNSIGNVTGNSVNVFL       | GLGLPW | LIAIYVWTS |
| D.pulex_1            | LFASRAAA | MNEKY   | ADNAIGNVTGNSVNVFL       | GLGLPW | LIAIYVWTS |
| P.humanus_corporis   | TFASRTAA | LKEYQ   | ADTSIGNITGNSVNVFL       | GLGLPW | LMAIYVHTH |
| O.dioica             | LFASKIAA | TNEPN   | ADDAVGNVTGNSVNVFL       | GLGLPW | SMAAIYHYC |
| A.pisum              | ILGACMVT | RAETH   | ADAMIHIAIGSIAVKVLM      | GVGLPW | FISALYHYS |
| P.marinus            | TFASRLAA | MQDPY   | ADASIGNVTGNSVNVFL       | GLGLPW | VIGSLYWS  |
| A.anophagefferens_1  | AFASKAAT | INDDS   | ADAAVGNVTGNSVNVFL       | GLGLPW | SIAAIYWS  |
| E.huxleyi            | TFASRTAA | VKERERH | ADSSIGNITGNSVNVFL       | GLGLPW | LAAALF    |
| consensus>50         | tfaskiaa | .d....  | AD.aignvtgnsn!nflGigvpw | .ia.iy | .....     |

|                      | 470    | 480     | 490  | 500  | 510  | 520 | 530   |     |     |      |         |         |       |      |      |     |     |    |     |    |    |    |    |    |         |         |       |   |   |   |   |   |     |         |         |   |   |   |   |   |   |   |   |   |   |   |   |   |   |   |   |   |   |   |   |   |   |
|----------------------|--------|---------|------|------|------|-----|-------|-----|-----|------|---------|---------|-------|------|------|-----|-----|----|-----|----|----|----|----|----|---------|---------|-------|---|---|---|---|---|-----|---------|---------|---|---|---|---|---|---|---|---|---|---|---|---|---|---|---|---|---|---|---|---|---|---|
| A.thaliana           | YREPL  | YIENAK  | GLS  | FSL  | LIFF | FAT | SVG   | CIV | VLV | LR   | ...LIIG | AELGG   | PL    | LWAW | L    | SAY | FMM | LW | VV  | FV | LS |    |    |    |         |         |       |   |   |   |   |   |     |         |         |   |   |   |   |   |   |   |   |   |   |   |   |   |   |   |   |   |   |   |   |   |   |
| A.halleri            | YREPL  | YIENAK  | GLS  | FSL  | LIFF | FAT | SVG   | CIV | VLV | LR   | ...LIIG | AELGG   | PL    | LWAW | L    | SAY | FMM | LW | VV  | FV | LS |    |    |    |         |         |       |   |   |   |   |   |     |         |         |   |   |   |   |   |   |   |   |   |   |   |   |   |   |   |   |   |   |   |   |   |   |
| A.lyrata             | YREPL  | YIENAK  | GLS  | FSL  | LIFF | FAT | SVG   | CIV | VLV | LR   | ...LIIG | AELGG   | PL    | LWAW | L    | SAY | FMM | LW | VV  | FV | LS |    |    |    |         |         |       |   |   |   |   |   |     |         |         |   |   |   |   |   |   |   |   |   |   |   |   |   |   |   |   |   |   |   |   |   |   |
| C.sativus            | YKPL   | KIKDAG  | GLS  | FSL  | LIFF | FAT | SVG   | CIV | VLV | LR   | ...VTLG | AELGG   | PK    | LWAW | L    | CI  | F   | FM | LW  | VV | FV | LS |    |    |         |         |       |   |   |   |   |   |     |         |         |   |   |   |   |   |   |   |   |   |   |   |   |   |   |   |   |   |   |   |   |   |   |
| C.clementina         | YKPL   | RVQNAEG | GLS  | FSL  | LIFF | FAT | SVG   | CIV | VLV | LR   | ...LTLG | AELGG   | PK    | LWAW | L    | SV  | F   | FM | LW  | VV | FV | LS |    |    |         |         |       |   |   |   |   |   |     |         |         |   |   |   |   |   |   |   |   |   |   |   |   |   |   |   |   |   |   |   |   |   |   |
| R.communis           | YREPL  | RVQDAA  | GLS  | FSL  | LIFF | FAT | SVG   | CIV | VLV | LR   | ...LTLG | AELGG   | PK    | LWAW | L    | SV  | F   | FM | LW  | VV | FV | LS |    |    |         |         |       |   |   |   |   |   |     |         |         |   |   |   |   |   |   |   |   |   |   |   |   |   |   |   |   |   |   |   |   |   |   |
| M.esculenta          | YRQPL  | RIENAE  | GLS  | FSL  | LIFF | FAT | SVG   | CIV | VLV | LR   | ...LTLG | AELGG   | PK    | LWAW | L    | CV  | F   | FM | LW  | VV | FV | LS |    |    |         |         |       |   |   |   |   |   |     |         |         |   |   |   |   |   |   |   |   |   |   |   |   |   |   |   |   |   |   |   |   |   |   |
| P.trichocarpa        | YNEPL  | RIQNAAG | GLS  | FSL  | LIFF | FAT | SVG   | CIV | VLV | LR   | ...LTLG | AELGG   | PK    | LWAW | L    | CV  | F   | FM | LW  | VV | FV | LS |    |    |         |         |       |   |   |   |   |   |     |         |         |   |   |   |   |   |   |   |   |   |   |   |   |   |   |   |   |   |   |   |   |   |   |
| P.persica            | YKPL   | RIENAE  | GLS  | FSL  | LIFF | FAT | SVG   | CIV | VLV | LR   | ...RTL  | AELGG   | PK    | LWAW | L    | FV  | F   | FM | LW  | VV | FV | LS |    |    |         |         |       |   |   |   |   |   |     |         |         |   |   |   |   |   |   |   |   |   |   |   |   |   |   |   |   |   |   |   |   |   |   |
| C.papaya             | YREPL  | GIQNAEG | GLS  | FSL  | LIFF | FAT | SVG   | CIV | VLV | LR   | ...LTLG | AELGG   | PK    | LWAW | L    | SV  | F   | FM | LW  | VV | FV | LS |    |    |         |         |       |   |   |   |   |   |     |         |         |   |   |   |   |   |   |   |   |   |   |   |   |   |   |   |   |   |   |   |   |   |   |
| A.coerulea           | YREPL  | RIENAD  | GLS  | FSL  | LIFF | FAT | SVG   | CIV | VLV | LR   | ...LTLG | AELGG   | PK    | LWAW | L    | SV  | F   | FM | LW  | VV | FV | LS |    |    |         |         |       |   |   |   |   |   |     |         |         |   |   |   |   |   |   |   |   |   |   |   |   |   |   |   |   |   |   |   |   |   |   |
| V.vinifera           | YREPL  | GVQNAEG | GLS  | FSL  | LIFF | FAT | SVG   | CIV | VLV | LR   | ...LTLG | AELGG   | PK    | LWAW | L    | CV  | F   | FM | LW  | VV | FV | LS |    |    |         |         |       |   |   |   |   |   |     |         |         |   |   |   |   |   |   |   |   |   |   |   |   |   |   |   |   |   |   |   |   |   |   |
| S.tuberosum          | YNEPL  | RIQNAAG | GLS  | FSL  | LIFF | FAT | SVG   | CIV | VLV | LR   | ...LTLG | AELGG   | PK    | LWAW | L    | CV  | F   | FM | LW  | VV | FV | LS |    |    |         |         |       |   |   |   |   |   |     |         |         |   |   |   |   |   |   |   |   |   |   |   |   |   |   |   |   |   |   |   |   |   |   |
| S.lycopersicum       | YNEPL  | RIENAE  | GLS  | FSL  | LIFF | FAT | SVG   | CIV | VLV | LR   | ...LTLG | AELGG   | PK    | LWAW | L    | CV  | F   | FM | LW  | VV | FV | LS |    |    |         |         |       |   |   |   |   |   |     |         |         |   |   |   |   |   |   |   |   |   |   |   |   |   |   |   |   |   |   |   |   |   |   |
| M.guttatus_1         | YNEPL  | RIENAG  | GLS  | FSL  | LIFF | FAT | SVG   | CIV | VLV | LR   | ...LTLG | AELGG   | PK    | LWAW | L    | CV  | F   | FM | LW  | VV | FV | LS |    |    |         |         |       |   |   |   |   |   |     |         |         |   |   |   |   |   |   |   |   |   |   |   |   |   |   |   |   |   |   |   |   |   |   |
| M.guttatus_2         | YKPL   | RIENAE  | GLS  | FSL  | LIFF | FAT | SVG   | CIV | VLV | LR   | ...LTLG | AELGG   | PK    | LWAW | L    | CV  | F   | FM | LW  | VV | FV | LS |    |    |         |         |       |   |   |   |   |   |     |         |         |   |   |   |   |   |   |   |   |   |   |   |   |   |   |   |   |   |   |   |   |   |   |
| G.max                | YREPL  | RIQNAAG | GLS  | FSL  | LIFF | FAT | SVG   | CIV | VLV | LR   | ...LTLG | AELGG   | PK    | LWAW | L    | CV  | F   | FM | LW  | VV | FV | LS |    |    |         |         |       |   |   |   |   |   |     |         |         |   |   |   |   |   |   |   |   |   |   |   |   |   |   |   |   |   |   |   |   |   |   |
| M.truncatula         | YRQPL  | RIQNAAG | GLS  | FSL  | LIFF | FAT | SVG   | CIV | VLV | LR   | ...LTLG | AELGG   | PK    | LWAW | L    | CV  | F   | FM | LW  | VV | FV | LS |    |    |         |         |       |   |   |   |   |   |     |         |         |   |   |   |   |   |   |   |   |   |   |   |   |   |   |   |   |   |   |   |   |   |   |
| E.grandis            | YREPL  | RIQNAAG | GLS  | FSL  | LIFF | FAT | SVG   | CIV | VLV | LR   | ...LTLG | AELGG   | PK    | LWAW | L    | CV  | F   | FM | LW  | VV | FV | LS |    |    |         |         |       |   |   |   |   |   |     |         |         |   |   |   |   |   |   |   |   |   |   |   |   |   |   |   |   |   |   |   |   |   |   |
| S.italica            | YREPL  | RIQNAAG | GLS  | FSL  | LIFF | FAT | SVG   | CIV | VLV | LR   | ...LTLG | AELGG   | PK    | LWAW | L    | CV  | F   | FM | LW  | VV | FV | LS |    |    |         |         |       |   |   |   |   |   |     |         |         |   |   |   |   |   |   |   |   |   |   |   |   |   |   |   |   |   |   |   |   |   |   |
| Z.mays               | YREPL  | RIQNAAG | GLS  | FSL  | LIFF | FAT | SVG   | CIV | VLV | LR   | ...LTLG | AELGG   | PK    | LWAW | L    | CV  | F   | FM | LW  | VV | FV | LS |    |    |         |         |       |   |   |   |   |   |     |         |         |   |   |   |   |   |   |   |   |   |   |   |   |   |   |   |   |   |   |   |   |   |   |
| S.bicolor            | YQEP   | LIQNAAG | GLS  | FSL  | LIFF | FAT | SVG   | CIV | VLV | LR   | ...LTLG | AELGG   | PK    | LWAW | L    | CV  | F   | FM | LW  | VV | FV | LS |    |    |         |         |       |   |   |   |   |   |     |         |         |   |   |   |   |   |   |   |   |   |   |   |   |   |   |   |   |   |   |   |   |   |   |
| T.aestivus           | YQEP   | LIQNAAG | GLS  | FSL  | LIFF | FAT | SVG   | CIV | VLV | LR   | ...LTLG | AELGG   | PK    | LWAW | L    | CV  | F   | FM | LW  | VV | FV | LS |    |    |         |         |       |   |   |   |   |   |     |         |         |   |   |   |   |   |   |   |   |   |   |   |   |   |   |   |   |   |   |   |   |   |   |
| B.distachyon         | YQEP   | LIQNAAG | GLS  | FSL  | LIFF | FAT | SVG   | CIV | VLV | LR   | ...LTLG | AELGG   | PK    | LWAW | L    | CV  | F   | FM | LW  | VV | FV | LS |    |    |         |         |       |   |   |   |   |   |     |         |         |   |   |   |   |   |   |   |   |   |   |   |   |   |   |   |   |   |   |   |   |   |   |
| O.sativa_J1          | YQKPL  | YIDNAAG | GLS  | FSL  | LIFF | FAT | SVG   | CIV | VLV | LR   | ...VILG | AELGG   | PK    | LWAW | L    | SV  | F   | FM | LW  | VV | FV | LS |    |    |         |         |       |   |   |   |   |   |     |         |         |   |   |   |   |   |   |   |   |   |   |   |   |   |   |   |   |   |   |   |   |   |   |
| O.sativa_J1          | YQKPL  | YIDNAAG | GLS  | FSL  | LIFF | FAT | SVG   | CIV | VLV | LR   | ...VILG | AELGG   | PK    | LWAW | L    | SV  | F   | FM | LW  | VV | FV | LS |    |    |         |         |       |   |   |   |   |   |     |         |         |   |   |   |   |   |   |   |   |   |   |   |   |   |   |   |   |   |   |   |   |   |   |
| O.sativa_J2          | YKPL   | YIDNAAG | GLS  | FSL  | LIFF | FAT | SVG   | CIV | VLV | LR   | ...VILG | AELGG   | PK    | LWAW | L    | SV  | F   | FM | LW  | VV | FV | LS |    |    |         |         |       |   |   |   |   |   |     |         |         |   |   |   |   |   |   |   |   |   |   |   |   |   |   |   |   |   |   |   |   |   |   |
| S.moellendorffii_1   | HQNLV  | .VPE    | .GLK | FLLS | VYF  | FST | AIT   | CF  | VAL | TARR | ...RLLG | GELGG   | PK    | KWAW | S    | AI  | F   | F  | LW  | LI | F  | LS |    |    |         |         |       |   |   |   |   |   |     |         |         |   |   |   |   |   |   |   |   |   |   |   |   |   |   |   |   |   |   |   |   |   |   |
| P.patens_1           | LKEE   | FRVPSA  | .GLG | FALV | LVF  | FT  | FAI   | CL  | V   | I    | ARR     | ...FLFG | GELGG | PK   | KWAW | S   | AI  | F  | F   | LW | LI | F  | LS |    |         |         |       |   |   |   |   |   |     |         |         |   |   |   |   |   |   |   |   |   |   |   |   |   |   |   |   |   |   |   |   |   |   |
| P.patens_2           | LDEE   | FRVPSV  | .GIG | FSLM | LFL  | V   | FVL   | C   | I   | V    | VGR     | ...FIFE | GELGG | PK   | KWAW | S   | AI  | F  | F   | LW | LI | F  | LS |    |         |         |       |   |   |   |   |   |     |         |         |   |   |   |   |   |   |   |   |   |   |   |   |   |   |   |   |   |   |   |   |   |   |
| C.reinhardtii        | GEK    | ..YV    | TPG  | DL   | E    | F   | AVMLY | A   | I   | L    | G       | CG      | F     | I    | L    | AV  | A   | R  | ..Y | F  | G  | G  | E  | L  | G       | G       | T     | K | R | Q | Y | S | I   | A       | G       | L | L | T | L | W | L | L | Y | I | F | S |   |   |   |   |   |   |   |   |   |   |   |
| C.intestinalis       | GGQ    | ..YI    | VD   | T    | D    | G   | L     | D   | F   | A    | V       | L       | F     | D    | S    | F   | G   | A  | V   | C  | V  | L  | L  | RR | ...YVLG | GELGG   | ST    | R | V | K | W | A | S   | G       | I       | F | L | T | L | W | F | I | I | V | S |   |   |   |   |   |   |   |   |   |   |   |   |
| B.floridae           | GTQ    | ..YR    | V    | L    | P    | G   | N     | L   | R   | F    | A       | V       | F     | T    | F    | L   | A   | V  | G   | S  | L  | L  | M  | F  | RR      | ...KCFG | GELGG | K | K | V | P | K | W   | S       | A       | L | L | M | F | S | P | V | V | F | I | V | L | C |   |   |   |   |   |   |   |   |   |
| T.adhaerens_3        | FNSND  | Y       | A    | I    | S    | P   | G     | D   | M   | Q    | F       | S       | V     | L    | F    | T   | V   | V  | A   | G  | A  | V  | I  | L  | RR      | ...FVLG | GELGG | D | I | K | W | Y | T   | A       | A       | T | L | V | L | L | W | A | V | I | T | L | S |   |   |   |   |   |   |   |   |   |   |
| N.vectensis_2        | GTV    | ..YK    | V    | S    | S    | G   | N     | L   | A   | F    | S       | V       | L     | F    | A    | L   | C   | G  | V   | F  | L  | L  | V  | LR | ...YLYK | GELGG   | P     | T | L | S | K | W | M   | T       | G       | L | L | L | F | W | L | L | Y | I | V | V | L | S |   |   |   |   |   |   |   |   |   |
| H.sapiens_NCX1.1     | ..NGEQ | F       | K    | V    | S    | P   | G     | T   | L   | A    | F       | S       | V     | L    | F    | T   | I   | F  | A   | F  | I  | N  | V  | G  | V       | L       | L     | Y | R | R | P | E | I   | ..G     | ..GELGG | P | T | A | K | L | L | T | S | C | L | F | V | L | L | W | L | L | Y | I | F | F | S |
| P.troglodytes_NCX1.1 | ..NGEQ | F       | K    | V    | S    | P   | G     | T   | L   | A    | F       | S       | V     | L    | F    | T   | I   | F  | A   | F  | I  | N  | V  | G  | V       | L       | L     | Y | R | R | P | E | I   | ..G     | ..GELGG | P | T | A | K | L | L | T | S | C | L | F | V | L | L | W | L | L | Y | I | F | F | S |
| C.familiaris_NCX1.1  | ..NGEQ | F       | K    | V    | S    | P   | G     | T   | L   | A    | F       | S       | V     | L    | F    | T   | I   | F  | A   | F  | I  | N  | V  | G  | V       | L       | L     | Y | R | R | P | E | I   | ..G     | ..GELGG | P | T | A | K | L | L | T | S | C | L | F | V | L | L | W | L | L | Y | I | F | F | S |
| F.catus_NCX1.1       | ..NGEQ | F       | K    | V    | S    | P   | G     | T   | L   | A    | F       | S       | V     | L    | F    | T   | I   | F  | A   | F  | I  | N  | V  | G  | V       | L       | L     | Y | R | R | P | E | I   | ..G     | ..GELGG | P | T | A | K | L | L | T | S | C | L | F | V | L | L | W | L | L | Y | I | F | F | S |
| C.porcullus_NCX1.1   | ..NGEQ | F       | K    | V    | S    | P   | G     | T   | L   | A    | F       | S       | V     | L    | F    | T   | I   | F  | A   | F  | I  | N  | V  | G  | V       | L       | L     | Y | R | R | P | E | I   | ..G     | ..GELGG | P | T | A | K | L | L | T | S | C | L | F | V | L | L | W | L | L | Y | I | F | F | S |
| B.taurus_NCX1.1      | ..NGEQ | F       | K    | V    | S    | P   | G     | T   | L   | A    | F       | S       | V     | L    | F    | T   | I   | F  | A   | F  | I  | N  | V  | G  | V       | L       | L     | Y | R | R | P | E | I   | ..G     | ..GELGG | P | T | A | K | L | L | T | S | C | L | F | V | L | L | W | L | L | Y | I | F | F | S |
| R.norvegicus_NCX1.1  | ..NGEQ | F       | K    | V    | S    | P   | G     | T   | L   | A    | F       | S       | V     | L    | F    | T   | I   | F  | A   | F  | I  | N  | V  | G  | V       | L       | L     | Y | R | R | P | E | I   | ..G     | ..GELGG | P | T | A | K | L | L | T | S | C | L | F | V | L | L | W | L | L | Y | I | F | F | S |
| M.musculus_NCX1.1    | ..NGEQ | F       | K    | V    | S    | P   | G     | T   | L   | A    | F       | S       | V     | L    | F    | T   | I   | F  | A   | F  | I  | N  | V  | G  | V       | L       | L     | Y | R | R | P | E | I   | ..G     | ..GELGG | P | T | A | K | L | L | T | S | C | L | F | V | L | L | W | L | L | Y | I | F | F | S |
| M.mulatta_NCX1.3     | ..NGEQ | F       | K    | V    | S    | P   | G     | T   | L   | A    | F       | S       | V     | L    | F    | T   | I   | F  | A   | F  | I  | N  | V  | G  | V       | L       | L     | Y | R | R | P | E | I   | ..G     | ..GELGG | P | T | A | K | L | L | T | S | C | L | F | V | L | L | W | L | L | Y | I | F | F | S |
| O.cuniculus_NCX1.2   | ..NGEQ | F       | K    | V    | S    | P   | G     | T   | L   | A    | F       | S       | V     | L    | F    | T   | I   | F  | A   | F  | I  | N  | V  | G  | V       | L       | L     | Y | R | R | P | E | I   | ..G     | ..GELGG | P | T | A | K | L | L | T | S | C | L | F | V | L | L | W | L | L | Y | I | F | F | S |
| S.tropicalis_NCX1    | ..NGDV | F       | R    | V    | O    | P   | G     | T   | L   | A    | F       | S       | V     | L    | F    | T   | I   | F  | A   | F  | I  | N  | V  | G  | V       | L       | L     | Y | R | R | P | E | I   | ..G     | ..GELGG | P | T | A | K | L | L | T | T | A | L | F | T | L | L | W | L | L | Y | I | F | F | S |
| O.mossambicus_NCX1.1 | ..QGQE | F       | K    | V    | N    | P   | G     | T   | L   | A    | F       | S       | V     | L    | F    | T   | I   | F  | A   | F  | I  | N  | V  | G  | V       | L       | L     | Y | R | R | P | E | I   | ..G     | ..GELGG | P | T | A | K | L | L | T | T | C | L | F | S | L | W | L | Y | I | F | F | S |   |   |
| O.mykiss_NCX1        | ..KQND | F       | R    | V    | D    | P   | G     | T   | L   | A    | F       | S       | V     | L    | F    | T   | I   | F  | A   | F  | V  | A  | V  | A  | L       | M       | Y     | R | R | P | E | I | ..G | ..GELGG | P       | T | A | K | L | L | T | C | L | F | S | L | W | L | Y | I | F | F | S |   |   |   |   |
| D.rerio_NCX1a        | ..QGRQ | F       | R    | V    | D    | P   | G     | T   | L   | A    | F       | S       | V     | L    | F    | T   | I   | F  | A   | F  | V  | C  | I  | A  | V       | L       | M     | Y | R | R | P | E | I   | ..G     | ..GELGG | P | T | A | K | L | L | T | T | T | L | F | S | L | W | L | Y | I | F | F | S |   |   |
| H.sapiens_NCX3.3     | ..QGQE | F       | H    | V    | S    | A   | G     | T   | L   | A    | F       | S       | V     | L    | F    | T   | I   | F  | A   | F  | V  | C  | I  | S  | V       | L       | L     | Y | R | R | P | H | L   | ..G     | ..GELGG | P | T | A | K | L | L | T | T | W | L | F | S | L | W | L | Y | I | F | F | S |   |   |
| R.norvegicus_NCX3.3  | ..QGQE | F       | H    | V    | S    | A   | G     | T   | L   | A    | F       | S       | V     | L    | F    | T   | I   | F  | A   | F  | V  | C  | I  | S  | V       | L       | L     | Y | R | R | P | H | L   | ..G     | ..GELGG | P | T | A | K | L | L | T | T | W | L | F | S | L | W | L | Y | I | F | F | S |   |   |
| M.musculus_NCX3.1    | ..QGQE | F       | H    | V    | S    | A   | G     | T   | L   | A    | F       | S       | V     | L    | F    | T   | I   | F  | A   | F  | V  | C  | I  | S  | V       | L       | L     | Y | R | R | P | H | L   | ..G     | ..GELGG | P | T | A | K | L | L | T | T | W | L | F | S | L | W | L | Y | I | F | F | S |   |   |
| G.gallus_NCX3        | ..QGQE | F       | H    | V    | S    | A   | G     | T   | L   | A    | F       | S       | V     | L    | F    | T   | I   | F  | A   | F  | V  | C  | I  | S  | V       | L       | L     | Y | R | R | P | H | L   | ..G     | ..GELGG | P | T | A | K | L | L | T | T | W | L | F | S | L | W | L | Y | I | F | F | S |   |   |
| D.rerio_NCX4a        | ..QGKK | F       | Q    | V    | P    | P   | G     | T   | L   | A    | F       | S       | V     | L    | F    | T   | I   | L  | A   | L  | V  | C  | V  | T  | L       | L       | Y     | R | R | P | S | V | S   | ..G     | ..GELGG | P | T | A | K | L | L | T | A | F | L | F | I | S | L | W | L | Y | I | F | F | S |   |
| T.nigroviridis_NCX4a | ..KQK  | F       | K    | V    | N    | P   | G     | T   | L   | A    | F       | S       | V     | L    | F    | T   | I   | M  | A   | L  | V  | C  | V  | T  | L       | L       | Y     | R | R | P | S | V | S   | ..G     | ..GELGG | P | T | A | K | L | L | T | F | F | L | I | S | L | W | L | Y | I | F | F | S |   |   |
| H.sapiens_NCX2.1     | ..QGRP | F       | E    | V    | R    | T</ |       |     |     |      |         |         |       |      |      |     |     |    |     |    |    |    |    |    |         |         |       |   |   |   |   |   |     |         |         |   |   |   |   |   |   |   |   |   |   |   |   |   |   |   |   |   |   |   |   |   |   |

|                      |       |            |                     |       |
|----------------------|-------|------------|---------------------|-------|
| A.thaliana           | SLKVS | SGV        | I                   | ..... |
| A.halleri            | SLKVS | SGV        | I                   | ..... |
| A.lyrata             | SLKVS | SGI        | I                   | ..... |
| C.sativus            | SLKVS | SDI        | I                   | ..... |
| C.clementina         | SLKVS | SGI        | I                   | ..... |
| R.communis           | SLRV  | SGI        | I                   | ..... |
| M.esculenta          | SLRV  | SGF        | I                   | ..... |
| P.trichocarpa        | SLRV  | SGI        | I                   | ..... |
| P.persica            | SLKVS | SGI        | I                   | ..... |
| C.papaya             | SLRV  | SGI        | I                   | ..... |
| A.coerulea           | SLKVS | SDI        | I                   | ..... |
| V.vinifera           | SLKI  | YGI        | I                   | ..... |
| S.tuberosum          | SLRV  | SGI        | I                   | ..... |
| S.lycopersicum       | SLRV  | SGI        | I                   | ..... |
| M.guttatus_1         | SLRV  | SGF        | I                   | ..... |
| M.guttatus_2         | SLQV  | SNI        | I                   | ..... |
| G.max                | SLKVS | SGF        | I                   | ..... |
| M.truncatula         | SLKVS | SGF        | I                   | ..... |
| E.grandis            | SLKVS | SGI        | I                   | ..... |
| S.italica            | SLKV  | YGI        | I                   | ..... |
| Z.mays               | SLRV  | SGV        | I                   | ..... |
| S.bicolor            | SLRV  | SGV        | I                   | ..... |
| T.aestivum           | SLRV  | SGV        | I                   | ..... |
| B.distachyon         | SLRV  | SGV        | I                   | ..... |
| O.sativa_J1          | SLKI  | SGV        | I                   | ..... |
| O.sativa_I1          | SLKI  | SGV        | I                   | ..... |
| O.sativa_J2          | SLRI  | SGV        | I                   | ..... |
| S.moellendorffii_1   | CLAG  | RFT        | .                   | ..... |
| P.patens_1           | CLRN  | YHHL       | .                   | ..... |
| P.patens_2           | CLRN  | YNLL       | .                   | ..... |
| C.reinhardtii        | GLRA  | YGN        | I                   | ..... |
| C.intestinalis       | SLKA  | YNY        | F                   | ..... |
| B.floridae           | SLKA  | YDL        | LPF                 | ..... |
| T.adhaerens_3        | SLRA  | YDVI       | RFQ                 | ..... |
| N.vectensis_2        | SLMA  | YGH        | ISGSL               | ..... |
| H.sapiens_NCX1.1     | SLEA  | YCHI       | KGF                 | ..... |
| P.troglodytes_NCX1.1 | SLEA  | YCHI       | KGF                 | ..... |
| C.familiaris_NCX1.1  | SLEA  | YCHI       | KGF                 | ..... |
| F.catus_NCX1.1       | SLEA  | YCHI       | KGF                 | ..... |
| C.porcullus_NCX1.1   | SLEA  | YCHI       | KGF                 | ..... |
| B.taurus_NCX1.1      | SLEA  | YCHI       | KGF                 | ..... |
| R.norvegicus_NCX1.1  | SLEA  | YCHI       | KGF                 | ..... |
| M.musculus_NCX1.1    | SLEA  | YCHI       | KGF                 | ..... |
| M.mulatta_NCX1.3     | SLEA  | YCHI       | KGF                 | ..... |
| O.cuniculus_NCX1.2   | SLEA  | YCHI       | KGF                 | ..... |
| S.tropicalis_NCX1    | SLEA  | YCHI       | KGF                 | ..... |
| O.mossambicus_NCX1.1 | SLEA  | YCHV       | KGF                 | ..... |
| O.mykiss_NCX1        | SLEA  | YCHV       | KGF                 | ..... |
| D.rerio_NCX1a        | SMEA  | YCI        | KGF                 | ..... |
| H.sapiens_NCX3.3     | TLEA  | YCY        | KGF                 | ..... |
| R.norvegicus_NCX3.3  | TLEA  | YCY        | KGF                 | ..... |
| M.musculus_NCX3.1    | TLEA  | YCY        | KGF                 | ..... |
| G.gallus_NCX3        | TLEA  | YCY        | KGF                 | ..... |
| D.rerio_NCX4a        | SLEA  | YCHV       | PGF                 | ..... |
| T.nigroviridis_NCX4a | SLEA  | YCHV       | HSF                 | ..... |
| H.sapiens_NCX2.1     | SLEA  | YCH        | IRGF                | ..... |
| R.norvegicus_NCX2.1  | SLEA  | YCH        | IRGF                | ..... |
| M.musculus_NCX2.1    | SLEA  | YCH        | IRGF                | ..... |
| S.kowalevskii_3      | SFE   | SYCY       | IEGF                | ..... |
| T.adhaerens_2        | SLE   | SYCHI      | PGF                 | ..... |
| L.opalescens_NCX     | GLMS  | YCHI       | PGF                 | ..... |
| A.mellifera_NCX      | I     | LEAYGY     | IEGF                | ..... |
| D.melanogaster_NCX   | I     | LEAYDV     | IRV                 | ..... |
| H.magnipapillata     | GLE   | SYCYF      | TLKF                | ..... |
| C.elegans_NCX1       | T     | LEAYCI     | IKGF                | ..... |
| C.briggsae_NCX1      | T     | LEAYCV     | IKGF                | ..... |
| C.elegans_NCX2       | A     | LEAYCI     | IPGF                | ..... |
| C.briggsae_NCX2      | A     | LEAYCI     | IPGF                | ..... |
| T.spiralis           | A     | LQAYGH     | ISSF                | ..... |
| M.brevicollis_1      | S     | LQVEGY     | IASI                | ..... |
| Salpingoeca          | S     | LSTYEH     | ISL                 | ..... |
| S.kowalevskii_1      | S     | LQAYGY     | IHF                 | ..... |
| S.kowalevskii_2      | S     | FQSYDY     | IDF                 | ..... |
| T.adhaerens_1        | S     | LQVYRI     | IPPVKT              | ..... |
| D.pulex_1            | S     | LETYGH     | ITGF                | ..... |
| P.humanus_corporis   | C     | LKEYRV     | IDVNF               | ..... |
| O.dioica             | T     | LQAYEF     | IPGF                | ..... |
| A.pisum              | C     | FQPF       | .....               | ..... |
| P.marinus            | G     | VALNSNLHLN | YRDASDVDRGEY        | ..... |
| A.anophagefferens_1  | I     | LASEGI     | V                   | ..... |
| E.huxleyi            | I     | AKTEGDP    | RRLARLLQLPPQARALLGA | ..... |
| consensus>50         | s     | l.e.y      | .d.i                | ..... |
